# Supplementary material for: Hypogonadism and low bone mineral density in patients on long-term intrathecal opioid delivery therapy
Source: PubMed Central journal article supplement — BMJ Open. 2013 May 31;3(6):e002856. doi: 10.1136/bmjopen-2013-002856 (PMC3669726; doi:10.1136/bmjopen-2013-002856), 2013-05-31
Supplement: bmjopen-2013-002856.draft_revisions.pdf [file bmjopen-2013-002856.draft_revisions.pdf]

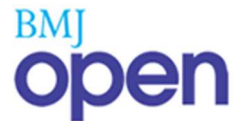

**Hypogonadism and low bone mineral density in patients on long-term intrathecal opioid delivery therapy**

|                                 |                                                                                                                                                                                                                                                                                                                                                                                                                                                                                                                                          |
|---------------------------------|------------------------------------------------------------------------------------------------------------------------------------------------------------------------------------------------------------------------------------------------------------------------------------------------------------------------------------------------------------------------------------------------------------------------------------------------------------------------------------------------------------------------------------------|
| Journal:                        | <i>BMJ Open</i>                                                                                                                                                                                                                                                                                                                                                                                                                                                                                                                          |
| Manuscript ID:                  | bmjopen-2013-002856                                                                                                                                                                                                                                                                                                                                                                                                                                                                                                                      |
| Article Type:                   | Research                                                                                                                                                                                                                                                                                                                                                                                                                                                                                                                                 |
| Date Submitted by the Author:   | 08-Mar-2013                                                                                                                                                                                                                                                                                                                                                                                                                                                                                                                              |
| Complete List of Authors:       | Duarte, Rui; Birmingham City University, Faculty of Health; Russells Hall Hospital, Department of Pain Management<br>Raphael, Jon; Birmingham City University, Faculty of Health; Russells Hall Hospital, Department of Pain Management<br>Southall, Jane; Russells Hall Hospital, Department of Pain Management<br>Labib, Mourad; Russells Hall Hospital, Department of Clinical Biochemistry<br>Whallett, Andrew; Russells Hall Hospital, Department of Rheumatology<br>Ashford, Robert; Birmingham City University, Faculty of Health |
| <b>Primary Subject Heading</b>: | Anaesthesia                                                                                                                                                                                                                                                                                                                                                                                                                                                                                                                              |
| Secondary Subject Heading:      | Neurology                                                                                                                                                                                                                                                                                                                                                                                                                                                                                                                                |
| Keywords:                       | chronic pain, hypogonadism, drug delivery systems, implantable, bone density                                                                                                                                                                                                                                                                                                                                                                                                                                                             |
|                                 |                                                                                                                                                                                                                                                                                                                                                                                                                                                                                                                                          |

SCHOLARONE™  
Manuscripts

1  
2  
3 **Hypogonadism and low bone mineral density in patients on long-term intrathecal**  
4 **opioid delivery therapy**

5  
6 Rui V. Duarte,<sup>1,2</sup> Jon H. Raphael,<sup>1,2</sup> Jane L. Southall,<sup>2</sup> Mourad H. Labib,<sup>3</sup> Andrew J.  
7 Whallett,<sup>4</sup> Robert L. Ashford<sup>1</sup>

8  
9 <sup>1</sup> Faculty of Health, Birmingham City University, Birmingham, UK

10 <sup>2</sup> Department of Pain Management, Russells Hall Hospital, Dudley, UK

11 <sup>3</sup> Department of Clinical Biochemistry, Russells Hall Hospital, Dudley, UK

12 <sup>4</sup> Department of Rheumatology, Russells Hall Hospital, Dudley, UK  
13  
14  
15  
16  
17

18 Name and address for correspondence: Rui V. Duarte, Faculty of Health, Birmingham City  
19 University, City South Campus, Room 220 Ravensbury House, B15 3TN, Birmingham,  
20 United Kingdom  
21  
22

23  
24 Tel.: +44 24768 88063; Fax: +44 0121 331 6076; Email: ruivduarte@gmail.com  
25  
26  
27

28 Keywords: bone density; chronic pain; hypogonadism; drug delivery systems, implantable  
29

30 Word count: 2,675  
31  
32  
33  
34  
35  
36  
37  
38  
39  
40  
41  
42  
43  
44  
45  
46  
47  
48  
49  
50  
51  
52  
53  
54  
55  
56  
57  
58  
59  
60

## ABSTRACT

### Objectives

This study aimed to investigate the hypothalamic-pituitary-gonadal axis in a sample of male patients undertaking intrathecal opioid delivery for the management of chronic non-malignant pain and the presence of osteopenia and/or osteoporosis in those diagnosed with hypogonadism.

### Design

Observational study using health data routinely collected for non-research purposes.

### Setting

Department of Pain Management, Russells Hall Hospital, Dudley, United Kingdom.

### Patients

Twenty consecutive male patients attending follow-up clinics for intrathecal opioid therapy had the gonadal axis evaluated by measuring their serum luteinising hormone, follicle stimulating hormone, total testosterone, sex hormone binding globulin and calculation of free testosterone. Bone mineral density was measured by DEXA scanning in those patients diagnosed with hypogonadism.

### Results

Based on calculated free testosterone concentrations, 17 (85%) patients had biochemical hypogonadism with 15 patients (75%) having free testosterone <180 pmol/L and 2 patients (10%) between 180 and 250 pmol/L. Bone mineral density was assessed in 14 of the 17 patients after the exclusion of 3 patients. Osteoporosis (defined as a T-score  $\leq$  -2.5 SD) was detected in three patients (21.4%) and osteopenia (defined as a T-score between -1.0 and -2.5 SD) was observed in seven patients (50%). Five of the 14 patients (35.7%) were at or above the intervention threshold for hip fracture.

### Conclusion

This study suggests an association between hypogonadism and low bone mass density in patients undertaking intrathecal opioid delivery for the management of chronic non-malignant pain. Surveillance of hypogonadism and bone mineral density levels followed by appropriate treatment may be paramount to reduce the risk of osteoporosis development and prevention of fractures in this group of patients.

## INTRODUCTION

Treatment strategies for the management of chronic pain start with the lowest risk and least invasive intervention and progress if a treatment is not effective. Intrathecal drug delivery

1  
2  
3 (IDD) is considered a last resort treatment for the management of severe chronic pain due to  
4 its invasive nature, concerns about long-term opioid use, and the possible complications  
5 related to this modality of treatment. Intrathecal spinal analgesia has become a recognized  
6 treatment for chronic non-malignant pain since the first reservoir was implanted in 1981.[1]  
7  
8 The use of opioids via intrathecal drug delivery allows for a selective concentration to reach  
9 an important site of pain transmission, the spinal cord dorsal horn.[2] Opioid administration  
10 into the intrathecal space achieves its effects at lower doses than using the epidural route.[3]  
11  
12 The drug is highly localized, so its analgesic efficacy is maximized at lower doses.[4]  
13  
14 Moreover, opioid dose escalation throughout the years may be modest.[5,6] These factors  
15 lead to a decrease in the possible opioid side-effects.  
16  
17  
18  
19  
20  
21  
22  
23  
24

25 The potential effect of intrathecal opioid delivery on the endocrine system is one of the least  
26 recognised and investigated.[7] Currently, opioid-induced hypogonadism is under-  
27 recognised and undertreated.[8,9] Some patients may attribute the signs and symptoms of  
28 hypogonadism; such as decreased libido, tiredness, loss of muscle mass and strength,  
29 among others, to the chronic pain and its related conditions rather than to the intrathecal  
30 medication.[7, 10] Moreover, symptoms of hypogonadism are often neither disclosed by the  
31 patient nor documented by the physician.[11] The current limited clinical awareness of the  
32 opioid effects on the endocrine system, together with the lack of information on their long-  
33 term consequences, is likely to result in a lack of information provision to the patient when  
34 long-term opioid therapy is being considered.[12]  
35  
36  
37  
38  
39  
40  
41  
42  
43  
44  
45  
46  
47

48 Animal studies suggest that opioids affect gonadotropin release via the inhibition of the  
49 gonadotropin releasing hormone (GnRH) by  $\beta$ -endorphin,[13] most likely at  $\mu$ -receptors.[14]  
50 This inhibition reduces the release of luteinizing hormone (LH) and follicle stimulating  
51 hormone (FSH) by the pituitary gland and consequently the production of testosterone by the  
52 gonads, resulting in hypogonadism and loss of libido. This is characterized by low or low-  
53  
54  
55  
56  
57  
58  
59  
60

1  
2  
3 normal LH and FSH levels, and low testosterone levels.[11] Most circulating testosterone is  
4 bound to sex hormone-binding globulin (SHBG). A lesser fraction is non-specifically bound to  
5 albumin and only a small percentage of testosterone is unbound.[15] Historically, free  
6 testosterone was thought to be the only biologically-active component. However,  
7 testosterone is weakly bound to serum albumin and dissociates freely in the capillary bed,  
8 and is readily available for tissue uptake. All non-SHBG-bound testosterone is therefore  
9 considered bioavailable.  
10

11 Hypogonadism is an important risk factor for development of osteoporosis in both sexes, but  
12 opioids have not been considered as a risk factor.[16] To our knowledge, the assessment of  
13 BMD in patients undertaking intrathecal drug delivery is limited to one study which  
14 suggested a tendency towards decreased BMD in these patients but the prevalence of  
15 osteopenia or osteoporosis in these patients was not reported in this study.[17]  
16  
17

18 The aim of this study was to investigate the hypothalamic-pituitary-gonadal axis in a sample  
19 of male patients undertaking intrathecal opioid delivery for the management of chronic non-  
20 malignant pain and to assess the prevalence of osteopenia and/or osteoporosis in those  
21 diagnosed with hypogonadism.  
22  
23

## 24 **METHODS**

### 25 **Patients**

26 Twenty consecutive male patients attending follow-up clinics for IDD therapy at Russells Hall  
27 Hospital, Dudley, UK, for the management of chronic non-cancer pain were included in this  
28 observational study using health data routinely collected for non-research purposes. Patients  
29 who had received testosterone supplementation within the previous three months were  
30 excluded. The pain syndrome experienced by the patients was classified as nociceptive  
31 (58.8%), neuropathic (5.8%) and mixed nociceptive-neuropathic (35.3%). All the patients  
32  
33  
34  
35  
36  
37  
38  
39  
40  
41  
42  
43  
44  
45  
46  
47  
48  
49  
50  
51  
52  
53  
54  
55  
56  
57  
58  
59  
60

1  
2  
3 were receiving intrathecal opioids for the management of their pain. Intrathecal morphine  
4 was the only medication administered to 50% of the sample. In individual cases, other  
5 substances were added to the intrathecal medication, with combinations of morphine with  
6 bupivacaine (12.5%), morphine with bupivacaine and clonidine (25%), and morphine with  
7 bupivacaine and baclofen (12.5%).  
8  
9  
10  
11  
12

### 13 14 15 **Laboratory Methods**

16  
17 Blood samples were collected during a seven-month period (April to October 2010), as part  
18 of routine clinical care, for the measurement of serum LH, FSH, total testosterone (TT) and  
19 SHBG. All assays were carried out by the Department of Clinical Biochemistry at Russells  
20 Hall Hospital, Dudley, UK. LH, FSH and testosterone (TT) were measured according to the  
21 manufacturer's instructions by immuno-enzymometric fluorimetric assay on the Tosoh AIA  
22 2000 LA analyser (Tosoh Bioscience N.V., Tessenderlo, Belgium). The inter-assay  
23 imprecision (%CV) quoted by the manufacturer was 2.6% for LH, 2.3% for FSH and 5.3% for  
24 testosterone. SHBG was measured according to the manufacturer's instructions by  
25 chemiluminescent immunometric assay on the Immulite 2000 XPI analyser (Siemens  
26 Healthcare Diagnostics Ltd, Camberley, Surrey, UK). The inter-assay variability (%CV) for  
27 SHBG was 5%. Calculations of free testosterone (FT) were carried out using the Vermeulen  
28 equation.[15] The quoted reference ranges were: LH (2.2-13.3 IU/L), FSH (1-7 IU/L), SHBG  
29 (13-71 nmol/L) and TT ( $\geq$  12 nmol/L). A FT < 180 picomoles per liter (pmol/L) was  
30 considered as biochemical hypogonadism and FT 180-250 pmol/L as borderline/low.[18]  
31  
32  
33  
34  
35  
36  
37  
38  
39  
40  
41  
42  
43  
44  
45  
46  
47

### 48 **Assessment of Bone Mineral Density**

49 Bone mineral density was measured by DEXA scanning of the femur (neck and hip) and  
50 lumbar spine or left forearm using the Lunar Prodigy DEXA (GE Lunar Corp., Madison, WI,  
51 USA). Bone densitometry DEXA scans were carried out by the Department of Radiology, at  
52 Corbett Hospital, Dudley, UK. Lumbar spine scan was not carried out in patients who had  
53  
54  
55  
56  
57  
58  
59  
60

1  
2  
3 previous spinal surgery. In those cases, assessment was performed at the left forearm site.  
4  
5 Results are presented as BMD ( $\text{g}/\text{cm}^2$ ), T-scores and Z-scores. Reference values for T-  
6  
7 score were based on UK (ages 20-40) femur, spine or forearm reference population (v107).  
8  
9 Osteopenia was defined as a T-score between -1.0 and -2.5 SD, and osteoporosis as a T-  
10  
11 score at or below -2.5 SD. Measurements of height, weight and body mass index (BMI) were  
12  
13 also performed. The BMI scores were categorised according to the World Health  
14  
15 Organisation key cut-off points as  $<18.5$  (underweight),  $\geq 18.5$  and  $\leq 24.9$  (normal weight),  $\geq$   
16  
17  $25$  and  $\leq 29.9$  (overweight), and  $\geq 30 \text{ kg}/\text{m}^2$  (obese). The 10-year probability of fracture was  
18  
19 calculated based on the Fracture Risk Assessment Tool (FRAX).[19] In addition to the BMD  
20  
21 value or T-score (femoral neck), this tool takes into account clinical risk factors for the  
22  
23 development of osteoporotic or hip fractures such as previous fractures, history of hip  
24  
25 fracture in the patient's parents and hypogonadism, among other factors.  
26  
27  
28

### 29 **Data analysis**

30  
31 Kolmogorov-Smirnov test was performed to test distribution of numerical data, followed by  
32  
33 the appropriate statistical tests. Comparisons between groups were carried out with the  
34  
35 Mann-Whitney test. Data is reported as median (minimum-maximum). The 95% confidence  
36  
37 intervals for the TT and FT median values were calculated for comparison with normal  
38  
39 reference values. Statistical significance was judged at 5% level. Statistical tests were  
40  
41 performed using Predictive Analytics SoftWare (PASW) (version 18.0, SPSS Inc., Chicago,  
42  
43 IL, USA).  
44  
45  
46  
47

## 48 **RESULTS**

### 49 **Assessment of Sex Hormones**

50  
51 The median age at the time of blood collection was 58 years (47-69). The median duration  
52  
53 from implantation of the IDD system to hormone assay was 100 months (15-203) with an  
54  
55 intrathecal opioid dose of 2.68 mg/day (range 1-9.7) (Table 1). The duration of pain prior to  
56  
57  
58  
59  
60

commencement of IDD was 9 years (range 3-35).

**Table 1.** Sample characteristics

|                               |                 |
|-------------------------------|-----------------|
| <b>Patients (N)</b>           | 20              |
| <b>Age (years)</b>            | 58 (47-69)      |
| <b>IDDS duration (months)</b> | 100 (15-203)    |
| <b>Opioid dose (mg/day)</b>   | 2.68 (1-9.7)    |
| <b>LH (IU/L)</b>              | 1.9 (0.2-19.9)  |
| <b>FSH (IU/L)</b>             | 5.3 (0.3-23.9)  |
| <b>SHBG (nmol/L)</b>          | 51 (17-123)     |
| <b>TT (nmol/L)</b>            | 4.95 (1.2-18.8) |
| <b>FT (pmol/L)</b>            | 69.45 (14-328)  |

**Key:** LH - luteinizing hormone; FSH - follicle stimulating hormone; SHBG - sex hormone binding globulin; TT – total testosterone; FT - free testosterone

Statistics are presented as median (minimum-maximum)

The median TT levels with 95% confidence intervals was 4.95 nmol/L (3.0-10.1), which were significantly lower than the cut-off level of 12 nmol/L for borderline/low testosterone. The median FT levels with 95% confidence intervals [69.45 (47.3-127.0)] were also significantly lower than the cut-off level of 180 pmol/L for low FT ( $t = -3.403$ ,  $p < 0.005$ ,  $r = 0.61$ ). The mean LH, FSH and SHBG concentrations were within the respective reference ranges. Based on FT calculations, 17 (85%) patients were biochemically hypogonadal with 15 (75%) at less than 180 pmol/L and two (10%) patients between 180 and 250 pmol/L.

### Assessment of Bone Mineral Density

The 17 male patients diagnosed as hypogonadal through calculated free testosterone (FT) were considered for assessment of bone mineral density. Three patients were excluded (one patient was excluded on the basis that the primary indication for IDD use was spinal osteoporosis, one patient had the intrathecal opioid therapy discontinued and one patient passed away).



The median age of the 14 patients at the time of BMD assessment was 62.5 years (48-70). The BMI score was 29.4 kg/m<sup>2</sup> (20.1-45.4). According to the BMI score, the majority of the patients (64.3%) were either overweight or obese and none of the patients were underweight.

Table 2 shows the results of the BMD assessment. Individual T-scores below -1.0 SD in at least one site were identified in 10 (71.4%) of the participants. Osteopenia defined as a T-score between -1.0 and -2.5 SD was observed in seven (50%) of the patients. Osteoporosis defined as a T-score at or below -2.5 SD was detected in three (21.4%) of the subjects. When considering the Z-scores, one (7.1%) of the participants presented a value at or below -2.5 SD indicating osteoporosis and four (28.6%) other patients Z-scores between -1.0 and -2.5 SD representative of osteopenia.

**Table 2.** Bone Mineral Density measurements

| Site of measurement   | BMD (g/cm <sup>2</sup> ) | T-score            | Z-score            |
|-----------------------|--------------------------|--------------------|--------------------|
| Femoral neck (n = 14) | 0.925 (0.734 - 1.176)    | -1.10 (-2.6 - 0.8) | -0.10 (-1.9 - 2.0) |
| Total hip (n = 14)    | 0.947 (0.686 - 1.222)    | -1.10 (-3.1 - 1.0) | -0.40 (-2.6 - 1.9) |
| Forearm (n = 10)      | 0.736 (0.665 - 0.845)    | -0.40 (-3.2 - 1.2) | 0.30 (-2.4 - 1.7)  |
| Lumbar (n = 4)        | 1.185 (0.876 - 1.487)    | -0.40 (-2.4 - 2.0) | 0.00 (-1.9 - 2.3)  |

**Key:** BMD - Bone Mineral Density

Statistics are presented as median (minimum-maximum)

Seven of the subjects had T-scores below -1.0 SD in more than one assessed site (Table 3). Three patients had either osteoporosis and/or osteopenia in two sites and four patients in three sites. Three of the participants presented Z-scores lower than -1.0 SD in three sites and one patient in two sites. No statistical differences were observed between the patients within normal reference range values and those with osteopenia or osteoporosis for age ( $p = 0.72$ ) or BMI ( $p = 0.48$ ).

**Table 3.** Bone Mineral Density outcomes

| Site of measurement   | Normal       | Osteopenia <sup>a</sup> | Osteoporosis <sup>b</sup> |
|-----------------------|--------------|-------------------------|---------------------------|
| Femoral neck (n = 14) | 7 / 14 (50%) | 5 / 14 (35.7%)          | 2 / 14 (14.3%)            |
| Total hip (n = 14)    | 7 / 14 (50%) | 4 / 14 (28.6%)          | 3 / 14 (21.4%)            |
| Forearm (n = 10)      | 7 / 10 (70%) | 2 / 10 (20%)            | 1 / 10 (10%)              |
| Lumbar (n = 4)        | 2 / 4 (50%)  | 2 / 4 (50%)             |                           |

<sup>a</sup> Osteopenia was defined as  $-2.5 \text{ SD} < \text{T-score} < -1.0 \text{ SD}$

<sup>b</sup> Osteoporosis was defined as  $\text{T-score} \leq -2.5 \text{ SD}$

Values represent the number of patients/total patients (%)

Several known clinical risk factors for low bone mineral density were present in this sample including hypogonadism in all of the patients. Although no incident fractures occurred in the studied group, assessment of the ten year probability of major osteoporotic or hip fracture based on the FRAX tool indicated a median probability of 5.7% (2.3-17) for major osteoporotic fracture and 1.1% (0.1-11) for hip fracture. Five (35.7%) of the participants were at or above the intervention threshold for hip fracture.

## DISCUSSION

Our study showed that 85% of male patients on intrathecal opioid therapy were biochemically hypogonadal. The serum gonadotropin (LH and FSH) levels in these patients were inappropriately low or low-normal despite low serum testosterone concentrations, suggesting that testosterone suppression was caused through an inhibition of pituitary FSH and LH secretion (secondary hypogonadism). In a group of cancer survivors on opioids, 90% exhibited hypogonadism and low testosterone levels; LH levels but not FSH levels were found to be significantly lower when compared with cancer survivors not on opioid therapy.[20] The important role of endogenous opioids in the control of LH secretion has been demonstrated [21] and suppression of the hypothalamic-pituitary-gonadal axis by intrathecal opioids may be caused by a similar mechanism to that of endogenous opioids.[22] Nevertheless, the suppression of LH levels may be less accentuated when the opioids are administered orally or transdermally rather than intrathecally.[12]

1  
2  
3  
4  
5 Several possible factors may affect the sexual function in this group of patients.  
6

7 Psychological aspects such as depression, passive coping strategies and catastrophising  
8 are some of the factors hypothesized to influence the sexual function in chronic pain  
9 patients.[23] However, chronic pain did not seem to be the cause of gonadal function  
10 reduction in patients undertaking intrathecal morphine therapy when compared with a control  
11 group of chronic pain patients who were not taking any form of opioid drugs.[22] Of the  
12 possible chronic illnesses identified in a longitudinal study with 890 male participants, only  
13 cancer (9%) was associated with a greater decrease in testosterone levels than the  
14 decrease that occurred with ageing alone.[24]  
15  
16  
17  
18  
19  
20  
21  
22  
23  
24

25 Hypogonadism is an important risk factor for the development of osteoporosis in both  
26 sexes.[16] To our knowledge, the incidence of osteopaenia or osteoporosis in patients  
27 undertaking intrathecal opioid therapy has not been previously reported. In our study, 50% of  
28 patients had osteopenia and 21.4% had osteoporosis. Interestingly, an association between  
29 oral opioid administration and reduced BMD was demonstrated in one study but the  
30 presence or absence of hypogonadism was not assessed.[25] In a cross-sectional study,  
31 osteopenia was present in 50% of the male patients undertaking oral opioids [26] but again it  
32 was not clear if those patients were hypogonadal.  
33  
34  
35  
36  
37  
38  
39  
40  
41  
42

43 An association between oral opioid medication and an increase in fracture risk has also been  
44 reported [27] but assessment of bone mineral density was not performed. The authors  
45 suggested that this increase in fracture risk was possibly related to the risk of falls due to the  
46 central nervous system side effect of dizziness caused by oral opioids. Opioid-induced  
47 dizziness is less likely to occur in IDD patients since only a fraction of the opioid delivered  
48 via intrathecal route reaches the brain. Low bone mass is an important component of the risk  
49 of fracture as well as non-skeletal factors such as propensity to fall.[16,28] Many fragility  
50  
51  
52  
53  
54  
55  
56  
57  
58  
59  
60

1  
2  
3 fractures occur in the absence of osteoporosis, although in the presence of this disease, the  
4 risk of fracture is higher.[29] Osteoporotic fractures are a significant cause of morbidity and  
5 mortality especially in the developed countries,[30] and are associated with increased  
6 mortality, particularly in men.[31]  
7  
8  
9

10  
11  
12 The assumption that hypogonadism is a risk factor for decreased BMD has not always been  
13 confirmed in the literature. No association between age-related hypogonadism (based on  
14 total testosterone) and decreased BMD was found in elderly men.[32] In contrast, free  
15 testosterone (calculated according to the Vermeulen equation) was demonstrated to be an  
16 independent predictor of BMD and fractures in elderly men [33] and a positive predictor of  
17 cortical bone size in young men at the age of peak bone mass.[34] These contradictory  
18 findings may have occurred because free testosterone is more important physiologically than  
19 total testosterone. SHBG levels, which generally are genetically determined, seem to play an  
20 important role in bone mass, hence the reason for free testosterone to be a stronger  
21 predictor than total testosterone alone. Recently it has been suggested that SHBG levels in  
22 healthy adult men at the age of peak bone mass were positively associated with cortical  
23 bone size independently of sex-steroid levels.[35] However, in middle aged and elderly men,  
24 SHBG elevation was significantly associated with the occurrence of osteoporotic  
25 fractures.[36] Although not yet confirmed, it has been suggested that the effect of SHBG on  
26 BMD may change with age and/or testosterone sufficiency or deficiency.[37]  
27  
28  
29  
30  
31  
32  
33  
34  
35  
36  
37  
38  
39  
40  
41  
42  
43  
44  
45

46 It is important to note the limitations of this study. A small number of patients were included  
47 without a control group. The gonadal status and bone mineral density were not evaluated  
48 prior to commencement of IDD therapy. Women were not included in this study. Low libido  
49 and amenorrhea have been reported in female IDDS patients,[17,22] although the  
50 prevalence has been reported to be lower in women.[26] A large meta-analysis, which  
51 included approximately 39,000 men and women has concluded that the age-specific risk of  
52  
53  
54  
55  
56  
57  
58  
59  
60

1  
2  
3 hip fracture is similar in both men and women with the same BMD and age.[38] Despite  
4 these limitations, the results of BMD assessment suggest that the IDD population may have  
5 an increased risk for osteoporotic fractures.  
6  
7  
8  
9

10  
11 It is important to provide appropriate treatment to patients with low BMD. FRAX analysis is a  
12 simple tool that can be used to identify of patients in whom osteoporosis prophylaxis is  
13 appropriate by taking into account multiple risk factors including BMD levels and  
14 hypogonadism. BMD can be normalized and maintained within the normal range in men with  
15 either primary or secondary hypogonadism by continuous, long-term hormonal replacement  
16 therapy [39] though the full effect on BMD may take up to 24 months.[40]  
17  
18  
19  
20  
21  
22  
23  
24

25 This study suggests an important association between hypogonadism and low bone mass  
26 density in patients undertaking intrathecal opioid delivery for the management of chronic  
27 non-malignant pain. Early detection of hypogonadism followed by appropriate treatment may  
28 be paramount to reduce the risk of osteoporosis development and prevention of fractures in  
29 this population. Furthermore, surveillance of BMD levels in hypogonadal intrathecal opioid  
30 delivery patients should be considered.  
31  
32  
33  
34  
35  
36  
37  
38  
39  
40  
41  
42  
43  
44  
45  
46  
47  
48  
49  
50  
51  
52  
53  
54  
55  
56  
57  
58  
59  
60

## ARTICLE SUMMARY

### Article focus

- Hypogonadism is common in intrathecal opioid therapy patients but there is limited literature investigating bone mineral density in this population.
- We aimed to prospectively investigate if undiagnosed hypogonadism in intrathecal opioid therapy patients may result in low bone mineral density levels.

### Key messages

- Undiagnosed hypogonadism in intrathecal opioid therapy patients may lead to low bone mineral density levels.
- Hypogonadism and bone mineral density levels surveillance may be paramount to reduce the risk of osteoporosis and fractures in patients undertaking intrathecal opioid therapy.

### Strengths and limitations of this study

- To our knowledge, this is the first study to specifically address the potential decrease in bone mineral density as a consequence of long-term intrathecal opioid therapy.
- Further studies are warranted to assess the effectiveness of early detection and adequate treatment to prevent bone mineral density decrease and to investigate the value of hormonal replacement therapy to normalise bone mineral density levels.

### Acknowledgments

The authors are grateful to Dr Jane Dale from the Department of Endocrinology and Diabetes at Russells Hall Hospital for her comments on the final version of this manuscript.

### Funding statement

This research received no specific grant from any funding agency in the public, commercial or not-for-profit sectors.

### Competing interests statement

The authors report no conflicts of interest.

### Contributorship statement

RVD, JHR, JLS, MHL, AJW and RLA have made substantial contributions to (1) the conception and design of the study, or acquisition of data, or analysis and interpretation of data; (2) drafting the article or revising it critically for important intellectual content; and (3) final approval of the version to be submitted.

### Ethics approval

All assessments were performed as part of routine clinical care. No additional procedures were carried out for research purposes.

### REFERENCES

- 1 Onofrio BM, Yaksh TL, Arnold PG. Continuous low-dose intrathecal morphine administration in the treatment of chronic pain of malignant origin. *Mayo Clin Proc* 1981;56:516-20.
- 2 Grady K, Raphael J. Spinal administration. In: Rice A. ed. *Textbook of Clinical Pain Management: Chronic Volume*. London: Hodder Arnold 2008:284-91.
- 3 Nordberg G, Hedner T, Mellstrand T, et al. Pharmacokinetic aspects of intrathecal morphine analgesia. *Anesthesiology* 1984;60:448-54.
- 4 Bernards C. Cerebrospinal fluid and spinal cord distribution of baclofen and bupivacaine during slow intrathecal infusion in pigs. *Anesthesiology* 2006;105:169-178.
- 5 Duarte RV, Raphael JH, Sparkes E, et al. Long-term intrathecal drug administration for chronic nonmalignant pain. *J Neurosurg Anesthesiol* 2012;24:63-70.
- 6 Duarte RV, Raphael JH, Haque MS, et al. A predictive model for intrathecal opioid dose escalation for chronic non-cancer pain. *Pain Physician* 2012;15:363-69.

- 1  
2  
3 7 Doleys D, Dinoff B, Page L, et al. Sexual dysfunction and other side effects of intraspinal  
4 opiate use in the management of chronic non-cancer pain. *American Journal of Pain*  
5 *Management* 1998;8:5-11.  
6  
7  
8  
9 8 Reddy RG, Aung T, Karavitaki N, et al. Opioid induced hypogonadism. *BMJ*  
10 2010;341:c4462.  
11  
12  
13 9 Duarte RV, Raphael JH, Mourad Labib, et al. Prevalence and influence of diagnostic  
14 criteria in the assessment of hypogonadism in intrathecal opioid therapy patients. *Pain*  
15 *Physician* 2013;16:9-14.  
16  
17  
18  
19 10 Katz N, Mazer NA. The impact of opioids on the endocrine system. *Clin J Pain*  
20 2009;25:170-5.  
21  
22  
23 11 Petak SM, Nankin HR, Spark RF, et al. American Association of Clinical Endocrinologists  
24 Medical Guidelines for clinical practice for the evaluation and treatment of hypogonadism  
25 in adult male patients - 2002 update. *Endocr Pract* 2002;8:440-56.  
26  
27  
28  
29 12 Vuong C, Van Uum SHM, O'Dell LE, et al. The effects of opioids and opioid analogs on  
30 animal and human endocrine systems. *Endocr Rev* 2010;31:98-132.  
31  
32  
33 13 Schulz R, Wilhelm A, Pirke KM, et al. Beta-endorphin and dynorphin control serum  
34 luteinizing hormone level in immature female rats. *Nature* 1981;294:757-9.  
35  
36  
37 14 Pfeiffer DG, Pfeiffer A, Shimohigashi Y, et al. Predominant involvement of mu-rather than  
38 delta- or kappa-opiate receptors in LH secretion. *Peptides* 1983;4:647-9.  
39  
40  
41 15 Vermeulen A, Verdonck L, Kaufman JM. A critical evaluation of simple methods for the  
42 estimation of free testosterone in serum. *J Clin Endocrinol Metab* 1999;84:3666-72.  
43  
44  
45 16 Kanis JA. Diagnosis of osteoporosis and assessment of fracture risk. *Lancet*  
46 2002;359:1929-36.  
47  
48  
49 17 Abs R, Verhelst J, Maeyaert J, et al. Endocrine consequences of long-term intrathecal  
50 administration of opioids. *J Clin Endocrinol Metab* 2000;85:2215-22.  
51  
52  
53 18 Hackett G, Cole NS, Deshpande AA, et al. Biochemical hypogonadism in men with type 2  
54 diabetes in primary care practice. *Br J Diabetes Vasc Dis* 2009;9:226-31.  
55  
56  
57  
58  
59  
60



- 1  
2  
3 19 Kanis JA, Johnell O, Oden A, et al. FRAX and the assessment of fracture probability in  
4 men and women from the UK. *Osteoporos Int* 2008;19:385-97.  
5  
6  
7 20 Rajagopal A, Vassilopoulou-Sellin R, Palmer JL, et al. Symptomatic hypogonadism in  
8 male survivors of cancer with chronic exposure to opioids. *Cancer* 2004;100:851-8.  
9  
10  
11 21 Genazzani AR, Genazzani AD, Volpogni C, et al. Opioid control of gonadotrophin  
12 secretion in humans. *Hum Reprod* 1993;8(Suppl 2):151-3.  
13  
14  
15 22 Finch P, Roberts L, Price L, et al. Hypogonadism in patients treated with intrathecal  
16 morphine. *Clin J Pain* 2000;16:251-4.  
17  
18  
19 23 Monga TN, Tan G, Ostermann HJ, et al. Sexuality and sexual adjustment of patients with  
20 chronic pain. *Disabil Rehabil* 1998;20:317-29.  
21  
22  
23 24 Harman S, Metter E, Tobin J, et al. Longitudinal effects of aging on serum total and free  
24 testosterone levels in healthy men. *J Clin Endocrinol Metab* 2001;86:724-31.  
25  
26  
27 25 Kinjo M, Setoguchi S, Schneeweiss S, et al. Bone mineral density in subjects using  
28 central nervous system-active medications. *Am J Med* 2005;118:1414.  
29  
30  
31 26 Fraser LA, Morrison D, Morley-Forster P, et al. Oral opioids for chronic non-cancer pain:  
32 higher prevalence of hypogonadism in men than in women. *Exp Clin Endocrinol Diabetes*  
33 2009;117:38-43.  
34  
35  
36  
37 27 Vestergaard P, Rejnmark L, Mosekilde L. Fracture risk associated with the use of  
38 morphine and opiates. *J Inter Med* 2006;260:76-87.  
39  
40  
41 28 Center JR, Nguyen TV, Sambrook PN, et al. Hormonal and biochemical parameters and  
42 osteoporotic fractures in elderly men. *J Bone Miner Res* 2000;15:05-1411.  
43  
44  
45 29 Kanis JA, Melton LJ, Christiansen C, et al. The diagnosis of osteoporosis. *J Bone Miner*  
46 *Res* 1994;9:1137-41.  
47  
48  
49 30 Johnell O, Kanis JA. An estimate of the worldwide prevalence and disability associated  
50 with osteoporotic fractures. *Osteoporos Int* 2006;17:1726-33.  
51  
52  
53 31 Center JR, Nguyen TV, Schneider D, et al. Mortality after all major types of osteoporotic  
54 fracture in men and women: an observational study. *Lancet* 1999;353:878-82.  
55  
56  
57  
58  
59  
60

- 1  
2  
3 32 Amin S, Zhang Y, Sawin CT, et al. Association of hypogonadism and estradiol levels with  
4 bone mineral density in elderly men from the Framingham study. *Ann Intern Med*  
5 2000;133:951-63.  
6  
7  
8  
9 33 Mellström D, Johnell O, Ljunggren O, et al. Free testosterone is an independent predictor  
10 of BMD and prevalent fractures in elderly men: MrOS Sweden. *J Bone Miner Res*  
11 2006;21:529-35.  
12  
13  
14 34 Lorentzon M, Swanson C, Andersson N, et al. Free testosterone is a positive, whereas  
15 free estradiol is a negative, predictor of cortical bone size in young Swedish men: the  
16 GOOD study. *J Bone Miner Res* 2005;20:1334-41.  
17  
18  
19  
20  
21 35 Vanbillemont G, Lapauw B, Bogaert V, et al. Sex hormone-binding globulin as an  
22 independent determinant of cortical bone status in men at the age of peak bone mass. *J*  
23 *Clin Endocrinol Metab* 2010;95:1579-86.  
24  
25  
26  
27 36 Hoppé E, Bouvard B, Royer M, et al. Sex hormone-binding globulin in osteoporosis. *Joint*  
28 *Bone Spine* 2010;77:306-312.  
29  
30  
31 37 Khosla S. Sex hormone binding globulin: inhibitor or facilitator (or both) of sex steroid  
32 action? *J Clin Endocrinol Metab* 2006;91:4764-6.  
33  
34  
35  
36 38 Johnell O, Kanis JA, Oden A, et al. Predictive value of BMD for hip and other fractures. *J*  
37 *Bone Miner Res* 2005;20:1185-94.  
38  
39  
40 39 Katznelson L, Finkelstein JS, Schoenfeld DA, et al. Increase in bone density and lean  
41 body mass during testosterone administration in men with acquired hypogonadism. *J Clin*  
42 *Endocrinol Metab* 1996;81:4358-65.  
43  
44  
45  
46 40 Snyder PJ, Peachey H, Berlin JA, et al. Effects of testosterone replacement in  
47 hypogonadal men. *J Clin Endocrinol Metab* 2000;85:2670-77.  
48  
49  
50  
51  
52  
53  
54  
55  
56  
57  
58  
59  
60

## STROBE Statement—checklist of items that should be included in reports of observational studies

|                              | Item No | Recommendation                                                                                                                                                                                                                                                                                                                                                                                                                                                                                                                                                                                                                                                                                                   |
|------------------------------|---------|------------------------------------------------------------------------------------------------------------------------------------------------------------------------------------------------------------------------------------------------------------------------------------------------------------------------------------------------------------------------------------------------------------------------------------------------------------------------------------------------------------------------------------------------------------------------------------------------------------------------------------------------------------------------------------------------------------------|
| <b>Title and abstract</b>    | 1       | (a) Indicate the study's design with a commonly used term in the title or the abstract <b>Page 2</b><br>(b) Provide in the abstract an informative and balanced summary of what was done and what was found <b>Page 2</b>                                                                                                                                                                                                                                                                                                                                                                                                                                                                                        |
| <b>Introduction</b>          |         |                                                                                                                                                                                                                                                                                                                                                                                                                                                                                                                                                                                                                                                                                                                  |
| Background/rationale         | 2       | Explain the scientific background and rationale for the investigation being reported <b>Page 2-4</b>                                                                                                                                                                                                                                                                                                                                                                                                                                                                                                                                                                                                             |
| Objectives                   | 3       | State specific objectives, including any prespecified hypotheses <b>Page 4</b>                                                                                                                                                                                                                                                                                                                                                                                                                                                                                                                                                                                                                                   |
| <b>Methods</b>               |         |                                                                                                                                                                                                                                                                                                                                                                                                                                                                                                                                                                                                                                                                                                                  |
| Study design                 | 4       | Present key elements of study design early in the paper <b>Page 4</b>                                                                                                                                                                                                                                                                                                                                                                                                                                                                                                                                                                                                                                            |
| Setting                      | 5       | Describe the setting, locations, and relevant dates, including periods of recruitment, exposure, follow-up, and data collection <b>Page 4,5</b>                                                                                                                                                                                                                                                                                                                                                                                                                                                                                                                                                                  |
| Participants                 | 6       | (a) <i>Cohort study</i> —Give the eligibility criteria, and the sources and methods of selection of participants. Describe methods of follow-up <b>Page 4-6</b><br><i>Case-control study</i> —Give the eligibility criteria, and the sources and methods of case ascertainment and control selection. Give the rationale for the choice of cases and controls<br><i>Cross-sectional study</i> —Give the eligibility criteria, and the sources and methods of selection of participants<br>(b) <i>Cohort study</i> —For matched studies, give matching criteria and number of exposed and unexposed<br><i>Case-control study</i> —For matched studies, give matching criteria and the number of controls per case |
| Variables                    | 7       | Clearly define all outcomes, exposures, predictors, potential confounders, and effect modifiers. Give diagnostic criteria, if applicable <b>Page 4,5</b>                                                                                                                                                                                                                                                                                                                                                                                                                                                                                                                                                         |
| Data sources/<br>measurement | 8*      | For each variable of interest, give sources of data and details of methods of assessment (measurement). Describe comparability of assessment methods if there is more than one group <b>Page 4,5</b>                                                                                                                                                                                                                                                                                                                                                                                                                                                                                                             |
| Bias                         | 9       | Describe any efforts to address potential sources of bias <b>Page 4</b>                                                                                                                                                                                                                                                                                                                                                                                                                                                                                                                                                                                                                                          |
| Study size                   | 10      | Explain how the study size was arrived at                                                                                                                                                                                                                                                                                                                                                                                                                                                                                                                                                                                                                                                                        |
| Quantitative variables       | 11      | Explain how quantitative variables were handled in the analyses. If applicable, describe which groupings were chosen and why <b>Page 6</b>                                                                                                                                                                                                                                                                                                                                                                                                                                                                                                                                                                       |
| Statistical methods          | 12      | (a) Describe all statistical methods, including those used to control for confounding <b>Page 6</b><br>(b) Describe any methods used to examine subgroups and interactions <b>Page 6</b><br>(c) Explain how missing data were addressed<br>(d) <i>Cohort study</i> —If applicable, explain how loss to follow-up was addressed<br><i>Case-control study</i> —If applicable, explain how matching of cases and controls was addressed<br><i>Cross-sectional study</i> —If applicable, describe analytical methods taking account of sampling strategy<br>(e) Describe any sensitivity analyses                                                                                                                    |

Continued on next page

**Results**

|                  |     |                                                                                                                                                                                                                                                                                                                                                                                                                                             |
|------------------|-----|---------------------------------------------------------------------------------------------------------------------------------------------------------------------------------------------------------------------------------------------------------------------------------------------------------------------------------------------------------------------------------------------------------------------------------------------|
| Participants     | 13* | (a) Report numbers of individuals at each stage of study—eg numbers potentially eligible, examined for eligibility, confirmed eligible, included in the study, completing follow-up, and analysed <b>Page 6,7</b><br>(b) Give reasons for non-participation at each stage <b>Page 7</b><br>(c) Consider use of a flow diagram                                                                                                               |
| Descriptive data | 14* | (a) Give characteristics of study participants (eg demographic, clinical, social) and information on exposures and potential confounders <b>Page 6-8</b><br>(b) Indicate number of participants with missing data for each variable of interest<br>(c) <i>Cohort study</i> —Summarise follow-up time (eg, average and total amount)                                                                                                         |
| Outcome data     | 15* | <i>Cohort study</i> —Report numbers of outcome events or summary measures over time <b>Page 7-9</b><br><i>Case-control study</i> —Report numbers in each exposure category, or summary measures of exposure<br><i>Cross-sectional study</i> —Report numbers of outcome events or summary measures                                                                                                                                           |
| Main results     | 16  | (a) Give unadjusted estimates and, if applicable, confounder-adjusted estimates and their precision (eg, 95% confidence interval). Make clear which confounders were adjusted for and why they were included <b>Page 7</b><br>(b) Report category boundaries when continuous variables were categorized <b>Page 5-6</b><br>(c) If relevant, consider translating estimates of relative risk into absolute risk for a meaningful time period |
| Other analyses   | 17  | Report other analyses done—eg analyses of subgroups and interactions, and sensitivity analyses                                                                                                                                                                                                                                                                                                                                              |

**Discussion**

|                  |    |                                                                                                                                                                                             |
|------------------|----|---------------------------------------------------------------------------------------------------------------------------------------------------------------------------------------------|
| Key results      | 18 | Summarise key results with reference to study objectives <b>Page 9</b>                                                                                                                      |
| Limitations      | 19 | Discuss limitations of the study, taking into account sources of potential bias or imprecision. Discuss both direction and magnitude of any potential bias <b>Page 11,12</b>                |
| Interpretation   | 20 | Give a cautious overall interpretation of results considering objectives, limitations, multiplicity of analyses, results from similar studies, and other relevant evidence <b>Page 9-12</b> |
| Generalisability | 21 | Discuss the generalisability (external validity) of the study results <b>Page 12</b>                                                                                                        |

**Other information**

|         |    |                                                                                                                                                                              |
|---------|----|------------------------------------------------------------------------------------------------------------------------------------------------------------------------------|
| Funding | 22 | Give the source of funding and the role of the funders for the present study and, if applicable, for the original study on which the present article is based <b>Page 13</b> |
|---------|----|------------------------------------------------------------------------------------------------------------------------------------------------------------------------------|

\*Give information separately for cases and controls in case-control studies and, if applicable, for exposed and unexposed groups in cohort and cross-sectional studies.

**Note:** An Explanation and Elaboration article discusses each checklist item and gives methodological background and published examples of transparent reporting. The STROBE checklist is best used in conjunction with this article (freely available on the Web sites of PLoS Medicine at <http://www.plosmedicine.org/>, Annals of Internal Medicine at <http://www.annals.org/>, and Epidemiology at <http://www.epidem.com/>). Information on the STROBE Initiative is available at [www.strobe-statement.org](http://www.strobe-statement.org).



**Hypogonadism and low bone mineral density in patients on long-term intrathecal opioid delivery therapy**

|                                 |                                                                                                                                                                                                                                                                                                                                                                                                                                                                                                                                          |
|---------------------------------|------------------------------------------------------------------------------------------------------------------------------------------------------------------------------------------------------------------------------------------------------------------------------------------------------------------------------------------------------------------------------------------------------------------------------------------------------------------------------------------------------------------------------------------|
| Journal:                        | <i>BMJ Open</i>                                                                                                                                                                                                                                                                                                                                                                                                                                                                                                                          |
| Manuscript ID:                  | bmjopen-2013-002856.R1                                                                                                                                                                                                                                                                                                                                                                                                                                                                                                                   |
| Article Type:                   | Research                                                                                                                                                                                                                                                                                                                                                                                                                                                                                                                                 |
| Date Submitted by the Author:   | 13-Apr-2013                                                                                                                                                                                                                                                                                                                                                                                                                                                                                                                              |
| Complete List of Authors:       | Duarte, Rui; Birmingham City University, Faculty of Health; Russells Hall Hospital, Department of Pain Management<br>Raphael, Jon; Birmingham City University, Faculty of Health; Russells Hall Hospital, Department of Pain Management<br>Southall, Jane; Russells Hall Hospital, Department of Pain Management<br>Labib, Mourad; Russells Hall Hospital, Department of Clinical Biochemistry<br>Whallett, Andrew; Russells Hall Hospital, Department of Rheumatology<br>Ashford, Robert; Birmingham City University, Faculty of Health |
| <b>Primary Subject Heading</b>: | Anaesthesia                                                                                                                                                                                                                                                                                                                                                                                                                                                                                                                              |
| Secondary Subject Heading:      | Neurology                                                                                                                                                                                                                                                                                                                                                                                                                                                                                                                                |
| Keywords:                       | chronic pain, hypogonadism, drug delivery systems, implantable, bone density                                                                                                                                                                                                                                                                                                                                                                                                                                                             |
|                                 |                                                                                                                                                                                                                                                                                                                                                                                                                                                                                                                                          |

SCHOLARONE™  
Manuscripts

1  
2  
3 **Hypogonadism and low bone mineral density in patients on long-term intrathecal**  
4 **opioid delivery therapy**

5  
6 Rui V. Duarte,<sup>1,2</sup> Jon H. Raphael,<sup>1,2</sup> Jane L. Southall,<sup>2</sup> Mourad H. Labib,<sup>3</sup> Andrew J.  
7 Whallett,<sup>4</sup> Robert L. Ashford<sup>1</sup>

8  
9 <sup>1</sup> Faculty of Health, Birmingham City University, Birmingham, UK

10 <sup>2</sup> Department of Pain Management, Russells Hall Hospital, Dudley, UK

11 <sup>3</sup> Department of Clinical Biochemistry, Russells Hall Hospital, Dudley, UK

12 <sup>4</sup> Department of Rheumatology, Russells Hall Hospital, Dudley, UK  
13  
14  
15  
16  
17

18 Name and address for correspondence: Rui V. Duarte, Faculty of Health, Birmingham City  
19 University, City South Campus, Room 220 Ravensbury House, B15 3TN, Birmingham,  
20 United Kingdom  
21  
22

23  
24 Tel.: +44 24768 88063; Fax: +44 0121 331 6076; Email: ruivduarte@gmail.com  
25  
26  
27

28 Keywords: bone density; chronic pain; hypogonadism; drug delivery systems, implantable  
29

30 Word count: 2,675  
31  
32  
33  
34  
35  
36  
37  
38  
39  
40  
41  
42  
43  
44  
45  
46  
47  
48  
49  
50  
51  
52  
53  
54  
55  
56  
57  
58  
59  
60

## ABSTRACT

### Objectives

This study aimed to investigate the hypothalamic-pituitary-gonadal axis in a sample of male patients undertaking intrathecal opioid delivery for the management of chronic non-malignant pain and the presence of osteopenia and/or osteoporosis in those diagnosed with hypogonadism.

### Design

Observational study using health data routinely collected for non-research purposes.

### Setting

Department of Pain Management, Russells Hall Hospital, Dudley, United Kingdom.

### Patients

Twenty consecutive male patients attending follow-up clinics for intrathecal opioid therapy had the gonadal axis evaluated by measuring their serum luteinising hormone, follicle stimulating hormone, total testosterone, sex hormone binding globulin and calculation of free testosterone. Bone mineral density was measured by DEXA scanning in those patients diagnosed with hypogonadism.

### Results

Based on calculated free testosterone concentrations, 17 (85%) patients had biochemical hypogonadism with 15 patients (75%) having free testosterone <180 pmol/L and 2 patients (10%) between 180 and 250 pmol/L. Bone mineral density was assessed in 14 of the 17 patients after the exclusion of 3 patients. Osteoporosis (defined as a T-score  $\leq$  -2.5 SD) was detected in three patients (21.4%) and osteopenia (defined as a T-score between -1.0 and -2.5 SD) was observed in seven patients (50%). Five of the 14 patients (35.7%) were at or above the intervention threshold for hip fracture.

### Conclusion

This study suggests an association between hypogonadism and low bone mass density in patients undertaking intrathecal opioid delivery for the management of chronic non-malignant pain. Surveillance of hypogonadism and bone mineral density levels followed by appropriate treatment may be paramount to reduce the risk of osteoporosis development and prevention of fractures in this group of patients.

## INTRODUCTION

Treatment strategies for the management of chronic pain start with the lowest risk and least invasive intervention and progress if a treatment is not effective. Intrathecal drug delivery

1  
2  
3 (IDD) is considered a last resort treatment for the management of severe chronic pain due to  
4 its invasive nature, concerns about long-term opioid use, and the possible complications  
5 related to this modality of treatment. Intrathecal spinal analgesia has become a recognized  
6 treatment for chronic non-malignant pain since the first reservoir was implanted in 1981.[1]  
7  
8 The use of opioids via intrathecal drug delivery allows for a selective concentration to reach  
9 an important site of pain transmission, the spinal cord dorsal horn.[2] Opioid administration  
10 into the intrathecal space achieves its effects at lower doses than using the epidural route.[3]  
11  
12 The drug is highly localized, so its analgesic efficacy is maximized at lower doses.[4]  
13  
14 Moreover, opioid dose escalation throughout the years may be modest.[5,6] These factors  
15 lead to a decrease in the possible opioid side-effects.  
16  
17  
18  
19  
20  
21  
22  
23  
24

25 The potential effect of intrathecal opioid delivery on the endocrine system is one of the least  
26 recognised and investigated.[7] Currently, opioid-induced hypogonadism is under-  
27 recognised and undertreated.[8,9] Some patients may attribute the signs and symptoms of  
28 hypogonadism; such as decreased libido, tiredness, loss of muscle mass and strength,  
29 among others, to the chronic pain and its related conditions rather than to the intrathecal  
30 medication.[7, 10] Moreover, symptoms of hypogonadism are often neither disclosed by the  
31 patient nor documented by the physician.[11] The current limited clinical awareness of the  
32 opioid effects on the endocrine system, together with the lack of information on their long-  
33 term consequences, is likely to result in a lack of information provision to the patient when  
34 long-term opioid therapy is being considered.[12]  
35  
36  
37  
38  
39  
40  
41  
42  
43  
44  
45  
46  
47

48 Animal studies suggest that opioids affect gonadotropin release via the inhibition of the  
49 gonadotropin releasing hormone (GnRH) by  $\beta$ -endorphin,[13] most likely at  $\mu$ -receptors.[14]  
50 This inhibition reduces the release of luteinizing hormone (LH) and follicle stimulating  
51 hormone (FSH) by the pituitary gland and consequently the production of testosterone by the  
52 gonads, resulting in hypogonadism and loss of libido. This is characterized by low or low-  
53  
54  
55  
56  
57  
58  
59  
60



1  
2  
3 normal LH and FSH levels, and low testosterone levels.[11] Most circulating testosterone is  
4 bound to sex hormone-binding globulin (SHBG). A lesser fraction is non-specifically bound to  
5 albumin and only a small percentage of testosterone is unbound.[15] Historically, free  
6 testosterone was thought to be the only biologically-active component. However,  
7 testosterone is weakly bound to serum albumin and dissociates freely in the capillary bed,  
8 and is readily available for tissue uptake. All non-SHBG-bound testosterone is therefore  
9 considered bioavailable.  
10

11 Hypogonadism is an important risk factor for development of osteoporosis in both sexes, but  
12 opioids have not been considered as a risk factor.[16] To our knowledge, the assessment of  
13 BMD in patients undertaking intrathecal drug delivery is limited to one study which  
14 suggested a tendency towards decreased BMD in these patients but the prevalence of  
15 osteopenia or osteoporosis in these patients was not reported in this study.[17]  
16  
17

18 The aim of this study was to investigate the hypothalamic-pituitary-gonadal axis in a sample  
19 of male patients undertaking intrathecal opioid delivery for the management of chronic non-  
20 malignant pain and to assess the prevalence of osteopenia and/or osteoporosis in those  
21 diagnosed with hypogonadism.  
22  
23

## 24 **METHODS**

### 25 **Patients**

26 Twenty consecutive male patients attending follow-up clinics for IDD therapy at Russells Hall  
27 Hospital, Dudley, UK, for the management of chronic non-cancer pain were included in this  
28 observational study using health data routinely collected for non-research purposes. All  
29 assessments were performed as part of routine clinical care. No additional procedures were  
30 carried out for research purposes. None of these patients received testosterone  
31 supplementation within the previous three months. The pain syndrome experienced by the  
32  
33  
34  
35  
36  
37  
38  
39  
40  
41  
42  
43  
44  
45  
46  
47  
48  
49  
50  
51  
52  
53  
54  
55  
56  
57  
58  
59  
60

1  
2  
3 patients was classified as nociceptive (58.8%), neuropathic (5.8%) and mixed nociceptive-  
4 neuropathic (35.3%). All the patients were receiving intrathecal opioids for the management  
5 of their pain. Intrathecal morphine was the only medication administered to 50% of the  
6 sample. In individual cases, other substances were added to the intrathecal medication, with  
7 combinations of morphine with bupivacaine (12.5%), morphine with bupivacaine and  
8 clonidine (25%), and morphine with bupivacaine and baclofen (12.5%).  
9  
10  
11  
12  
13  
14  
15  
16

### 17 **Laboratory Methods**

18  
19 Blood samples were collected between 8am and 11am during a seven-month period (April to  
20 October 2010), as part of routine clinical care, for the measurement of serum LH, FSH,  
21 prolactin (PRL), total testosterone (TT) and SHBG. All assays were carried out by the  
22 Department of Clinical Biochemistry at Russells Hall Hospital, Dudley, UK. LH, FSH, PRL  
23 and TT were measured according to the manufacturer's instructions by immuno-  
24 enzymometric fluorimetric assay on the Tosoh AIA 2000 LA analyser (Tosoh Bioscience  
25 N.V., Tessenderlo, Belgium). The inter-assay imprecision (%CV) quoted by the manufacturer  
26 was 2.6% for LH, 2.3% for FSH and 5.3% for testosterone. SHBG was measured according  
27 to the manufacturer's instructions by chemiluminescent immunometric assay on the Immulite  
28 2000 XPi analyser (Siemens Healthcare Diagnostics Ltd, Camberley, Surrey, UK). The inter-  
29 assay variability (%CV) for SHBG was 5%. Calculations of free testosterone (FT) were  
30 carried out using the Vermeulen equation.[15] The quoted reference ranges were: LH (2.2-  
31 13.3 IU/L), FSH (1-7 IU/L), SHBG (13-71 nmol/L) and PRL (0-445 mU/L). Serum TT < 8  
32 nmol/L and/or FT < 180 pmol/L was considered as biochemical hypogonadism. Serum TT 8  
33 – 12 nmol/L and/or FT 180-250 pmol/L was considered as borderline/low.[18]  
34  
35  
36  
37  
38  
39  
40  
41  
42  
43  
44  
45  
46  
47  
48  
49  
50

### 51 **Assessment of Bone Mineral Density**

52  
53 Bone mineral density was measured by DEXA scanning of the femur (neck and hip) and  
54 lumbar spine or left forearm using the Lunar Prodigy DEXA (GE Lunar Corp., Madison, WI,  
55  
56  
57  
58  
59  
60

1  
2  
3 USA). Bone densitometry DEXA scans were carried out by the Department of Radiology, at  
4 Corbett Hospital, Dudley, UK. Lumbar spine scan was not carried out in patients who had  
5 previous spinal surgery. In those cases, assessment was performed at the left forearm site.  
6  
7 Results are presented as BMD ( $\text{g}/\text{cm}^2$ ), T-scores and Z-scores. Reference values for T-  
8 score were based on UK (ages 20-40) femur, spine or forearm reference population (v107).  
9  
10 Osteopenia was defined as a T-score between -1.0 and -2.5 SD, and osteoporosis as a T-  
11 score at or below -2.5 SD. Measurements of height, weight and body mass index (BMI) were  
12 also performed. The BMI scores were categorised according to the World Health  
13 Organisation key cut-off points as  $<18.5$  (underweight),  $\geq 18.5$  and  $\leq 24.9$  (normal weight),  $\geq$   
14  $25$  and  $\leq 29.9$  (overweight), and  $\geq 30 \text{ kg}/\text{m}^2$  (obese). The 10-year probability of fracture was  
15 calculated based on the Fracture Risk Assessment Tool (FRAX).[19] In addition to the BMD  
16 value or T-score (femoral neck), this tool takes into account clinical risk factors for the  
17 development of osteoporotic or hip fractures such as previous fractures, history of hip  
18 fracture in the patient's parents and hypogonadism, among other factors.  
19  
20  
21  
22  
23  
24  
25  
26  
27  
28  
29  
30  
31  
32

### 33 **Data analysis**

34  
35 Kolmogorov-Smirnov test was performed to test distribution of numerical data, followed by  
36 the appropriate statistical tests. Comparisons between groups were carried out with the  
37 Mann-Whitney test. Data is reported as median (minimum-maximum). The 95% confidence  
38 intervals for the TT and FT median values were calculated for comparison with normal  
39 reference values. Statistical significance was judged at 5% level. Statistical tests were  
40 performed using Predictive Analytics SoftWare (PASW) (version 18.0, SPSS Inc., Chicago,  
41 IL, USA).  
42  
43  
44  
45  
46  
47  
48  
49  
50

## 51 **RESULTS**

### 52 **Assessment of Sex Hormones**

53  
54  
55 The median age at the time of blood collection was 58 years (47-69). The median duration  
56  
57  
58  
59  
60

from implantation of the IDD system to hormone assay was 100 months (15-203) with an intrathecal opioid dose of 2.68 mg/day (range 1-9.7) (Table 1). The duration of pain prior to commencement of IDD was 9 years (range 3-35).

**Table 1.** Sample characteristics

|                               |                 |
|-------------------------------|-----------------|
| <b>Patients (N)</b>           | 20              |
| <b>Age (years)</b>            | 58 (47-69)      |
| <b>IDDS duration (months)</b> | 100 (15-203)    |
| <b>Opioid dose (mg/day)</b>   | 2.68 (1-9.7)    |
| <b>LH (IU/L)</b>              | 1.9 (0.2-19.9)  |
| <b>FSH (IU/L)</b>             | 5.3 (0.3-23.9)  |
| <b>SHBG (nmol/L)</b>          | 51 (17-123)     |
| <b>PRL (mU/L)</b>             | 225 (53-614)    |
| <b>TT (nmol/L)</b>            | 4.95 (1.2-18.8) |
| <b>FT (pmol/L)</b>            | 69.45 (14-328)  |

**Key:** LH - luteinizing hormone; FSH - follicle stimulating hormone; SHBG - sex hormone binding globulin; PRL - prolactin; TT – total testosterone; FT - free testosterone

Statistics are presented as median (minimum-maximum)

The median TT levels with 95% confidence intervals was 4.95 nmol/L (3.0-10.1), which were significantly lower than the cut-off level of 12 nmol/L for borderline/low testosterone. The median FT levels with 95% confidence intervals [69.45 (47.3-127.0)] were also significantly lower than the cut-off level of 180 pmol/L for low FT ( $t = -3.403$ ,  $p < 0.005$ ,  $r = 0.61$ ). The mean LH, FSH and SHBG concentrations were within the respective reference ranges. Prolactin levels were above the reference range in two patients. One of these patients had low TT and FT and the other patient presented borderline/low TT. Based on TT, 17 (85%) of the patients presented biochemical hypogonadism values with 12 (60%) at less than 8 nmol/L and 5 (25%) with TT values between 8 and 12 nmol/L (borderline/low). Based on FT calculations, 17 (85%) patients were biochemically hypogonadal with 15 (75%) at less than 180 pmol/L and two (10%) patients between 180 and 250 pmol/L. Only one of the patients had TT and FT values within quoted reference ranges, two patients presented borderline/low

1  
2  
3 TT and normal FT, one patient had low FT values and normal TT, and one borderline/low FT  
4 and normal TT.  
5  
6  
7

### 8 9 **Assessment of Bone Mineral Density**

10  
11 Considering that free testosterone reflects more accurately the clinical situation than total  
12 testosterone in plasma, [15] the 17 male patients diagnosed as hypogonadal through  
13 calculated FT were considered for assessment of bone mineral density. Three patients were  
14 excluded (one patient was excluded on the basis that the primary indication for IDD use was  
15 spinal osteoporosis, one patient had the intrathecal opioid therapy discontinued and one  
16 patient passed away.  
17  
18  
19  
20  
21  
22  
23  
24

25 The median age of the 14 patients at the time of BMD assessment was 62.5 years (48-70).  
26 All the patients investigated for BMD were Caucasian. The BMI score was 29.4 kg/m<sup>2</sup> (20.1-  
27 45.4). According to the BMI score, the majority of the patients (64.3%) were either  
28 overweight or obese and none of the patients were underweight.  
29  
30  
31  
32  
33  
34

35 Table 2 shows the results of the BMD assessment. Individual T-scores below -1.0 SD in at  
36 least one site were identified in 10 (71.4%) of the patients. Osteopenia defined as a T-score  
37 between -1.0 and -2.5 SD was observed in seven (50%) of the patients. Osteoporosis  
38 defined as a T-score at or below -2.5 SD was detected in three (21.4%) of the subjects.  
39  
40  
41  
42  
43 When considering the Z-scores, one (7.1%) of the participants presented a value at or below  
44 -2.5 SD indicating osteoporosis and four (28.6%) other patients Z-scores between -1.0 and -  
45 2.5 SD representative of osteopenia.  
46  
47  
48  
49  
50  
51  
52  
53  
54  
55  
56  
57  
58  
59  
60

**Table 2.** Bone Mineral Density measurements

| Site of measurement   | BMD (g/cm <sup>2</sup> ) | T-score            | Z-score            |
|-----------------------|--------------------------|--------------------|--------------------|
| Femoral neck (n = 14) | 0.925 (0.734 - 1.176)    | -1.10 (-2.6 - 0.8) | -0.10 (-1.9 - 2.0) |
| Total hip (n = 14)    | 0.947 (0.686 - 1.222)    | -1.10 (-3.1 - 1.0) | -0.40 (-2.6 - 1.9) |
| Forearm (n = 10)      | 0.736 (0.665 - 0.845)    | -0.40 (-3.2 - 1.2) | 0.30 (-2.4 - 1.7)  |
| Lumbar (n = 4)        | 1.185 (0.876 - 1.487)    | -0.40 (-2.4 - 2.0) | 0.00 (-1.9 - 2.3)  |

**Key:** BMD - Bone Mineral Density

Statistics are presented as median (minimum-maximum)

Seven of the subjects had T-scores below -1.0 SD in more than one assessed site (Table 3).

Three patients had either osteoporosis and/or osteopenia in two sites and four patients in three sites. Three of the patients presented Z-scores lower than -1.0 SD in three sites and one patient in two sites. No statistical differences were observed between the patients within normal reference range values and those with osteopenia or osteoporosis for age ( $p = 0.72$ ) or BMI ( $p = 0.48$ ).

**Table 3.** Bone Mineral Density outcomes

| Site of measurement   | Normal       | Osteopenia <sup>a</sup> | Osteoporosis <sup>b</sup> |
|-----------------------|--------------|-------------------------|---------------------------|
| Femoral neck (n = 14) | 7 / 14 (50%) | 5 / 14 (35.7%)          | 2 / 14 (14.3%)            |
| Total hip (n = 14)    | 7 / 14 (50%) | 4 / 14 (28.6%)          | 3 / 14 (21.4%)            |
| Forearm (n = 10)      | 7 / 10 (70%) | 2 / 10 (20%)            | 1 / 10 (10%)              |
| Lumbar (n = 4)        | 2 / 4 (50%)  | 2 / 4 (50%)             |                           |

<sup>a</sup> Osteopenia was defined as  $-2.5 \text{ SD} < \text{T-score} < -1.0 \text{ SD}$

<sup>b</sup> Osteoporosis was defined as  $\text{T-score} \leq -2.5 \text{ SD}$

Values represent the number of patients/total patients (%)

Several known clinical risk factors for low bone mineral density were present in this sample including hypogonadism in all of the patients. Investigation of osteoporosis related fractures through x-rays were not performed. Although the patients in the studied group did not report any incident fractures, assessment of the ten-year probability of major osteoporotic or hip fracture based on the FRAX tool indicated a median probability of 5.7% (2.3-17) for major osteoporotic fracture and 1.1% (0.1-11) for hip fracture. Five (35.7%) of the patients were at or above the intervention threshold for hip fracture.

## DISCUSSION

Our study showed that 85% of male patients on intrathecal opioid therapy were biochemically hypogonadal. The serum gonadotropin (LH and FSH) levels in these patients were inappropriately low or low-normal despite low serum testosterone concentrations, suggesting that testosterone suppression was caused through an inhibition of pituitary FSH and LH secretion (secondary hypogonadism). Raised serum prolactin may have contributed to the low testosterone in two patients. Although acute administration of morphine leads to an increase in PRL levels,[12] tolerance usually develops during chronic administration.[20] Previous studies investigating chronic administration of intrathecal morphine have also reported a small proportion of patients with elevated PRL levels.[17,21] In a group of cancer survivors on opioids, 90% exhibited hypogonadism and low testosterone levels; LH levels but not FSH levels were found to be significantly lower when compared with cancer survivors not on opioid therapy.[22] The important role of endogenous opioids in the control of LH secretion has been demonstrated [23] and suppression of the hypothalamic-pituitary-gonadal axis by intrathecal opioids may be caused by a similar mechanism to that of endogenous opioids.[24] Nevertheless, the suppression of LH levels may be less accentuated when the opioids are administered orally or transdermally rather than intrathecally.[12]

Several possible factors may affect the sexual function in this group of patients. Psychological aspects such as depression, passive coping strategies and catastrophising are some of the factors hypothesized to influence the sexual function in chronic pain patients.[25] However, chronic pain did not seem to be the cause of gonadal function reduction in patients undertaking intrathecal morphine therapy when compared with a control group of chronic pain patients who were not taking any form of opioid drugs.[24] Of the possible chronic illnesses identified in a longitudinal study with 890 male participants, only

1  
2  
3 cancer (9%) was associated with a greater decrease in testosterone levels than the  
4 decrease that occurred with ageing alone.[26]  
5  
6  
7

8  
9 Hypogonadism is an important risk factor for the development of osteoporosis in both  
10 sexes.[16] To our knowledge, the incidence of osteopaenia or osteoporosis in patients  
11 undertaking intrathecal opioid therapy has not been previously reported. In our study, 50% of  
12 patients had osteopenia and 21.4% had osteoporosis. Interestingly, an association between  
13 oral opioid administration and reduced BMD was demonstrated in one study but the  
14 presence or absence of hypogonadism was not assessed.[27] In a cross-sectional study,  
15 osteopenia was present in 50% of the male patients undertaking oral opioids [28] but again it  
16 was not clear if those patients were hypogonadal.  
17  
18  
19  
20  
21  
22  
23  
24  
25  
26

27 An association between oral opioid medication and an increase in fracture risk has also been  
28 reported [29] but assessment of bone mineral density was not performed. The authors  
29 suggested that this increase in fracture risk was possibly related to the risk of falls due to the  
30 central nervous system side effect of dizziness caused by oral opioids. Opioid-induced  
31 dizziness is less likely to occur in IDD patients since only a fraction of the opioid delivered  
32 via intrathecal route reaches the brain. Low bone mass is an important component of the risk  
33 of fracture as well as non-skeletal factors such as propensity to fall.[16,30] Many fragility  
34 fractures occur in the absence of osteoporosis, although in the presence of this disease, the  
35 risk of fracture is higher.[31] Osteoporotic fractures are a significant cause of morbidity and  
36 mortality especially in the developed countries,[32] and are associated with increased  
37 mortality, particularly in men.[33]  
38  
39  
40  
41  
42  
43  
44  
45  
46  
47  
48  
49  
50

51 The assumption that hypogonadism is a risk factor for decreased BMD has not always been  
52 confirmed in the literature. No association between age-related hypogonadism (based on  
53 total testosterone) and decreased BMD was found in elderly men.[34] In contrast, free  
54  
55  
56  
57  
58  
59  
60



1  
2  
3 testosterone (calculated according to the Vermeulen equation) was demonstrated to be an  
4 independent predictor of BMD and fractures in elderly men [35] and a positive predictor of  
5 cortical bone size in young men at the age of peak bone mass.[36] These contradictory  
6 findings may have occurred because free testosterone is more important physiologically than  
7 total testosterone. SHBG levels, which generally are genetically determined, seem to play an  
8 important role in bone mass, hence the reason for free testosterone to be a stronger  
9 predictor than total testosterone alone. Recently it has been suggested that SHBG levels in  
10 healthy adult men at the age of peak bone mass were positively associated with cortical  
11 bone size independently of sex-steroid levels.[37] However, in middle aged and elderly men,  
12 SHBG elevation was significantly associated with the occurrence of osteoporotic  
13 fractures.[38] Although not yet confirmed, it has been suggested that the effect of SHBG on  
14 BMD may change with age and/or testosterone sufficiency or deficiency.[39]

15  
16  
17  
18  
19  
20  
21  
22  
23  
24  
25  
26  
27  
28  
29 It is important to note the limitations of this study. A small number of patients were included  
30 without a control group. The gonadal status and bone mineral density were not evaluated  
31 prior to commencement of IDD therapy. Information on systemic opioids was not collected. A  
32 proportion of these patients are provided with oral opioid medication on an individual basis  
33 for occasional flare-ups. The strongest systemic opioid provided is tramadol at a dose  $\leq 400$   
34 mg/day. Women were not included in this study. Low libido and amenorrhea have been  
35 reported in female IDDS patients,[17,24] although the prevalence has been reported to be  
36 lower in women.[28] A large meta-analysis, which included approximately 39,000 men and  
37 women has concluded that the age-specific risk of hip fracture is similar in both men and  
38 women with the same BMD and age.[40] Despite these limitations, the results of BMD  
39 assessment suggest that the IDD population may have an increased risk for osteoporotic  
40 fractures.  
41  
42  
43  
44  
45  
46  
47  
48  
49  
50  
51  
52  
53  
54  
55  
56  
57  
58  
59  
60

1  
2  
3 It is important to provide appropriate treatment to patients with low BMD. FRAX analysis is a  
4 simple tool that can be used to identify of patients in whom osteoporosis prophylaxis is  
5 appropriate by taking into account multiple risk factors including BMD levels and  
6  
7 hypogonadism. BMD can be normalized and maintained within the normal range in men with  
8  
9 either primary or secondary hypogonadism by continuous, long-term hormonal replacement  
10  
11 therapy [41] though the full effect on BMD may take up to 24 months.[42] Opioid induced  
12  
13 hypogonadism may be reversible. Clinically significant improvements in hypogonadal  
14  
15 symptoms were observed in men with opioid induced androgen deficiency following  
16  
17 treatment with transdermal testosterone patches. [43] In patients undertaking intrathecal  
18  
19 opioid delivery, recovery of serum testosterone levels following cessation of therapy or  
20  
21 significant improvements in libido following hormonal replacement therapy have also been  
22  
23 reported.[17,24]  
24  
25  
26  
27  
28

29 Further studies in this patient group are warranted. Future studies should prospectively  
30  
31 evaluate the gonadal axis, reported sexual health of the participants and BMD. It would also  
32  
33 be important to compare these results with matched cohorts of chronic pain patients.  
34  
35 Potential comparisons include patients on systemic opioids only, on a different course of  
36  
37 intrathecal therapy (e.g. ziconotide) or patients using spinal cord stimulation for the  
38  
39 management of their chronic pain.  
40  
41  
42

43 This study suggests an important association between hypogonadism and low bone mass  
44  
45 density in patients undertaking intrathecal opioid delivery for the management of chronic  
46  
47 non-malignant pain. However, since the gonadal status and BMD were not determined prior  
48  
49 to initiation of intrathecal opioid delivery, we cannot conclude that the decreased BMD was  
50  
51 caused by hypogonadism or opioid administration. Early detection of hypogonadism followed  
52  
53 by appropriate treatment may be paramount to reduce the risk of osteoporosis development  
54  
55  
56  
57  
58  
59  
60

1  
2  
3 and prevention of fractures in this population. Furthermore, surveillance of BMD levels in  
4  
5 hypogonadal intrathecal opioid delivery patients should be considered.  
6  
7  
8  
9  
10  
11  
12  
13  
14  
15  
16  
17  
18  
19  
20  
21  
22  
23  
24  
25  
26  
27  
28  
29  
30  
31  
32  
33  
34  
35  
36  
37  
38  
39  
40  
41  
42  
43  
44  
45  
46  
47  
48  
49  
50  
51  
52  
53  
54  
55  
56  
57  
58  
59  
60

For peer review only

## ARTICLE SUMMARY

### Article focus

- Hypogonadism is common in intrathecal opioid therapy patients but there is limited literature investigating bone mineral density in this population.
- We aimed to prospectively investigate if undiagnosed hypogonadism in intrathecal opioid therapy patients may result in low bone mineral density levels.

### Key messages

- Undiagnosed hypogonadism in intrathecal opioid therapy patients may lead to low bone mineral density levels.
- Hypogonadism and bone mineral density levels surveillance may be paramount to reduce the risk of osteoporosis and fractures in patients undertaking intrathecal opioid therapy.

### Strengths and limitations of this study

- To our knowledge, this is the first study to specifically address the potential decrease in bone mineral density as a consequence of long-term intrathecal opioid therapy.
- Further studies are warranted to assess the effectiveness of early detection and adequate treatment to prevent bone mineral density decrease and to investigate the value of hormonal replacement therapy to normalise bone mineral density levels.

### Acknowledgments

The authors are grateful to Dr Jane Dale from the Department of Endocrinology and Diabetes at Russells Hall Hospital for her comments on the final version of this manuscript.

### Funding statement

This research received no specific grant from any funding agency in the public, commercial or not-for-profit sectors.

### Competing interests statement

The authors report no conflicts of interest.

### Contributorship statement

RVD, JHR, JLS, MHL, AJW and RLA have made substantial contributions to (1) the conception and design of the study, or acquisition of data, or analysis and interpretation of data; (2) drafting the article or revising it critically for important intellectual content; and (3) final approval of the version to be submitted.

### Ethics approval

All assessments were performed as part of routine clinical care. No additional procedures were carried out for research purposes.

### REFERENCES

- 1 Onofrio BM, Yaksh TL, Arnold PG. Continuous low-dose intrathecal morphine administration in the treatment of chronic pain of malignant origin. *Mayo Clin Proc* 1981;56:516-20.
- 2 Grady K, Raphael J. Spinal administration. In: Rice A. ed. *Textbook of Clinical Pain Management: Chronic Volume*. London: Hodder Arnold 2008:284-91.
- 3 Nordberg G, Hedner T, Mellstrand T, et al. Pharmacokinetic aspects of intrathecal morphine analgesia. *Anesthesiology* 1984;60:448-54.
- 4 Bernards C. Cerebrospinal fluid and spinal cord distribution of baclofen and bupivacaine during slow intrathecal infusion in pigs. *Anesthesiology* 2006;105:169-178.
- 5 Duarte RV, Raphael JH, Sparkes E, et al. Long-term intrathecal drug administration for chronic nonmalignant pain. *J Neurosurg Anesthesiol* 2012;24:63-70.
- 6 Duarte RV, Raphael JH, Haque MS, et al. A predictive model for intrathecal opioid dose escalation for chronic non-cancer pain. *Pain Physician* 2012;15:363-69.

- 1  
2  
3 7 Doleys D, Dinoff B, Page L, et al. Sexual dysfunction and other side effects of intraspinal  
4 opiate use in the management of chronic non-cancer pain. *American Journal of Pain*  
5 *Management* 1998;8:5-11.  
6  
7  
8  
9 8 Reddy RG, Aung T, Karavitaki N, et al. Opioid induced hypogonadism. *BMJ*  
10 2010;341:c4462.  
11  
12  
13 9 Duarte RV, Raphael JH, Mourad Labib, et al. Prevalence and influence of diagnostic  
14 criteria in the assessment of hypogonadism in intrathecal opioid therapy patients. *Pain*  
15 *Physician* 2013;16:9-14.  
16  
17  
18  
19 10 Katz N, Mazer NA. The impact of opioids on the endocrine system. *Clin J Pain*  
20 2009;25:170-5.  
21  
22  
23 11 Petak SM, Nankin HR, Spark RF, et al. American Association of Clinical Endocrinologists  
24 Medical Guidelines for clinical practice for the evaluation and treatment of hypogonadism  
25 in adult male patients - 2002 update. *Endocr Pract* 2002;8:440-56.  
26  
27  
28  
29 12 Vuong C, Van Uum SHM, O'Dell LE, et al. The effects of opioids and opioid analogs on  
30 animal and human endocrine systems. *Endocr Rev* 2010;31:98-132.  
31  
32  
33 13 Schulz R, Wilhelm A, Pirke KM, et al. Beta-endorphin and dynorphin control serum  
34 luteinizing hormone level in immature female rats. *Nature* 1981;294:757-9.  
35  
36  
37 14 Pfeiffer DG, Pfeiffer A, Shimohigashi Y, et al. Predominant involvement of mu-rather than  
38 delta- or kappa-opiate receptors in LH secretion. *Peptides* 1983;4:647-9.  
39  
40  
41 15 Vermeulen A, Verdonck L, Kaufman JM. A critical evaluation of simple methods for the  
42 estimation of free testosterone in serum. *J Clin Endocrinol Metab* 1999;84:3666-72.  
43  
44  
45 16 Kanis JA. Diagnosis of osteoporosis and assessment of fracture risk. *Lancet*  
46 2002;359:1929-36.  
47  
48  
49 17 Abs R, Verhelst J, Maeyaert J, et al. Endocrine consequences of long-term intrathecal  
50 administration of opioids. *J Clin Endocrinol Metab* 2000;85:2215-22.  
51  
52  
53 18 Hackett G, Cole NS, Deshpande AA, et al. Biochemical hypogonadism in men with type 2  
54 diabetes in primary care practice. *Br J Diabetes Vasc Dis* 2009;9:226-31.  
55  
56  
57  
58  
59  
60

- 1  
2  
3 19 Kanis JA, Johnell O, Oden A, et al. FRAX and the assessment of fracture probability in  
4 men and women from the UK. *Osteoporos Int* 2008;19:385-97.  
5  
6  
7 20 Morley JE. The endocrinology of the opiates and opioid peptides. *Metabolism*  
8 1981;30:195-209.  
9  
10  
11 21 Paice JA, Penn RD, Ryan WG. Altered sexual function and decreased testosterone in  
12 patients receiving intraspinal opioids. *J Pain Symptom Manage* 1994;9:126-31.  
13  
14  
15 22 Rajagopal A, Vassilopoulou-Sellin R, Palmer JL, et al. Symptomatic hypogonadism in  
16 male survivors of cancer with chronic exposure to opioids. *Cancer* 2004;100:851-8.  
17  
18  
19 23 Genazzani AR, Genazzani AD, Volpogni C, et al. Opioid control of gonadotrophin  
20 secretion in humans. *Hum Reprod* 1993;8(Suppl 2):151-3.  
21  
22  
23 24 Finch P, Roberts L, Price L, et al. Hypogonadism in patients treated with intrathecal  
24 morphine. *Clin J Pain* 2000;16:251-4.  
25  
26  
27 25 Monga TN, Tan G, Ostermann HJ, et al. Sexuality and sexual adjustment of patients with  
28 chronic pain. *Disabil Rehabil* 1998;20:317-29.  
29  
30  
31 26 Harman S, Metter E, Tobin J, et al. Longitudinal effects of aging on serum total and free  
32 testosterone levels in healthy men. *J Clin Endocrinol Metab* 2001;86:724-31.  
33  
34  
35 27 Kinjo M, Setoguchi S, Schneeweiss S, et al. Bone mineral density in subjects using  
36 central nervous system-active medications. *Am J Med* 2005;118:1414.  
37  
38  
39 28 Fraser LA, Morrison D, Morley-Forster P, et al. Oral opioids for chronic non-cancer pain:  
40 higher prevalence of hypogonadism in men than in women. *Exp Clin Endocrinol Diabetes*  
41 2009;117:38-43.  
42  
43  
44 29 Vestergaard P, Rejnmark L, Mosekilde L. Fracture risk associated with the use of  
45 morphine and opiates. *J Inter Med* 2006;260:76-87.  
46  
47  
48 30 Center JR, Nguyen TV, Sambrook PN, et al. Hormonal and biochemical parameters and  
49 osteoporotic fractures in elderly men. *J Bone Miner Res* 2000;15:05-1411.  
50  
51  
52 31 Kanis JA, Melton LJ, Christiansen C, et al. The diagnosis of osteoporosis. *J Bone Miner*  
53 Res 1994;9:1137-41.  
54  
55  
56  
57  
58  
59  
60

- 1  
2  
3 32 Johnell O, Kanis JA. An estimate of the worldwide prevalence and disability associated  
4 with osteoporotic fractures. *Osteoporos Int* 2006;17:1726-33.  
5  
6  
7 33 Center JR, Nguyen TV, Schneider D, et al. Mortality after all major types of osteoporotic  
8 fracture in men and women: an observational study. *Lancet* 1999;353:878-82.  
9  
10  
11 34 Amin S, Zhang Y, Sawin CT, et al. Association of hypogonadism and estradiol levels with  
12 bone mineral density in elderly men from the Framingham study. *Ann Intern Med*  
13 2000;133:951-63.  
14  
15  
16  
17 35 Mellström D, Johnell O, Ljunggren O, et al. Free testosterone is an independent predictor  
18 of BMD and prevalent fractures in elderly men: MrOS Sweden. *J Bone Miner Res*  
19 2006;21:529-35.  
20  
21  
22  
23 36 Lorentzon M, Swanson C, Andersson N, et al. Free testosterone is a positive, whereas  
24 free estradiol is a negative, predictor of cortical bone size in young Swedish men: the  
25 GOOD study. *J Bone Miner Res* 2005;20:1334-41.  
26  
27  
28  
29 37 Vanbillemont G, Lapauw B, Bogaert V, et al. Sex hormone-binding globulin as an  
30 independent determinant of cortical bone status in men at the age of peak bone mass. *J*  
31 *Clin Endocrinol Metab* 2010;95:1579-86.  
32  
33  
34  
35 38 Hoppé E, Bouvard B, Royer M, et al. Sex hormone-binding globulin in osteoporosis. *Joint*  
36 *Bone Spine* 2010;77:306-312.  
37  
38  
39 39 Khosla S. Sex hormone binding globulin: inhibitor or facilitator (or both) of sex steroid  
40 action? *J Clin Endocrinol Metab* 2006;91:4764-6.  
41  
42  
43  
44 40 Johnell O, Kanis JA, Oden A, et al. Predictive value of BMD for hip and other fractures. *J*  
45 *Bone Miner Res* 2005;20:1185-94.  
46  
47  
48 41 Katznelson L, Finkelstein JS, Schoenfeld DA, et al. Increase in bone density and lean  
49 body mass during testosterone administration in men with acquired hypogonadism. *J Clin*  
50 *Endocrinol Metab* 1996;81:4358-65.  
51  
52  
53  
54 42 Snyder PJ, Peachey H, Berlin JA, et al. Effects of testosterone replacement in  
55 hypogonadal men. *J Clin Endocrinol Metab* 2000;85:2670-77.  
56  
57  
58  
59  
60



1  
2  
3 43 Daniell HW, Lentz R, Mazer NA. Open-label pilot study of testosterone patch therapy in  
4  
5 men with opioid-induced androgen deficiency. J Pain 2006;7:200-10.  
6  
7  
8  
9  
10  
11  
12  
13  
14  
15  
16  
17  
18  
19  
20  
21  
22  
23  
24  
25  
26  
27  
28  
29  
30  
31  
32  
33  
34  
35  
36  
37  
38  
39  
40  
41  
42  
43  
44  
45  
46  
47  
48  
49  
50  
51  
52  
53  
54  
55  
56  
57  
58  
59  
60

For peer review only

1  
2  
3 **Hypogonadism and low bone mineral density in patients on long-term intrathecal**  
4 **opioid delivery therapy**

5  
6 Rui V. Duarte,<sup>1,2</sup> Jon H. Raphael,<sup>1,2</sup> Jane L. Southall,<sup>2</sup> Mourad H. Labib,<sup>3</sup> Andrew J.  
7 Whallett,<sup>4</sup> Robert L. Ashford<sup>1</sup>

8  
9 <sup>1</sup> Faculty of Health, Birmingham City University, Birmingham, UK

10 <sup>2</sup> Department of Pain Management, Russells Hall Hospital, Dudley, UK

11 <sup>3</sup> Department of Clinical Biochemistry, Russells Hall Hospital, Dudley, UK

12 <sup>4</sup> Department of Rheumatology, Russells Hall Hospital, Dudley, UK  
13  
14  
15  
16  
17

18 Name and address for correspondence: Rui V. Duarte, Faculty of Health, Birmingham City  
19 University, City South Campus, Room 220 Ravensbury House, B15 3TN, Birmingham,  
20 United Kingdom  
21  
22

23  
24 Tel.: +44 24768 88063; Fax: +44 0121 331 6076; Email: ruivduarte@gmail.com  
25  
26  
27

28 Keywords: bone density; chronic pain; hypogonadism; drug delivery systems, implantable  
29

30 Word count: 2,675  
31  
32  
33  
34  
35  
36  
37  
38  
39  
40  
41  
42  
43  
44  
45  
46  
47  
48  
49  
50  
51  
52  
53  
54  
55  
56  
57  
58  
59  
60

## ABSTRACT

### Objectives

This study aimed to investigate the hypothalamic-pituitary-gonadal axis in a sample of male patients undertaking intrathecal opioid delivery for the management of chronic non-malignant pain and the presence of osteopenia and/or osteoporosis in those diagnosed with hypogonadism.

### Design

Observational study using health data routinely collected for non-research purposes.

### Setting

Department of Pain Management, Russells Hall Hospital, Dudley, United Kingdom.

### Patients

Twenty consecutive male patients attending follow-up clinics for intrathecal opioid therapy had the gonadal axis evaluated by measuring their serum luteinising hormone, follicle stimulating hormone, total testosterone, sex hormone binding globulin and calculation of free testosterone. Bone mineral density was measured by DEXA scanning in those patients diagnosed with hypogonadism.

### Results

Based on calculated free testosterone concentrations, 17 (85%) patients had biochemical hypogonadism with 15 patients (75%) having free testosterone <180 pmol/L and 2 patients (10%) between 180 and 250 pmol/L. Bone mineral density was assessed in 14 of the 17 patients after the exclusion of 3 patients. Osteoporosis (defined as a T-score  $\leq$  -2.5 SD) was detected in three patients (21.4%) and osteopenia (defined as a T-score between -1.0 and -2.5 SD) was observed in seven patients (50%). Five of the 14 patients (35.7%) were at or above the intervention threshold for hip fracture.

### Conclusion

This study suggests an association between hypogonadism and low bone mass density in patients undertaking intrathecal opioid delivery for the management of chronic non-malignant pain. Surveillance of hypogonadism and bone mineral density levels followed by appropriate treatment may be paramount to reduce the risk of osteoporosis development and prevention of fractures in this group of patients.

## INTRODUCTION

Treatment strategies for the management of chronic pain start with the lowest risk and least invasive intervention and progress if a treatment is not effective. Intrathecal drug delivery

1  
2  
3 (IDD) is considered a last resort treatment for the management of severe chronic pain due to  
4 its invasive nature, concerns about long-term opioid use, and the possible complications  
5 related to this modality of treatment. Intrathecal spinal analgesia has become a recognized  
6 treatment for chronic non-malignant pain since the first reservoir was implanted in 1981.[1]  
7  
8 The use of opioids via intrathecal drug delivery allows for a selective concentration to reach  
9 an important site of pain transmission, the spinal cord dorsal horn.[2] Opioid administration  
10 into the intrathecal space achieves its effects at lower doses than using the epidural route.[3]  
11  
12 The drug is highly localized, so its analgesic efficacy is maximized at lower doses.[4]  
13  
14 Moreover, opioid dose escalation throughout the years may be modest.[5,6] These factors  
15 lead to a decrease in the possible opioid side-effects.  
16  
17  
18  
19  
20  
21  
22  
23  
24

25 The potential effect of intrathecal opioid delivery on the endocrine system is one of the least  
26 recognised and investigated.[7] Currently, opioid-induced hypogonadism is under-  
27 recognised and undertreated.[8,9] Some patients may attribute the signs and symptoms of  
28 hypogonadism; such as decreased libido, tiredness, loss of muscle mass and strength,  
29 among others, to the chronic pain and its related conditions rather than to the intrathecal  
30 medication.[7, 10] Moreover, symptoms of hypogonadism are often neither disclosed by the  
31 patient nor documented by the physician.[11] The current limited clinical awareness of the  
32 opioid effects on the endocrine system, together with the lack of information on their long-  
33 term consequences, is likely to result in a lack of information provision to the patient when  
34 long-term opioid therapy is being considered.[12]  
35  
36  
37  
38  
39  
40  
41  
42  
43  
44  
45  
46  
47

48 Animal studies suggest that opioids affect gonadotropin release via the inhibition of the  
49 gonadotropin releasing hormone (GnRH) by  $\beta$ -endorphin,[13] most likely at  $\mu$ -receptors.[14]  
50 This inhibition reduces the release of luteinizing hormone (LH) and follicle stimulating  
51 hormone (FSH) by the pituitary gland and consequently the production of testosterone by the  
52 gonads, resulting in hypogonadism and loss of libido. This is characterized by low or low-  
53  
54  
55  
56  
57  
58  
59  
60

1  
2  
3 normal LH and FSH levels, and low testosterone levels.[11] Most circulating testosterone is  
4 bound to sex hormone-binding globulin (SHBG). A lesser fraction is non-specifically bound to  
5 albumin and only a small percentage of testosterone is unbound.[15] Historically, free  
6 testosterone was thought to be the only biologically-active component. However,  
7 testosterone is weakly bound to serum albumin and dissociates freely in the capillary bed,  
8 and is readily available for tissue uptake. All non-SHBG-bound testosterone is therefore  
9 considered bioavailable.  
10

11  
12 Hypogonadism is an important risk factor for development of osteoporosis in both sexes, but  
13 opioids have not been considered as a risk factor.[16] To our knowledge, the assessment of  
14 BMD in patients undertaking intrathecal drug delivery is limited to one study which  
15 suggested a tendency towards decreased BMD in these patients but the prevalence of  
16 osteopenia or osteoporosis in these patients was not reported in this study.[17]  
17  
18

19  
20 The aim of this study was to investigate the hypothalamic-pituitary-gonadal axis in a sample  
21 of male patients undertaking intrathecal opioid delivery for the management of chronic non-  
22 malignant pain and to assess the prevalence of osteopenia and/or osteoporosis in those  
23 diagnosed with hypogonadism.  
24  
25  
26  
27  
28  
29  
30  
31  
32  
33  
34  
35  
36  
37  
38  
39  
40

## 41 **METHODS**

### 42 **Patients**

43  
44 Twenty consecutive male patients attending follow-up clinics for IDD therapy at Russells Hall  
45 Hospital, Dudley, UK, for the management of chronic non-cancer pain were included in this  
46 observational study using health data routinely collected for non-research purposes. All  
47 assessments were performed as part of routine clinical care. No additional procedures were  
48 carried out for research purposes. None of these patients received testosterone  
49 supplementation within the previous three months. The pain syndrome experienced by the  
50  
51  
52  
53  
54  
55  
56  
57  
58  
59  
60

1  
2  
3 patients was classified as nociceptive (58.8%), neuropathic (5.8%) and mixed nociceptive-  
4 neuropathic (35.3%). All the patients were receiving intrathecal opioids for the management  
5 of their pain. Intrathecal morphine was the only medication administered to 50% of the  
6 sample. In individual cases, other substances were added to the intrathecal medication, with  
7 combinations of morphine with bupivacaine (12.5%), morphine with bupivacaine and  
8 clonidine (25%), and morphine with bupivacaine and baclofen (12.5%).  
9  
10  
11  
12  
13  
14  
15  
16

### 17 **Laboratory Methods**

18  
19 Blood samples were collected between 8am and 11am during a seven-month period (April to  
20 October 2010), as part of routine clinical care, for the measurement of serum LH, FSH,  
21 prolactin (PRL), total testosterone (TT) and SHBG. All assays were carried out by the  
22 Department of Clinical Biochemistry at Russells Hall Hospital, Dudley, UK. LH, FSH, PRL  
23 and TT were measured according to the manufacturer's instructions by immuno-  
24 enzymometric fluorimetric assay on the Tosoh AIA 2000 LA analyser (Tosoh Bioscience  
25 N.V., Tessenderlo, Belgium). The inter-assay imprecision (%CV) quoted by the manufacturer  
26 was 2.6% for LH, 2.3% for FSH and 5.3% for testosterone. SHBG was measured according  
27 to the manufacturer's instructions by chemiluminescent immunometric assay on the Immulite  
28 2000 XPi analyser (Siemens Healthcare Diagnostics Ltd, Camberley, Surrey, UK). The inter-  
29 assay variability (%CV) for SHBG was 5%. Calculations of free testosterone (FT) were  
30 carried out using the Vermeulen equation.[15] The quoted reference ranges were: LH (2.2-  
31 13.3 IU/L), FSH (1-7 IU/L), SHBG (13-71 nmol/L) and PRL (0-445 mU/L). Serum TT < 8  
32 nmol/L and/or FT < 180 pmol/L was considered as biochemical hypogonadism. Serum TT 8  
33 – 12 nmol/L and/or FT 180-250 pmol/L was considered as borderline/low.[18]  
34  
35  
36  
37  
38  
39  
40  
41  
42  
43  
44  
45  
46  
47  
48  
49  
50

### 51 **Assessment of Bone Mineral Density**

52  
53 Bone mineral density was measured by DEXA scanning of the femur (neck and hip) and  
54 lumbar spine or left forearm using the Lunar Prodigy DEXA (GE Lunar Corp., Madison, WI,  
55  
56  
57  
58  
59  
60

1  
2  
3 USA). Bone densitometry DEXA scans were carried out by the Department of Radiology, at  
4 Corbett Hospital, Dudley, UK. Lumbar spine scan was not carried out in patients who had  
5 previous spinal surgery. In those cases, assessment was performed at the left forearm site.  
6  
7 Results are presented as BMD ( $\text{g}/\text{cm}^2$ ), T-scores and Z-scores. Reference values for T-  
8  
9 score were based on UK (ages 20-40) femur, spine or forearm reference population (v107).  
10  
11 Osteopenia was defined as a T-score between -1.0 and -2.5 SD, and osteoporosis as a T-  
12  
13 score at or below -2.5 SD. Measurements of height, weight and body mass index (BMI) were  
14  
15 also performed. The BMI scores were categorised according to the World Health  
16  
17 Organisation key cut-off points as  $<18.5$  (underweight),  $\geq 18.5$  and  $\leq 24.9$  (normal weight),  $\geq$   
18  
19  $25$  and  $\leq 29.9$  (overweight), and  $\geq 30 \text{ kg}/\text{m}^2$  (obese). The 10-year probability of fracture was  
20  
21 calculated based on the Fracture Risk Assessment Tool (FRAX).[19] In addition to the BMD  
22  
23 value or T-score (femoral neck), this tool takes into account clinical risk factors for the  
24  
25 development of osteoporotic or hip fractures such as previous fractures, history of hip  
26  
27 fracture in the patient's parents and hypogonadism, among other factors.  
28  
29  
30  
31  
32

### 33 **Data analysis**

34  
35 Kolmogorov-Smirnov test was performed to test distribution of numerical data, followed by  
36  
37 the appropriate statistical tests. Comparisons between groups were carried out with the  
38  
39 Mann-Whitney test. Data is reported as median (minimum-maximum). The 95% confidence  
40  
41 intervals for the TT and FT median values were calculated for comparison with normal  
42  
43 reference values. Statistical significance was judged at 5% level. Statistical tests were  
44  
45 performed using Predictive Analytics SoftWare (PASW) (version 18.0, SPSS Inc., Chicago,  
46  
47 IL, USA).  
48  
49  
50

## 51 **RESULTS**

### 52 **Assessment of Sex Hormones**

53  
54  
55 The median age at the time of blood collection was 58 years (47-69). The median duration  
56  
57  
58  
59  
60

from implantation of the IDD system to hormone assay was 100 months (15-203) with an intrathecal opioid dose of 2.68 mg/day (range 1-9.7) (Table 1). The duration of pain prior to commencement of IDD was 9 years (range 3-35).

**Table 1.** Sample characteristics

|                               |                 |
|-------------------------------|-----------------|
| <b>Patients (N)</b>           | 20              |
| <b>Age (years)</b>            | 58 (47-69)      |
| <b>IDDS duration (months)</b> | 100 (15-203)    |
| <b>Opioid dose (mg/day)</b>   | 2.68 (1-9.7)    |
| <b>LH (IU/L)</b>              | 1.9 (0.2-19.9)  |
| <b>FSH (IU/L)</b>             | 5.3 (0.3-23.9)  |
| <b>SHBG (nmol/L)</b>          | 51 (17-123)     |
| <b>PRL (mU/L)</b>             | 225 (53-614)    |
| <b>TT (nmol/L)</b>            | 4.95 (1.2-18.8) |
| <b>FT (pmol/L)</b>            | 69.45 (14-328)  |

**Key:** LH - luteinizing hormone; FSH - follicle stimulating hormone; SHBG - sex hormone binding globulin; PRL - prolactin; TT – total testosterone; FT - free testosterone

Statistics are presented as median (minimum-maximum)

The median TT levels with 95% confidence intervals was 4.95 nmol/L (3.0-10.1), which were significantly lower than the cut-off level of 12 nmol/L for borderline/low testosterone. The median FT levels with 95% confidence intervals [69.45 (47.3-127.0)] were also significantly lower than the cut-off level of 180 pmol/L for low FT ( $t = -3.403$ ,  $p < 0.005$ ,  $r = 0.61$ ). The mean LH, FSH and SHBG concentrations were within the respective reference ranges.

Prolactin levels were above the reference range in two patients. One of these patients had low TT and FT and the other patient presented borderline/low TT. Based on TT, 17 (85%) of the patients presented biochemical hypogonadism values with 12 (60%) at less than 8 nmol/L and 5 (25%) with TT values between 8 and 12 nmol/L (borderline/low). Based on FT calculations, 17 (85%) patients were biochemically hypogonadal with 15 (75%) at less than 180 pmol/L and two (10%) patients between 180 and 250 pmol/L. Only one of the patients had TT and FT values within quoted reference ranges, two patients presented borderline/low



1  
2  
3 TT and normal FT, one patient had low FT values and normal TT, and one borderline/low FT  
4 and normal TT.  
5  
6  
7

### 8 9 **Assessment of Bone Mineral Density**

10  
11 Considering that free testosterone reflects more accurately the clinical situation than total  
12 testosterone in plasma, [15] the 17 male patients diagnosed as hypogonadal through  
13 calculated FT were considered for assessment of bone mineral density. Three patients were  
14 excluded (one patient was excluded on the basis that the primary indication for IDD use was  
15 spinal osteoporosis, one patient had the intrathecal opioid therapy discontinued and one  
16 patient passed away.  
17  
18  
19  
20  
21  
22  
23  
24

25 The median age of the 14 patients at the time of BMD assessment was 62.5 years (48-70).

26  
27 All the patients investigated for BMD were Caucasian. The BMI score was 29.4 kg/m<sup>2</sup> (20.1-  
28 45.4). According to the BMI score, the majority of the patients (64.3%) were either  
29 overweight or obese and none of the patients were underweight.  
30  
31  
32  
33  
34

35 Table 2 shows the results of the BMD assessment. Individual T-scores below -1.0 SD in at  
36 least one site were identified in 10 (71.4%) of the patients. Osteopenia defined as a T-score  
37 between -1.0 and -2.5 SD was observed in seven (50%) of the patients. Osteoporosis  
38 defined as a T-score at or below -2.5 SD was detected in three (21.4%) of the subjects.  
39  
40 When considering the Z-scores, one (7.1%) of the participants presented a value at or below  
41 -2.5 SD indicating osteoporosis and four (28.6%) other patients Z-scores between -1.0 and -  
42 2.5 SD representative of osteopenia.  
43  
44  
45  
46  
47  
48  
49  
50  
51  
52  
53  
54  
55  
56  
57  
58  
59  
60

**Table 2.** Bone Mineral Density measurements

| Site of measurement   | BMD (g/cm <sup>2</sup> ) | T-score            | Z-score            |
|-----------------------|--------------------------|--------------------|--------------------|
| Femoral neck (n = 14) | 0.925 (0.734 - 1.176)    | -1.10 (-2.6 - 0.8) | -0.10 (-1.9 - 2.0) |
| Total hip (n = 14)    | 0.947 (0.686 - 1.222)    | -1.10 (-3.1 - 1.0) | -0.40 (-2.6 - 1.9) |
| Forearm (n = 10)      | 0.736 (0.665 - 0.845)    | -0.40 (-3.2 - 1.2) | 0.30 (-2.4 - 1.7)  |
| Lumbar (n = 4)        | 1.185 (0.876 - 1.487)    | -0.40 (-2.4 - 2.0) | 0.00 (-1.9 - 2.3)  |

**Key:** BMD - Bone Mineral Density

Statistics are presented as median (minimum-maximum)

Seven of the subjects had T-scores below -1.0 SD in more than one assessed site (Table 3).

Three patients had either osteoporosis and/or osteopenia in two sites and four patients in three sites. Three of the patients presented Z-scores lower than -1.0 SD in three sites and one patient in two sites. No statistical differences were observed between the patients within normal reference range values and those with osteopenia or osteoporosis for age ( $p = 0.72$ ) or BMI ( $p = 0.48$ ).

**Table 3.** Bone Mineral Density outcomes

| Site of measurement   | Normal       | Osteopenia <sup>a</sup> | Osteoporosis <sup>b</sup> |
|-----------------------|--------------|-------------------------|---------------------------|
| Femoral neck (n = 14) | 7 / 14 (50%) | 5 / 14 (35.7%)          | 2 / 14 (14.3%)            |
| Total hip (n = 14)    | 7 / 14 (50%) | 4 / 14 (28.6%)          | 3 / 14 (21.4%)            |
| Forearm (n = 10)      | 7 / 10 (70%) | 2 / 10 (20%)            | 1 / 10 (10%)              |
| Lumbar (n = 4)        | 2 / 4 (50%)  | 2 / 4 (50%)             |                           |

<sup>a</sup> Osteopenia was defined as  $-2.5 \text{ SD} < \text{T-score} < -1.0 \text{ SD}$

<sup>b</sup> Osteoporosis was defined as  $\text{T-score} \leq -2.5 \text{ SD}$

Values represent the number of patients/total patients (%)

Several known clinical risk factors for low bone mineral density were present in this sample including hypogonadism in all of the patients. *Investigation of osteoporosis related fractures through x-rays were not performed.* Although the patients in the studied group did not report any incident fractures, assessment of the ten-year probability of major osteoporotic or hip fracture based on the FRAX tool indicated a median probability of 5.7% (2.3-17) for major osteoporotic fracture and 1.1% (0.1-11) for hip fracture. Five (35.7%) of the patients were at or above the intervention threshold for hip fracture.

## DISCUSSION

Our study showed that 85% of male patients on intrathecal opioid therapy were biochemically hypogonadal. The serum gonadotropin (LH and FSH) levels in these patients were inappropriately low or low-normal despite low serum testosterone concentrations, suggesting that testosterone suppression was caused through an inhibition of pituitary FSH and LH secretion (secondary hypogonadism). Raised serum prolactin may have contributed to the low testosterone in two patients. Although acute administration of morphine leads to an increase in PRL levels,[12] tolerance usually develops during chronic administration.[20] Previous studies investigating chronic administration of intrathecal morphine have also reported a small proportion of patients with elevated PRL levels.[17,21] In a group of cancer survivors on opioids, 90% exhibited hypogonadism and low testosterone levels; LH levels but not FSH levels were found to be significantly lower when compared with cancer survivors not on opioid therapy.[22] The important role of endogenous opioids in the control of LH secretion has been demonstrated [23] and suppression of the hypothalamic-pituitary-gonadal axis by intrathecal opioids may be caused by a similar mechanism to that of endogenous opioids.[24] Nevertheless, the suppression of LH levels may be less accentuated when the opioids are administered orally or transdermally rather than intrathecally.[12]

Several possible factors may affect the sexual function in this group of patients. Psychological aspects such as depression, passive coping strategies and catastrophising are some of the factors hypothesized to influence the sexual function in chronic pain patients.[25] However, chronic pain did not seem to be the cause of gonadal function reduction in patients undertaking intrathecal morphine therapy when compared with a control group of chronic pain patients who were not taking any form of opioid drugs.[24] Of the possible chronic illnesses identified in a longitudinal study with 890 male participants, only

1  
2  
3 cancer (9%) was associated with a greater decrease in testosterone levels than the  
4 decrease that occurred with ageing alone.[26]  
5  
6  
7

8  
9 Hypogonadism is an important risk factor for the development of osteoporosis in both  
10 sexes.[16] To our knowledge, the incidence of osteopaenia or osteoporosis in patients  
11 undertaking intrathecal opioid therapy has not been previously reported. In our study, 50% of  
12 patients had osteopenia and 21.4% had osteoporosis. Interestingly, an association between  
13 oral opioid administration and reduced BMD was demonstrated in one study but the  
14 presence or absence of hypogonadism was not assessed.[27] In a cross-sectional study,  
15 osteopenia was present in 50% of the male patients undertaking oral opioids [28] but again it  
16 was not clear if those patients were hypogonadal.  
17  
18  
19  
20  
21  
22  
23  
24  
25  
26

27 An association between oral opioid medication and an increase in fracture risk has also been  
28 reported [29] but assessment of bone mineral density was not performed. The authors  
29 suggested that this increase in fracture risk was possibly related to the risk of falls due to the  
30 central nervous system side effect of dizziness caused by oral opioids. Opioid-induced  
31 dizziness is less likely to occur in IDD patients since only a fraction of the opioid delivered  
32 via intrathecal route reaches the brain. Low bone mass is an important component of the risk  
33 of fracture as well as non-skeletal factors such as propensity to fall.[16,30] Many fragility  
34 fractures occur in the absence of osteoporosis, although in the presence of this disease, the  
35 risk of fracture is higher.[31] Osteoporotic fractures are a significant cause of morbidity and  
36 mortality especially in the developed countries,[32] and are associated with increased  
37 mortality, particularly in men.[33]  
38  
39  
40  
41  
42  
43  
44  
45  
46  
47  
48  
49  
50

51 The assumption that hypogonadism is a risk factor for decreased BMD has not always been  
52 confirmed in the literature. No association between age-related hypogonadism (based on  
53 total testosterone) and decreased BMD was found in elderly men.[34] In contrast, free  
54  
55  
56  
57  
58  
59  
60

1  
2  
3 testosterone (calculated according to the Vermeulen equation) was demonstrated to be an  
4 independent predictor of BMD and fractures in elderly men [35] and a positive predictor of  
5 cortical bone size in young men at the age of peak bone mass.[36] These contradictory  
6 findings may have occurred because free testosterone is more important physiologically than  
7 total testosterone. SHBG levels, which generally are genetically determined, seem to play an  
8 important role in bone mass, hence the reason for free testosterone to be a stronger  
9 predictor than total testosterone alone. Recently it has been suggested that SHBG levels in  
10 healthy adult men at the age of peak bone mass were positively associated with cortical  
11 bone size independently of sex-steroid levels.[37] However, in middle aged and elderly men,  
12 SHBG elevation was significantly associated with the occurrence of osteoporotic  
13 fractures.[38] Although not yet confirmed, it has been suggested that the effect of SHBG on  
14 BMD may change with age and/or testosterone sufficiency or deficiency.[39]

15  
16  
17  
18  
19  
20  
21  
22  
23  
24  
25  
26  
27  
28  
29 It is important to note the limitations of this study. A small number of patients were included  
30 without a control group. The gonadal status and bone mineral density were not evaluated  
31 prior to commencement of IDD therapy. Information on systemic opioids was not collected. A  
32 proportion of these patients are provided with oral opioid medication on an individual basis  
33 for occasional flare-ups. The strongest systemic opioid provided is tramadol at a dose  $\leq 400$   
34 mg/day. Women were not included in this study. Low libido and amenorrhea have been  
35 reported in female IDDS patients,[17,24] although the prevalence has been reported to be  
36 lower in women.[28] A large meta-analysis, which included approximately 39,000 men and  
37 women has concluded that the age-specific risk of hip fracture is similar in both men and  
38 women with the same BMD and age.[40] Despite these limitations, the results of BMD  
39 assessment suggest that the IDD population may have an increased risk for osteoporotic  
40 fractures.  
41  
42  
43  
44  
45  
46  
47  
48  
49  
50  
51  
52  
53  
54  
55  
56  
57  
58  
59  
60

1  
2  
3 It is important to provide appropriate treatment to patients with low BMD. FRAX analysis is a  
4 simple tool that can be used to identify of patients in whom osteoporosis prophylaxis is  
5 appropriate by taking into account multiple risk factors including BMD levels and  
6  
7 hypogonadism. BMD can be normalized and maintained within the normal range in men with  
8  
9 either primary or secondary hypogonadism by continuous, long-term hormonal replacement  
10  
11 therapy [41] though the full effect on BMD may take up to 24 months.[42] Opioid induced  
12  
13 hypogonadism may be reversible. Clinically significant improvements in hypogonadal  
14  
15 symptoms were observed in men with opioid induced androgen deficiency following  
16  
17 treatment with transdermal testosterone patches. [43] In patients undertaking intrathecal  
18  
19 opioid delivery, recovery of serum testosterone levels following cessation of therapy or  
20  
21 significant improvements in libido following hormonal replacement therapy have also been  
22  
23 reported.[17,24]  
24  
25  
26  
27

28  
29 Further studies in this patient group are warranted. Future studies should prospectively  
30  
31 evaluate the gonadal axis, reported sexual health of the participants and BMD. It would also  
32  
33 be important to compare these results with matched cohorts of chronic pain patients.  
34  
35 Potential comparisons include patients on systemic opioids only, on a different course of  
36  
37 intrathecal therapy (e.g. ziconotide) or patients using spinal cord stimulation for the  
38  
39 management of their chronic pain.  
40  
41  
42

43  
44 This study suggests an important association between hypogonadism and low bone mass  
45  
46 density in patients undertaking intrathecal opioid delivery for the management of chronic  
47  
48 non-malignant pain. However, since the gonadal status and BMD were not determined prior  
49  
50 to initiation of intrathecal opioid delivery, we cannot conclude that the decreased BMD was  
51  
52 caused by hypogonadism or opioid administration. Early detection of hypogonadism followed  
53  
54 by appropriate treatment may be paramount to reduce the risk of osteoporosis development  
55  
56  
57  
58  
59  
60

1  
2  
3 and prevention of fractures in this population. Furthermore, surveillance of BMD levels in  
4  
5 hypogonadal intrathecal opioid delivery patients should be considered.  
6  
7  
8  
9  
10  
11  
12  
13  
14  
15  
16  
17  
18  
19  
20  
21  
22  
23  
24  
25  
26  
27  
28  
29  
30  
31  
32  
33  
34  
35  
36  
37  
38  
39  
40  
41  
42  
43  
44  
45  
46  
47  
48  
49  
50  
51  
52  
53  
54  
55  
56  
57  
58  
59  
60

For peer review only

## ARTICLE SUMMARY

### Article focus

- Hypogonadism is common in intrathecal opioid therapy patients but there is limited literature investigating bone mineral density in this population.
- We aimed to prospectively investigate if undiagnosed hypogonadism in intrathecal opioid therapy patients may result in low bone mineral density levels.

### Key messages

- Undiagnosed hypogonadism in intrathecal opioid therapy patients may lead to low bone mineral density levels.
- Hypogonadism and bone mineral density levels surveillance may be paramount to reduce the risk of osteoporosis and fractures in patients undertaking intrathecal opioid therapy.

### Strengths and limitations of this study

- To our knowledge, this is the first study to specifically address the potential decrease in bone mineral density as a consequence of long-term intrathecal opioid therapy.
- Further studies are warranted to assess the effectiveness of early detection and adequate treatment to prevent bone mineral density decrease and to investigate the value of hormonal replacement therapy to normalise bone mineral density levels.

### Acknowledgments

The authors are grateful to Dr Jane Dale from the Department of Endocrinology and Diabetes at Russells Hall Hospital for her comments on the final version of this manuscript.

### Funding statement

This research received no specific grant from any funding agency in the public, commercial or not-for-profit sectors.



### Competing interests statement

The authors report no conflicts of interest.

### Contributorship statement

RVD, JHR, JLS, MHL, AJW and RLA have made substantial contributions to (1) the conception and design of the study, or acquisition of data, or analysis and interpretation of data; (2) drafting the article or revising it critically for important intellectual content; and (3) final approval of the version to be submitted.

### Ethics approval

All assessments were performed as part of routine clinical care. No additional procedures were carried out for research purposes.

### REFERENCES

- 1 Onofrio BM, Yaksh TL, Arnold PG. Continuous low-dose intrathecal morphine administration in the treatment of chronic pain of malignant origin. *Mayo Clin Proc* 1981;56:516-20.
- 2 Grady K, Raphael J. Spinal administration. In: Rice A. ed. *Textbook of Clinical Pain Management: Chronic Volume*. London: Hodder Arnold 2008:284-91.
- 3 Nordberg G, Hedner T, Mellstrand T, et al. Pharmacokinetic aspects of intrathecal morphine analgesia. *Anesthesiology* 1984;60:448-54.
- 4 Bernards C. Cerebrospinal fluid and spinal cord distribution of baclofen and bupivacaine during slow intrathecal infusion in pigs. *Anesthesiology* 2006;105:169-178.
- 5 Duarte RV, Raphael JH, Sparkes E, et al. Long-term intrathecal drug administration for chronic nonmalignant pain. *J Neurosurg Anesthesiol* 2012;24:63-70.
- 6 Duarte RV, Raphael JH, Haque MS, et al. A predictive model for intrathecal opioid dose escalation for chronic non-cancer pain. *Pain Physician* 2012;15:363-69.

- 1  
2  
3 7 Doleys D, Dinoff B, Page L, et al. Sexual dysfunction and other side effects of intraspinal  
4 opiate use in the management of chronic non-cancer pain. *American Journal of Pain*  
5 *Management* 1998;8:5-11.  
6  
7  
8  
9 8 Reddy RG, Aung T, Karavitaki N, et al. Opioid induced hypogonadism. *BMJ*  
10 2010;341:c4462.  
11  
12  
13 9 Duarte RV, Raphael JH, Mourad Labib, et al. Prevalence and influence of diagnostic  
14 criteria in the assessment of hypogonadism in intrathecal opioid therapy patients. *Pain*  
15 *Physician* 2013;16:9-14.  
16  
17  
18  
19 10 Katz N, Mazer NA. The impact of opioids on the endocrine system. *Clin J Pain*  
20 2009;25:170-5.  
21  
22  
23 11 Petak SM, Nankin HR, Spark RF, et al. American Association of Clinical Endocrinologists  
24 Medical Guidelines for clinical practice for the evaluation and treatment of hypogonadism  
25 in adult male patients - 2002 update. *Endocr Pract* 2002;8:440-56.  
26  
27  
28  
29 12 Vuong C, Van Uum SHM, O'Dell LE, et al. The effects of opioids and opioid analogs on  
30 animal and human endocrine systems. *Endocr Rev* 2010;31:98-132.  
31  
32  
33 13 Schulz R, Wilhelm A, Pirke KM, et al. Beta-endorphin and dynorphin control serum  
34 luteinizing hormone level in immature female rats. *Nature* 1981;294:757-9.  
35  
36  
37 14 Pfeiffer DG, Pfeiffer A, Shimohigashi Y, et al. Predominant involvement of mu-rather than  
38 delta- or kappa-opiate receptors in LH secretion. *Peptides* 1983;4:647-9.  
39  
40  
41 15 Vermeulen A, Verdonck L, Kaufman JM. A critical evaluation of simple methods for the  
42 estimation of free testosterone in serum. *J Clin Endocrinol Metab* 1999;84:3666-72.  
43  
44  
45 16 Kanis JA. Diagnosis of osteoporosis and assessment of fracture risk. *Lancet*  
46 2002;359:1929-36.  
47  
48  
49 17 Abs R, Verhelst J, Maeyaert J, et al. Endocrine consequences of long-term intrathecal  
50 administration of opioids. *J Clin Endocrinol Metab* 2000;85:2215-22.  
51  
52  
53 18 Hackett G, Cole NS, Deshpande AA, et al. Biochemical hypogonadism in men with type 2  
54 diabetes in primary care practice. *Br J Diabetes Vasc Dis* 2009;9:226-31.  
55  
56  
57  
58  
59  
60

- 1  
2  
3 19 Kanis JA, Johnell O, Oden A, et al. FRAX and the assessment of fracture probability in  
4 men and women from the UK. *Osteoporos Int* 2008;19:385-97.  
5  
6  
7 20 Morley JE. The endocrinology of the opiates and opioid peptides. *Metabolism*  
8 1981;30:195-209.  
9  
10  
11 21 Paice JA, Penn RD, Ryan WG. Altered sexual function and decreased testosterone in  
12 patients receiving intraspinal opioids. *J Pain Symptom Manage* 1994;9:126-31.  
13  
14  
15 22 Rajagopal A, Vassilopoulou-Sellin R, Palmer JL, et al. Symptomatic hypogonadism in  
16 male survivors of cancer with chronic exposure to opioids. *Cancer* 2004;100:851-8.  
17  
18  
19 23 Genazzani AR, Genazzani AD, Volpogni C, et al. Opioid control of gonadotrophin  
20 secretion in humans. *Hum Reprod* 1993;8(Suppl 2):151-3.  
21  
22  
23 24 Finch P, Roberts L, Price L, et al. Hypogonadism in patients treated with intrathecal  
24 morphine. *Clin J Pain* 2000;16:251-4.  
25  
26  
27 25 Monga TN, Tan G, Ostermann HJ, et al. Sexuality and sexual adjustment of patients with  
28 chronic pain. *Disabil Rehabil* 1998;20:317-29.  
29  
30  
31 26 Harman S, Metter E, Tobin J, et al. Longitudinal effects of aging on serum total and free  
32 testosterone levels in healthy men. *J Clin Endocrinol Metab* 2001;86:724-31.  
33  
34  
35 27 Kinjo M, Setoguchi S, Schneeweiss S, et al. Bone mineral density in subjects using  
36 central nervous system-active medications. *Am J Med* 2005;118:1414.  
37  
38  
39 28 Fraser LA, Morrison D, Morley-Forster P, et al. Oral opioids for chronic non-cancer pain:  
40 higher prevalence of hypogonadism in men than in women. *Exp Clin Endocrinol Diabetes*  
41 2009;117:38-43.  
42  
43  
44 29 Vestergaard P, Rejnmark L, Mosekilde L. Fracture risk associated with the use of  
45 morphine and opiates. *J Inter Med* 2006;260:76-87.  
46  
47  
48 30 Center JR, Nguyen TV, Sambrook PN, et al. Hormonal and biochemical parameters and  
49 osteoporotic fractures in elderly men. *J Bone Miner Res* 2000;15:05-1411.  
50  
51  
52 31 Kanis JA, Melton LJ, Christiansen C, et al. The diagnosis of osteoporosis. *J Bone Miner*  
53 Res 1994;9:1137-41.  
54  
55  
56  
57  
58  
59  
60

- 1  
2  
3 32 Johnell O, Kanis JA. An estimate of the worldwide prevalence and disability associated  
4 with osteoporotic fractures. *Osteoporos Int* 2006;17:1726-33.  
5  
6  
7 33 Center JR, Nguyen TV, Schneider D, et al. Mortality after all major types of osteoporotic  
8 fracture in men and women: an observational study. *Lancet* 1999;353:878-82.  
9  
10  
11 34 Amin S, Zhang Y, Sawin CT, et al. Association of hypogonadism and estradiol levels with  
12 bone mineral density in elderly men from the Framingham study. *Ann Intern Med*  
13 2000;133:951-63.  
14  
15  
16  
17 35 Mellström D, Johnell O, Ljunggren O, et al. Free testosterone is an independent predictor  
18 of BMD and prevalent fractures in elderly men: MrOS Sweden. *J Bone Miner Res*  
19 2006;21:529-35.  
20  
21  
22  
23 36 Lorentzon M, Swanson C, Andersson N, et al. Free testosterone is a positive, whereas  
24 free estradiol is a negative, predictor of cortical bone size in young Swedish men: the  
25 GOOD study. *J Bone Miner Res* 2005;20:1334-41.  
26  
27  
28  
29 37 Vanbillemont G, Lapauw B, Bogaert V, et al. Sex hormone-binding globulin as an  
30 independent determinant of cortical bone status in men at the age of peak bone mass. *J*  
31 *Clin Endocrinol Metab* 2010;95:1579-86.  
32  
33  
34  
35 38 Hoppé E, Bouvard B, Royer M, et al. Sex hormone-binding globulin in osteoporosis. *Joint*  
36 *Bone Spine* 2010;77:306-312.  
37  
38  
39 39 Khosla S. Sex hormone binding globulin: inhibitor or facilitator (or both) of sex steroid  
40 action? *J Clin Endocrinol Metab* 2006;91:4764-6.  
41  
42  
43  
44 40 Johnell O, Kanis JA, Oden A, et al. Predictive value of BMD for hip and other fractures. *J*  
45 *Bone Miner Res* 2005;20:1185-94.  
46  
47  
48 41 Katznelson L, Finkelstein JS, Schoenfeld DA, et al. Increase in bone density and lean  
49 body mass during testosterone administration in men with acquired hypogonadism. *J Clin*  
50 *Endocrinol Metab* 1996;81:4358-65.  
51  
52  
53  
54 42 Snyder PJ, Peachey H, Berlin JA, et al. Effects of testosterone replacement in  
55 hypogonadal men. *J Clin Endocrinol Metab* 2000;85:2670-77.  
56  
57  
58  
59  
60

1  
2  
3 43 Daniell HW, Lentz R, Mazer NA. Open-label pilot study of testosterone patch therapy in  
4  
5 men with opioid-induced androgen deficiency. J Pain 2006;7:200-10.  
6  
7  
8  
9  
10  
11  
12  
13  
14  
15  
16  
17  
18  
19  
20  
21  
22  
23  
24  
25  
26  
27  
28  
29  
30  
31  
32  
33  
34  
35  
36  
37  
38  
39  
40  
41  
42  
43  
44  
45  
46  
47  
48  
49  
50  
51  
52  
53  
54  
55  
56  
57  
58  
59  
60

For peer review only

## STROBE Statement—checklist of items that should be included in reports of observational studies

|                              | Item No | Recommendation                                                                                                                                                                                                                                                                                                                                                                                                                                                                                                                                                                                                                                                                                                   |
|------------------------------|---------|------------------------------------------------------------------------------------------------------------------------------------------------------------------------------------------------------------------------------------------------------------------------------------------------------------------------------------------------------------------------------------------------------------------------------------------------------------------------------------------------------------------------------------------------------------------------------------------------------------------------------------------------------------------------------------------------------------------|
| <b>Title and abstract</b>    | 1       | (a) Indicate the study's design with a commonly used term in the title or the abstract <b>Page 2</b><br>(b) Provide in the abstract an informative and balanced summary of what was done and what was found <b>Page 2</b>                                                                                                                                                                                                                                                                                                                                                                                                                                                                                        |
| <b>Introduction</b>          |         |                                                                                                                                                                                                                                                                                                                                                                                                                                                                                                                                                                                                                                                                                                                  |
| Background/rationale         | 2       | Explain the scientific background and rationale for the investigation being reported <b>Page 2-4</b>                                                                                                                                                                                                                                                                                                                                                                                                                                                                                                                                                                                                             |
| Objectives                   | 3       | State specific objectives, including any prespecified hypotheses <b>Page 4</b>                                                                                                                                                                                                                                                                                                                                                                                                                                                                                                                                                                                                                                   |
| <b>Methods</b>               |         |                                                                                                                                                                                                                                                                                                                                                                                                                                                                                                                                                                                                                                                                                                                  |
| Study design                 | 4       | Present key elements of study design early in the paper <b>Page 4</b>                                                                                                                                                                                                                                                                                                                                                                                                                                                                                                                                                                                                                                            |
| Setting                      | 5       | Describe the setting, locations, and relevant dates, including periods of recruitment, exposure, follow-up, and data collection <b>Page 4,5</b>                                                                                                                                                                                                                                                                                                                                                                                                                                                                                                                                                                  |
| Participants                 | 6       | (a) <i>Cohort study</i> —Give the eligibility criteria, and the sources and methods of selection of participants. Describe methods of follow-up <b>Page 4-6</b><br><i>Case-control study</i> —Give the eligibility criteria, and the sources and methods of case ascertainment and control selection. Give the rationale for the choice of cases and controls<br><i>Cross-sectional study</i> —Give the eligibility criteria, and the sources and methods of selection of participants<br>(b) <i>Cohort study</i> —For matched studies, give matching criteria and number of exposed and unexposed<br><i>Case-control study</i> —For matched studies, give matching criteria and the number of controls per case |
| Variables                    | 7       | Clearly define all outcomes, exposures, predictors, potential confounders, and effect modifiers. Give diagnostic criteria, if applicable <b>Page 4,5</b>                                                                                                                                                                                                                                                                                                                                                                                                                                                                                                                                                         |
| Data sources/<br>measurement | 8*      | For each variable of interest, give sources of data and details of methods of assessment (measurement). Describe comparability of assessment methods if there is more than one group <b>Page 4,5</b>                                                                                                                                                                                                                                                                                                                                                                                                                                                                                                             |
| Bias                         | 9       | Describe any efforts to address potential sources of bias <b>Page 4</b>                                                                                                                                                                                                                                                                                                                                                                                                                                                                                                                                                                                                                                          |
| Study size                   | 10      | Explain how the study size was arrived at                                                                                                                                                                                                                                                                                                                                                                                                                                                                                                                                                                                                                                                                        |
| Quantitative variables       | 11      | Explain how quantitative variables were handled in the analyses. If applicable, describe which groupings were chosen and why <b>Page 6</b>                                                                                                                                                                                                                                                                                                                                                                                                                                                                                                                                                                       |
| Statistical methods          | 12      | (a) Describe all statistical methods, including those used to control for confounding <b>Page 6</b><br>(b) Describe any methods used to examine subgroups and interactions <b>Page 6</b><br>(c) Explain how missing data were addressed<br>(d) <i>Cohort study</i> —If applicable, explain how loss to follow-up was addressed<br><i>Case-control study</i> —If applicable, explain how matching of cases and controls was addressed<br><i>Cross-sectional study</i> —If applicable, describe analytical methods taking account of sampling strategy<br>(e) Describe any sensitivity analyses                                                                                                                    |

Continued on next page

**Results**

|                  |     |                                                                                                                                                                                                                                                                                                                                                                                                                                             |
|------------------|-----|---------------------------------------------------------------------------------------------------------------------------------------------------------------------------------------------------------------------------------------------------------------------------------------------------------------------------------------------------------------------------------------------------------------------------------------------|
| Participants     | 13* | (a) Report numbers of individuals at each stage of study—eg numbers potentially eligible, examined for eligibility, confirmed eligible, included in the study, completing follow-up, and analysed <b>Page 6,7</b><br>(b) Give reasons for non-participation at each stage <b>Page 7</b><br>(c) Consider use of a flow diagram                                                                                                               |
| Descriptive data | 14* | (a) Give characteristics of study participants (eg demographic, clinical, social) and information on exposures and potential confounders <b>Page 6-8</b><br>(b) Indicate number of participants with missing data for each variable of interest<br>(c) <i>Cohort study</i> —Summarise follow-up time (eg, average and total amount)                                                                                                         |
| Outcome data     | 15* | <i>Cohort study</i> —Report numbers of outcome events or summary measures over time <b>Page 7-9</b><br><i>Case-control study</i> —Report numbers in each exposure category, or summary measures of exposure<br><i>Cross-sectional study</i> —Report numbers of outcome events or summary measures                                                                                                                                           |
| Main results     | 16  | (a) Give unadjusted estimates and, if applicable, confounder-adjusted estimates and their precision (eg, 95% confidence interval). Make clear which confounders were adjusted for and why they were included <b>Page 7</b><br>(b) Report category boundaries when continuous variables were categorized <b>Page 5-6</b><br>(c) If relevant, consider translating estimates of relative risk into absolute risk for a meaningful time period |
| Other analyses   | 17  | Report other analyses done—eg analyses of subgroups and interactions, and sensitivity analyses                                                                                                                                                                                                                                                                                                                                              |

**Discussion**

|                  |    |                                                                                                                                                                                             |
|------------------|----|---------------------------------------------------------------------------------------------------------------------------------------------------------------------------------------------|
| Key results      | 18 | Summarise key results with reference to study objectives <b>Page 9</b>                                                                                                                      |
| Limitations      | 19 | Discuss limitations of the study, taking into account sources of potential bias or imprecision. Discuss both direction and magnitude of any potential bias <b>Page 11,12</b>                |
| Interpretation   | 20 | Give a cautious overall interpretation of results considering objectives, limitations, multiplicity of analyses, results from similar studies, and other relevant evidence <b>Page 9-12</b> |
| Generalisability | 21 | Discuss the generalisability (external validity) of the study results <b>Page 12</b>                                                                                                        |

**Other information**

|         |    |                                                                                                                                                                              |
|---------|----|------------------------------------------------------------------------------------------------------------------------------------------------------------------------------|
| Funding | 22 | Give the source of funding and the role of the funders for the present study and, if applicable, for the original study on which the present article is based <b>Page 13</b> |
|---------|----|------------------------------------------------------------------------------------------------------------------------------------------------------------------------------|

\*Give information separately for cases and controls in case-control studies and, if applicable, for exposed and unexposed groups in cohort and cross-sectional studies.

**Note:** An Explanation and Elaboration article discusses each checklist item and gives methodological background and published examples of transparent reporting. The STROBE checklist is best used in conjunction with this article (freely available on the Web sites of PLoS Medicine at <http://www.plosmedicine.org/>, Annals of Internal Medicine at <http://www.annals.org/>, and Epidemiology at <http://www.epidem.com/>). Information on the STROBE Initiative is available at [www.strobe-statement.org](http://www.strobe-statement.org).



## Hypogonadism and low bone mineral density in patients on long-term intrathecal opioid delivery therapy

|                                 |                                                                                                                                                                                                                                                                                                                                                                                                                                                                                                                                          |
|---------------------------------|------------------------------------------------------------------------------------------------------------------------------------------------------------------------------------------------------------------------------------------------------------------------------------------------------------------------------------------------------------------------------------------------------------------------------------------------------------------------------------------------------------------------------------------|
| Journal:                        | <i>BMJ Open</i>                                                                                                                                                                                                                                                                                                                                                                                                                                                                                                                          |
| Manuscript ID:                  | bmjopen-2013-002856.R2                                                                                                                                                                                                                                                                                                                                                                                                                                                                                                                   |
| Article Type:                   | Research                                                                                                                                                                                                                                                                                                                                                                                                                                                                                                                                 |
| Date Submitted by the Author:   | 04-May-2013                                                                                                                                                                                                                                                                                                                                                                                                                                                                                                                              |
| Complete List of Authors:       | Duarte, Rui; Birmingham City University, Faculty of Health; Russells Hall Hospital, Department of Pain Management<br>Raphael, Jon; Birmingham City University, Faculty of Health; Russells Hall Hospital, Department of Pain Management<br>Southall, Jane; Russells Hall Hospital, Department of Pain Management<br>Labib, Mourad; Russells Hall Hospital, Department of Clinical Biochemistry<br>Whallett, Andrew; Russells Hall Hospital, Department of Rheumatology<br>Ashford, Robert; Birmingham City University, Faculty of Health |
| <b>Primary Subject Heading</b>: | Anaesthesia                                                                                                                                                                                                                                                                                                                                                                                                                                                                                                                              |
| Secondary Subject Heading:      | Neurology, Pharmacology and therapeutics                                                                                                                                                                                                                                                                                                                                                                                                                                                                                                 |
| Keywords:                       | chronic pain, hypogonadism, drug delivery systems, implantable, bone density                                                                                                                                                                                                                                                                                                                                                                                                                                                             |
|                                 |                                                                                                                                                                                                                                                                                                                                                                                                                                                                                                                                          |

SCHOLARONE™  
Manuscripts



1  
2  
3 **Hypogonadism and low bone mineral density in patients on long-term intrathecal**  
4 **opioid delivery therapy**

5  
6 Rui V. Duarte,<sup>1,2</sup> Jon H. Raphael,<sup>1,2</sup> Jane L. Southall,<sup>2</sup> Mourad H. Labib,<sup>3</sup> Andrew J.  
7 Whallett,<sup>4</sup> Robert L. Ashford<sup>1</sup>

8  
9 <sup>1</sup> Faculty of Health, Birmingham City University, Birmingham, UK

10 <sup>2</sup> Department of Pain Management, Russells Hall Hospital, Dudley, UK

11 <sup>3</sup> Department of Clinical Biochemistry, Russells Hall Hospital, Dudley, UK

12 <sup>4</sup> Department of Rheumatology, Russells Hall Hospital, Dudley, UK  
13  
14  
15  
16  
17

18 Name and address for correspondence: Rui V. Duarte, Faculty of Health, Birmingham City

19 University, City South Campus, Room 220 Ravensbury House, B15 3TN, Birmingham,

20  
21 United Kingdom

22  
23  
24 Tel.: +44 24768 88063; Fax: +44 0121 331 6076; Email: ruivduarte@gmail.com  
25  
26  
27

28 Keywords: bone density; chronic pain; hypogonadism; drug delivery systems, implantable

29  
30 Word count: 2,675  
31  
32  
33  
34  
35  
36  
37  
38  
39  
40  
41  
42  
43  
44  
45  
46  
47  
48  
49  
50  
51  
52  
53  
54  
55  
56  
57  
58  
59  
60

## ARTICLE SUMMARY

### Article focus

- Hypogonadism is common in intrathecal opioid therapy patients but there is limited literature investigating bone mineral density in this population.
- We aimed to prospectively investigate if undiagnosed hypogonadism in intrathecal opioid therapy patients may result in low bone mineral density levels.

### Key messages

- Undiagnosed hypogonadism in intrathecal opioid therapy patients may lead to low bone mineral density levels.
- Hypogonadism and bone mineral density levels surveillance may be paramount to reduce the risk of osteoporosis and fractures in patients undertaking intrathecal opioid therapy.

### Strengths and limitations of this study

- To our knowledge, this is the first study to specifically address the potential decrease in bone mineral density as a consequence of long-term intrathecal opioid therapy.
- Further studies are warranted to assess the effectiveness of early detection and adequate treatment to prevent bone mineral density decrease and to investigate the value of hormonal replacement therapy to normalise bone mineral density levels.

## ABSTRACT

### Objectives

This study aimed to investigate the hypothalamic-pituitary-gonadal axis in a sample of male patients undertaking intrathecal opioid delivery for the management of chronic non-malignant pain and the presence of osteopenia and/or osteoporosis in those diagnosed with hypogonadism.

### Design

Observational study using health data routinely collected for non-research purposes.

### Setting

Department of Pain Management, Russells Hall Hospital, Dudley, United Kingdom.

## Patients

Twenty consecutive male patients attending follow-up clinics for intrathecal opioid therapy had the gonadal axis evaluated by measuring their serum luteinising hormone, follicle stimulating hormone, total testosterone, sex hormone binding globulin and calculation of free testosterone. Bone mineral density was measured by DEXA scanning in those patients diagnosed with hypogonadism.

## Results

Based on calculated free testosterone concentrations, 17 (85%) patients had biochemical hypogonadism with 15 patients (75%) having free testosterone <180 pmol/L and 2 patients (10%) between 180 and 250 pmol/L. Bone mineral density was assessed in 14 of the 17 patients after the exclusion of 3 patients. Osteoporosis (defined as a T-score  $\leq$  -2.5 SD) was detected in three patients (21.4%) and osteopenia (defined as a T-score between -1.0 and -2.5 SD) was observed in seven patients (50%). Five of the 14 patients (35.7%) were at or above the intervention threshold for hip fracture.

## Conclusion

This study suggests an association between hypogonadism and low bone mass density in patients undertaking intrathecal opioid delivery for the management of chronic non-malignant pain. Surveillance of hypogonadism and bone mineral density levels followed by appropriate treatment may be paramount to reduce the risk of osteoporosis development and prevention of fractures in this group of patients.

## INTRODUCTION

Treatment strategies for the management of chronic pain start with the lowest risk and least invasive intervention and progress if a treatment is not effective. Intrathecal drug delivery (IDD) is considered a last resort treatment for the management of severe chronic pain due to its invasive nature, concerns about long-term opioid use, and the possible complications related to this modality of treatment. Intrathecal spinal analgesia has become a recognized treatment for chronic non-malignant pain since the first reservoir was implanted in 1981.[1] The use of opioids via intrathecal drug delivery allows for a selective concentration to reach an important site of pain transmission, the spinal cord dorsal horn.[2] Opioid administration into the intrathecal space achieves its effects at lower doses than using the epidural route.[3] The drug is highly localized, so its analgesic efficacy is maximized at lower doses.[4]

1  
2  
3 Moreover, opioid dose escalation throughout the years may be modest.[5,6] These factors  
4  
5 lead to a decrease in the possible opioid side-effects.  
6  
7

8  
9 The potential effect of intrathecal opioid delivery on the endocrine system is one of the least  
10  
11 recognised and investigated.[7] Currently, opioid-induced hypogonadism is under-  
12  
13 recognised and undertreated.[8,9] Some patients may attribute the signs and symptoms of  
14  
15 hypogonadism; such as decreased libido, tiredness, loss of muscle mass and strength,  
16  
17 among others, to the chronic pain and its related conditions rather than to the intrathecal  
18  
19 medication.[7, 10] Moreover, symptoms of hypogonadism are often neither disclosed by the  
20  
21 patient nor documented by the physician.[11] The current limited clinical awareness of the  
22  
23 opioid effects on the endocrine system, together with the lack of information on their long-  
24  
25 term consequences, is likely to result in a lack of information provision to the patient when  
26  
27 long-term opioid therapy is being considered.[12]  
28  
29

30  
31 Animal studies suggest that opioids affect gonadotropin release via the inhibition of the  
32  
33 gonadotropin releasing hormone (GnRH) by  $\beta$ -endorphin,[13] most likely at  $\mu$ -receptors.[14]  
34  
35 This inhibition reduces the release of luteinizing hormone (LH) and follicle stimulating  
36  
37 hormone (FSH) by the pituitary gland and consequently the production of testosterone by the  
38  
39 gonads, resulting in hypogonadism and loss of libido. This is characterized by low or low-  
40  
41 normal LH and FSH levels, and low testosterone levels.[11] Most circulating testosterone is  
42  
43 bound to sex hormone-binding globulin (SHBG). A lesser fraction is non-specifically bound to  
44  
45 albumin and only a small percentage of testosterone is unbound.[15] Historically, free  
46  
47 testosterone was thought to be the only biologically-active component. However,  
48  
49 testosterone is weakly bound to serum albumin and dissociates freely in the capillary bed,  
50  
51 and is readily available for tissue uptake. All non-SHBG-bound testosterone is therefore  
52  
53 considered bioavailable.  
54  
55  
56  
57  
58  
59  
60

1  
2  
3 Hypogonadism is an important risk factor for development of osteoporosis in both sexes, but  
4  
5 opioids have not been considered as a risk factor.[16] To our knowledge, the assessment of  
6  
7 BMD in patients undertaking intrathecal drug delivery is limited to one study which  
8  
9 suggested a tendency towards decreased BMD in these patients but the prevalence of  
10  
11 osteopenia or osteoporosis in these patients was not reported in this study.[17]  
12  
13

14  
15 The aim of this study was to investigate the hypothalamic-pituitary-gonadal axis in a sample  
16  
17 of male patients undertaking intrathecal opioid delivery for the management of chronic non-  
18  
19 malignant pain and to assess the prevalence of osteopenia and/or osteoporosis in those  
20  
21 diagnosed with hypogonadism.  
22  
23

## 24 25 **METHODS**

### 26 27 **Patients**

28  
29 Twenty consecutive male patients attending follow-up clinics for IDD therapy at Russells Hall  
30  
31 Hospital, Dudley, UK, for the management of chronic non-cancer pain were included in this  
32  
33 observational study using health data routinely collected for non-research purposes. All  
34  
35 assessments were performed as part of routine clinical care. No additional procedures were  
36  
37 carried out for research purposes. None of these patients received testosterone  
38  
39 supplementation within the previous three months. The pain syndrome experienced by the  
40  
41 patients was classified as nociceptive (58.8%), neuropathic (5.8%) and mixed nociceptive-  
42  
43 neuropathic (35.3%). All the patients were receiving intrathecal opioids for the management  
44  
45 of their pain. Intrathecal morphine was the only medication administered to 50% of the  
46  
47 sample. In individual cases, other substances were added to the intrathecal medication, with  
48  
49 combinations of morphine with bupivacaine (12.5%), morphine with bupivacaine and  
50  
51 clonidine (25%), and morphine with bupivacaine and baclofen (12.5%).  
52  
53  
54

### 55 56 **Laboratory Methods**

1  
2  
3 Blood samples were collected between 8am and 11am during a seven-month period (April to  
4  
5 October 2010), as part of routine clinical care, for the measurement of serum LH, FSH,  
6  
7 prolactin (PRL), total testosterone (TT) and SHBG. All assays were carried out by the  
8  
9 Department of Clinical Biochemistry at Russells Hall Hospital, Dudley, UK. LH, FSH, PRL  
10  
11 and TT were measured according to the manufacturer's instructions by immuno-  
12  
13 enzymometric fluorimetric assay on the Tosoh AIA 2000 LA analyser (Tosoh Bioscience  
14  
15 N.V., Tessenderlo, Belgium). The inter-assay imprecision (%CV) quoted by the manufacturer  
16  
17 was 2.6% for LH, 2.3% for FSH and 5.3% for testosterone. SHBG was measured according  
18  
19 to the manufacturer's instructions by chemiluminescent immunometric assay on the Immulite  
20  
21 2000 XPi analyser (Siemens Healthcare Diagnostics Ltd, Camberley, Surrey, UK). The inter-  
22  
23 assay variability (%CV) for SHBG was 5%. Calculations of free testosterone (FT) were  
24  
25 carried out using the Vermeulen equation.[15] Serum TT < 8 nmol/L and/or FT < 180 pmol/L  
26  
27 was considered as biochemical hypogonadism. Serum TT 8 – 12 nmol/L and/or FT 180-250  
28  
29 pmol/L was considered as borderline/low.[18]  
30  
31  
32

### 33 **Assessment of Bone Mineral Density**

34  
35 Bone mineral density was measured by DEXA scanning of the femur (neck and hip) and  
36  
37 lumbar spine or left forearm using the Lunar Prodigy DEXA (GE Lunar Corp., Madison, WI,  
38  
39 USA). Bone densitometry DEXA scans were carried out by the Department of Radiology, at  
40  
41 Corbett Hospital, Dudley, UK. Lumbar spine scan was not carried out in patients who had  
42  
43 previous spinal surgery. In those cases, assessment was performed at the left forearm site.  
44  
45 Results are presented as BMD ( $\text{g}/\text{cm}^2$ ), T-scores and Z-scores. Reference values for T-  
46  
47 score were based on UK (ages 20-40) femur, spine or forearm reference population (v107).  
48  
49 Osteopenia was defined as a T-score between -1.0 and -2.5 SD, and osteoporosis as a T-  
50  
51 score at or below -2.5 SD. Measurements of height, weight and body mass index (BMI) were  
52  
53 also performed. The BMI scores were categorised according to the World Health  
54  
55 Organisation key cut-off points as <18.5 (underweight),  $\geq 18.5$  and  $\leq 24.9$  (normal weight),  $\geq$   
56  
57  
58  
59  
60

25 and  $\leq 29.9$  (overweight), and  $\geq 30$  kg/m<sup>2</sup> (obese). The 10-year probability of fracture was calculated based on the Fracture Risk Assessment Tool (FRAX).[19] In addition to the BMD value or T-score (femoral neck), this tool takes into account clinical risk factors for the development of osteoporotic or hip fractures such as previous fractures, history of hip fracture in the patient's parents and hypogonadism, among other factors.

### Data analysis

Kolmogorov-Smirnov test was performed to test distribution of numerical data, followed by the appropriate statistical tests. Comparisons between groups were carried out with the Mann-Whitney test. Data is reported as median (minimum-maximum). The 95% confidence intervals for the TT and FT median values were calculated for comparison with normal reference values. Statistical significance was judged at 5% level. Statistical tests were performed using Predictive Analytics SoftWare (PASW) (version 18.0, SPSS Inc., Chicago, IL, USA).

## RESULTS

### Assessment of Sex Hormones

The median age at the time of blood collection was 58 years (47-69). The median duration from implantation of the IDD system to hormone assay was 100 months (15-203) with an intrathecal opioid dose of 2.68 mg/day (range 1-9.7) (Table 1). The duration of pain prior to commencement of IDD was 9 years (range 3-35).

**Table 1.** Reference ranges and levels in 20 men undertaking intrathecal opioid administration

|                      | Reference range | Intrathecal opioid patients |
|----------------------|-----------------|-----------------------------|
| <b>LH (IU/L)</b>     | 2.2 - 13.3      | 1.9 (0.2-19.9)              |
| <b>FSH (IU/L)</b>    | 1 - 7           | 5.3 (0.3-23.9)              |
| <b>SHBG (nmol/L)</b> | 13 - 71         | 51 (17-123)                 |
| <b>PRL (mU/L)</b>    | 0 - 445         | 225 (53-614)                |
| <b>TT (nmol/L)</b>   | 9.47 - 28.3     | 4.95 (1.2-18.8)             |

1  
2  
3 FT (pmol/L) 185 - 437 69.45 (14-328)

4 **Key:** LH - luteinizing hormone; FSH - follicle stimulating hormone; SHBG  
5 - sex hormone binding globulin; PRL - prolactin; TT - total testosterone;  
6 FT - free testosterone  
7

8 Statistics are presented as median (minimum-maximum)  
9

10  
11 The median TT levels with 95% confidence intervals was 4.95 nmol/L (3.0-10.1), which were  
12 significantly lower than the cut-off level of 12 nmol/L for borderline/low testosterone. The  
13 median FT levels with 95% confidence intervals [69.45 (47.3-127.0)] were also significantly  
14 lower than the cut-off level of 180 pmol/L for low FT ( $t = -3.403$ ,  $p < 0.005$ ,  $r = 0.61$ ). The  
15 mean LH, FSH and SHBG concentrations were within the respective reference ranges.  
16  
17 Prolactin levels were above the reference range in two patients. One of these patients had  
18 low TT and FT and the other patient presented borderline/low TT. Based on TT, 17 (85%) of  
19 the patients presented biochemical hypogonadism values with 12 (60%) at less than 8  
20 nmol/L and 5 (25%) with TT values between 8 and 12 nmol/L (borderline/low). Based on FT  
21 calculations, 17 (85%) patients were biochemically hypogonadal with 15 (75%) at less than  
22 180 pmol/L and two (10%) patients between 180 and 250 pmol/L. Only one of the patients  
23 had TT and FT values within quoted reference ranges, two patients presented borderline/low  
24 TT and normal FT, one patient had low FT values and normal TT, and one borderline/low FT  
25 and normal TT.  
26  
27  
28  
29  
30  
31  
32  
33  
34  
35  
36  
37  
38  
39  
40  
41  
42  
43  
44  
45  
46  
47  
48  
49  
50  
51  
52  
53  
54  
55  
56  
57  
58  
59  
60



### Assessment of Bone Mineral Density

Considering that free testosterone reflects more accurately the clinical situation than total testosterone in plasma, [15] the 17 male patients diagnosed as hypogonadal through calculated FT were considered for assessment of bone mineral density. Three patients were excluded (one patient was excluded on the basis that the primary indication for IDD use was spinal osteoporosis, one patient had the intrathecal opioid therapy discontinued and one patient passed away).

The median age of the 14 patients at the time of BMD assessment was 62.5 years (48-70). All the patients investigated for BMD were Caucasian. The BMI score was 29.4 kg/m<sup>2</sup> (20.1-45.4). According to the BMI score, the majority of the patients (64.3%) were either overweight or obese and none of the patients were underweight.

Table 2 shows the results of the BMD assessment. Individual T-scores below -1.0 SD in at least one site were identified in 10 (71.4%) of the patients. Osteopenia defined as a T-score between -1.0 and -2.5 SD was observed in seven (50%) of the patients. Osteoporosis defined as a T-score at or below -2.5 SD was detected in three (21.4%) of the subjects. When considering the Z-scores, one (7.1%) of the participants presented a value at or below -2.5 SD indicating osteoporosis and four (28.6%) other patients Z-scores between -1.0 and -2.5 SD representative of osteopenia.

**Table 2.** Bone Mineral Density measurements

| Site of measurement   | BMD (g/cm <sup>2</sup> ) | T-score            | Z-score            |
|-----------------------|--------------------------|--------------------|--------------------|
| Femoral neck (n = 14) | 0.925 (0.734 - 1.176)    | -1.10 (-2.6 - 0.8) | -0.10 (-1.9 - 2.0) |
| Total hip (n = 14)    | 0.947 (0.686 - 1.222)    | -1.10 (-3.1 - 1.0) | -0.40 (-2.6 - 1.9) |
| Forearm (n = 10)      | 0.736 (0.665 - 0.845)    | -0.40 (-3.2 - 1.2) | 0.30 (-2.4 - 1.7)  |
| Lumbar (n = 4)        | 1.185 (0.876 - 1.487)    | -0.40 (-2.4 - 2.0) | 0.00 (-1.9 - 2.3)  |

**Key:** BMD - Bone Mineral Density

Statistics are presented as median (minimum-maximum)

Seven of the subjects had T-scores below -1.0 SD in more than one assessed site (Table 3). Three patients had either osteoporosis and/or osteopenia in two sites and four patients in three sites. Three of the patients presented Z-scores lower than -1.0 SD in three sites and one patient in two sites. No statistical differences were observed between the patients within normal reference range values and those with osteopenia or osteoporosis for age ( $p = 0.72$ ) or BMI ( $p = 0.48$ ).

**Table 3.** Bone Mineral Density outcomes

| Site of measurement   | Normal       | Osteopenia <sup>a</sup> | Osteoporosis <sup>b</sup> |
|-----------------------|--------------|-------------------------|---------------------------|
| Femoral neck (n = 14) | 7 / 14 (50%) | 5 / 14 (35.7%)          | 2 / 14 (14.3%)            |
| Total hip (n = 14)    | 7 / 14 (50%) | 4 / 14 (28.6%)          | 3 / 14 (21.4%)            |
| Forearm (n = 10)      | 7 / 10 (70%) | 2 / 10 (20%)            | 1 / 10 (10%)              |
| Lumbar (n = 4)        | 2 / 4 (50%)  | 2 / 4 (50%)             |                           |

<sup>a</sup> Osteopenia was defined as  $-2.5 \text{ SD} < \text{T-score} < -1.0 \text{ SD}$

<sup>b</sup> Osteoporosis was defined as  $\text{T-score} \leq -2.5 \text{ SD}$

Values represent the number of patients/total patients (%)

Several known clinical risk factors for low bone mineral density were present in this sample including hypogonadism in all of the patients. Investigation of osteoporosis related fractures through x-rays were not performed. Although the patients in the studied group did not report any incident fractures, assessment of the ten-year probability of major osteoporotic or hip fracture based on the FRAX tool indicated a median probability of 5.7% (2.3-17) for major osteoporotic fracture and 1.1% (0.1-11) for hip fracture. Five (35.7%) of the patients were at or above the intervention threshold for hip fracture.

## DISCUSSION

Our study showed that 85% of male patients on intrathecal opioid therapy were biochemically hypogonadal. The serum gonadotropin (LH and FSH) levels in these patients were inappropriately low or low-normal despite low serum testosterone concentrations, suggesting that testosterone suppression was caused through an inhibition of pituitary FSH and LH secretion (secondary hypogonadism). Raised serum prolactin may have contributed

1  
2  
3 to the low testosterone in two patients. Although acute administration of morphine leads to  
4 an increase in PRL levels,[12] tolerance usually develops during chronic administration.[20]  
5  
6 Previous studies investigating chronic administration of intrathecal morphine have also  
7  
8 reported a small proportion of patients with elevated PRL levels.[17,21] In a group of cancer  
9  
10 survivors on opioids, 90% exhibited hypogonadism and low testosterone levels; LH levels  
11  
12 but not FSH levels were found to be significantly lower when compared with cancer survivors  
13  
14 not on opioid therapy.[22] The important role of endogenous opioids in the control of LH  
15  
16 secretion has been demonstrated [23] and suppression of the hypothalamic-pituitary-  
17  
18 gonadal axis by intrathecal opioids may be caused by a similar mechanism to that of  
19  
20 endogenous opioids.[24] Nevertheless, the suppression of LH levels may be less  
21  
22 accentuated when the opioids are administered orally or transdermally rather than  
23  
24 intrathecally.[12]  
25  
26

27  
28  
29 Hypogonadism is an important risk factor for the development of osteoporosis in both  
30  
31 sexes.[16] To our knowledge, the incidence of osteopaenia or osteoporosis in patients  
32  
33 undertaking intrathecal opioid therapy has not been previously reported. In our study, 50% of  
34  
35 patients had osteopenia and 21.4% had osteoporosis. Interestingly, an association between  
36  
37 oral opioid administration and reduced BMD was demonstrated in one study but the  
38  
39 presence or absence of hypogonadism was not assessed.[25] In a cross-sectional study,  
40  
41 osteopenia was present in 50% of the male patients undertaking oral opioids [26] but again it  
42  
43 was not clear if those patients were hypogonadal.  
44  
45

46  
47 An association between oral opioid medication and an increase in fracture risk has also been  
48  
49 reported [27] but assessment of bone mineral density was not performed. The authors  
50  
51 suggested that this increase in fracture risk was possibly related to the risk of falls due to the  
52  
53 central nervous system side effect of dizziness caused by oral opioids. Opioid-induced  
54  
55 dizziness is less likely to occur in IDD patients since only a fraction of the opioid delivered  
56  
57

1  
2  
3 via intrathecal route reaches the brain. Low bone mass is an important component of the risk  
4 of fracture as well as non-skeletal factors such as propensity to fall.[16,28] Many fragility  
5 fractures occur in the absence of osteoporosis, although in the presence of this disease, the  
6 risk of fracture is higher.[29] Osteoporotic fractures are a significant cause of morbidity and  
7 mortality especially in the developed countries,[30] and are associated with increased  
8 mortality, particularly in men.[31]

9  
10  
11  
12  
13  
14  
15  
16  
17 The assumption that hypogonadism is a risk factor for decreased BMD has not always been  
18 confirmed in the literature. No association between age-related hypogonadism (based on  
19 total testosterone) and decreased BMD was found in elderly men.[32] In contrast, free  
20 testosterone (calculated according to the Vermeulen equation) was demonstrated to be an  
21 independent predictor of BMD and fractures in elderly men [33] and a positive predictor of  
22 cortical bone size in young men at the age of peak bone mass.[34] These contradictory  
23 findings may have occurred because free testosterone is more important physiologically than  
24 total testosterone. SHBG levels, which generally are genetically determined, seem to play an  
25 important role in bone mass, hence the reason for free testosterone to be a stronger  
26 predictor than total testosterone alone. Recently it has been suggested that SHBG levels in  
27 healthy adult men at the age of peak bone mass were positively associated with cortical  
28 bone size independently of sex-steroid levels.[35] However, in middle aged and elderly men,  
29 SHBG elevation was significantly associated with the occurrence of osteoporotic  
30 fractures.[36] Although not yet confirmed, it has been suggested that the effect of SHBG on  
31 BMD may change with age and/or testosterone sufficiency or deficiency.[37]

32  
33  
34  
35  
36  
37  
38  
39  
40  
41  
42  
43  
44  
45  
46  
47  
48  
49 It is important to note the limitations of this study. A small number of patients were included  
50 without a control group. The gonadal status and bone mineral density were not evaluated  
51 prior to commencement of IDD therapy. Information on systemic opioids was not collected. A  
52 proportion of these patients are provided with oral opioid medication on an individual basis  
53  
54  
55  
56  
57  
58  
59  
60

1  
2  
3 for occasional flare-ups. The strongest systemic opioid provided is tramadol at a dose  $\leq$  400  
4 mg/day. Several possible factors may affect the sexual function in this group of patients.  
5  
6  
7 Chronic pain did not seem to be the cause of gonadal function reduction in patients  
8  
9 undertaking intrathecal morphine therapy when compared with a control group of chronic  
10  
11 pain patients who were not taking any form of opioid drugs.[24] Of the possible chronic  
12  
13 illnesses identified in a longitudinal study with 890 male participants, only cancer (9%) was  
14  
15 associated with a greater decrease in testosterone levels than the decrease that occurred  
16  
17 with ageing alone.[38] Women were not included in this study. Low libido and amenorrhea  
18  
19 have been reported in female IDDS patients,[17,24] although the prevalence has been  
20  
21 reported to be lower in women.[26] A large meta-analysis, which included approximately  
22  
23 39,000 men and women has concluded that the age-specific risk of hip fracture is similar in  
24  
25 both men and women with the same BMD and age.[39] Despite these limitations, the results  
26  
27 of BMD assessment suggest that the IDDS population may have an increased risk for  
28  
29 osteoporotic fractures.  
30  
31

32  
33 It is important to provide appropriate treatment to patients with low BMD. FRAX analysis is a  
34  
35 simple tool that can be used to identify of patients in whom osteoporosis prophylaxis is  
36  
37 appropriate by taking into account multiple risk factors including BMD levels and  
38  
39 hypogonadism. BMD can be normalized and maintained within the normal range in men with  
40  
41 either primary or secondary hypogonadism by continuous, long-term hormonal replacement  
42  
43 therapy [40] though the full effect on BMD may take up to 24 months.[41] Opioid induced  
44  
45 hypogonadism may be reversible. Clinically significant improvements in hypogonadal  
46  
47 symptoms were observed in men with opioid induced androgen deficiency following  
48  
49 treatment with transdermal testosterone patches. [42] In patients undertaking intrathecal  
50  
51 opioid delivery, recovery of serum testosterone levels following cessation of therapy or  
52  
53 significant improvements in libido following hormonal replacement therapy have also been  
54  
55 reported.[17,24]  
56  
57  
58  
59  
60

1  
2  
3  
4  
5 Further studies in this patient group are warranted. Future studies should prospectively  
6  
7 evaluate the gonadal axis, reported sexual health of the participants and BMD. It would also  
8  
9 be important to compare these results with matched cohorts of chronic pain patients.

10  
11 Potential comparisons include patients on systemic opioids only, on a different course of  
12  
13 intrathecal therapy (e.g. ziconotide) or patients using spinal cord stimulation for the  
14  
15 management of their chronic pain.

16  
17  
18  
19 This study suggests an important association between hypogonadism and low bone mass  
20  
21 density in patients undertaking intrathecal opioid delivery for the management of chronic  
22  
23 non-malignant pain. However, since the gonadal status and BMD were not determined prior  
24  
25 to initiation of intrathecal opioid delivery, we cannot conclude that the decreased BMD was  
26  
27 caused by hypogonadism or opioid administration. Early detection of hypogonadism followed  
28  
29 by appropriate treatment may be paramount to reduce the risk of osteoporosis development  
30  
31 and prevention of fractures in this population. Furthermore, surveillance of BMD levels in  
32  
33 hypogonadal intrathecal opioid delivery patients should be considered.  
34  
35  
36  
37  
38  
39  
40  
41  
42  
43  
44  
45  
46  
47  
48  
49  
50  
51  
52  
53  
54  
55  
56  
57  
58  
59  
60

**Acknowledgments**

The authors are grateful to Dr Jane Dale from the Department of Endocrinology and Diabetes at Russells Hall Hospital for her comments on the final version of this manuscript.

**Funding statement**

This research received no specific grant from any funding agency in the public, commercial or not-for-profit sectors.

**Competing interests statement**

The authors report no conflicts of interest.

**Contributorship statement**

RVD, JHR, JLS, MHL, AJW and RLA have made substantial contributions to (1) the conception and design of the study, or acquisition of data, or analysis and interpretation of data; (2) drafting the article or revising it critically for important intellectual content; and (3) final approval of the version to be submitted.

**Ethics approval**

All assessments were performed as part of routine clinical care. No additional procedures were carried out for research purposes.

**Data sharing**

No additional data available

**REFERENCES**

- 1 Onofrio BM, Yaksh TL, Arnold PG. Continuous low-dose intrathecal morphine administration in the treatment of chronic pain of malignant origin. *Mayo Clin Proc* 1981;56:516-20.
- 2 Grady K, Raphael J. Spinal administration. In: Rice A. ed. *Textbook of Clinical Pain Management: Chronic Volume*. London: Hodder Arnold 2008:284-91.
- 3 Nordberg G, Hedner T, Mellstrand T, et al. Pharmacokinetic aspects of intrathecal morphine analgesia. *Anesthesiology* 1984;60:448-54.
- 4 Bernards C. Cerebrospinal fluid and spinal cord distribution of baclofen and bupivacaine during slow intrathecal infusion in pigs. *Anesthesiology* 2006;105:169-178.
- 5 Duarte RV, Raphael JH, Sparkes E, et al. Long-term intrathecal drug administration for chronic nonmalignant pain. *J Neurosurg Anesthesiol* 2012;24:63-70.
- 6 Duarte RV, Raphael JH, Haque MS, et al. A predictive model for intrathecal opioid dose escalation for chronic non-cancer pain. *Pain Physician* 2012;15:363-69.
- 7 Doleys D, Dinoff B, Page L, et al. Sexual dysfunction and other side effects of intraspinal opiate use in the management of chronic non-cancer pain. *American Journal of Pain Management* 1998;8:5-11.
- 8 Reddy RG, Aung T, Karavitaki N, et al. Opioid induced hypogonadism. *BMJ* 2010;341:c4462.
- 9 Duarte RV, Raphael JH, Mourad Labib, et al. Prevalence and influence of diagnostic criteria in the assessment of hypogonadism in intrathecal opioid therapy patients. *Pain Physician* 2013;16:9-14.
- 10 Katz N, Mazer NA. The impact of opioids on the endocrine system. *Clin J Pain* 2009;25:170-5.
- 11 Petak SM, Nankin HR, Spark RF, et al. American Association of Clinical Endocrinologists Medical Guidelines for clinical practice for the evaluation and treatment of hypogonadism in adult male patients - 2002 update. *Endocr Pract* 2002;8:440-56.



- 1  
2  
3 12 Vuong C, Van Uum SHM, O'Dell LE, et al. The effects of opioids and opioid analogs on  
4 animal and human endocrine systems. *Endocr Rev* 2010;31:98-132.  
5  
6  
7 13 Schulz R, Wilhelm A, Pirke KM, et al. Beta-endorphin and dynorphin control serum  
8 luteinizing hormone level in immature female rats. *Nature* 1981;294:757-9.  
9  
10  
11 14 Pfeiffer DG, Pfeiffer A, Shimohigashi Y, et al. Predominant involvement of mu-rather than  
12 delta- or kappa-opiate receptors in LH secretion. *Peptides* 1983;4:647-9.  
13  
14  
15 15 Vermeulen A, Verdonck L, Kaufman JM. A critical evaluation of simple methods for the  
16 estimation of free testosterone in serum. *J Clin Endocrinol Metab* 1999;84:3666-72.  
17  
18  
19 16 Kanis JA. Diagnosis of osteoporosis and assessment of fracture risk. *Lancet*  
20 2002;359:1929-36.  
21  
22  
23 17 Abs R, Verhelst J, Maeyaert J, et al. Endocrine consequences of long-term intrathecal  
24 administration of opioids. *J Clin Endocrinol Metab* 2000;85:2215-22.  
25  
26  
27 18 Hackett G, Cole NS, Deshpande AA, et al. Biochemical hypogonadism in men with type 2  
28 diabetes in primary care practice. *Br J Diabetes Vasc Dis* 2009;9:226-31.  
29  
30  
31 19 Kanis JA, Johnell O, Oden A, et al. FRAX and the assessment of fracture probability in  
32 men and women from the UK. *Osteoporos Int* 2008;19:385-97.  
33  
34  
35 20 Morley JE. The endocrinology of the opiates and opioid peptides. *Metabolism*  
36 1981;30:195-209.  
37  
38  
39 21 Paice JA, Penn RD, Ryan WG. Altered sexual function and decreased testosterone in  
40 patients receiving intraspinal opioids. *J Pain Symptom Manage* 1994;9:126-31.  
41  
42  
43 22 Rajagopal A, Vassilopoulou-Sellin R, Palmer JL, et al. Symptomatic hypogonadism in  
44 male survivors of cancer with chronic exposure to opioids. *Cancer* 2004;100:851-8.  
45  
46  
47 23 Genazzani AR, Genazzani AD, Volpogni C, et al. Opioid control of gonadotrophin  
48 secretion in humans. *Hum Reprod* 1993;8(Suppl 2):151-3.  
49  
50  
51 24 Finch P, Roberts L, Price L, et al. Hypogonadism in patients treated with intrathecal  
52 morphine. *Clin J Pain* 2000;16:251-4.  
53  
54  
55  
56  
57  
58  
59  
60

- 1  
2  
3 25 Kinjo M, Setoguchi S, Schneeweiss S, et al. Bone mineral density in subjects using  
4  
5 central nervous system-active medications. *Am J Med* 2005;118:1414.  
6  
7 26 Fraser LA, Morrison D, Morley-Forster P, et al. Oral opioids for chronic non-cancer pain:  
8  
9 higher prevalence of hypogonadism in men than in women. *Exp Clin Endocrinol Diabetes*  
10  
11 2009;117:38-43.  
12  
13 27 Vestergaard P, Rejnmark L, Mosekilde L. Fracture risk associated with the use of  
14  
15 morphine and opiates. *J Inter Med* 2006;260:76-87.  
16  
17 28 Center JR, Nguyen TV, Sambrook PN, et al. Hormonal and biochemical parameters and  
18  
19 osteoporotic fractures in elderly men. *J Bone Miner Res* 2000;15:05-1411.  
20  
21 29 Kanis JA, Melton LJ, Christiansen C, et al. The diagnosis of osteoporosis. *J Bone Miner*  
22  
23 *Res* 1994;9:1137-41.  
24  
25 30 Johnell O, Kanis JA. An estimate of the worldwide prevalence and disability associated  
26  
27 with osteoporotic fractures. *Osteoporos Int* 2006;17:1726-33.  
28  
29 31 Center JR, Nguyen TV, Schneider D, et al. Mortality after all major types of osteoporotic  
30  
31 fracture in men and women: an observational study. *Lancet* 1999;353:878-82.  
32  
33 32 Amin S, Zhang Y, Sawin CT, et al. Association of hypogonadism and estradiol levels with  
34  
35 bone mineral density in elderly men from the Framingham study. *Ann Intern Med*  
36  
37 2000;133:951-63.  
38  
39 33 Mellström D, Johnell O, Ljunggren O, et al. Free testosterone is an independent predictor  
40  
41 of BMD and prevalent fractures in elderly men: MrOS Sweden. *J Bone Miner Res*  
42  
43 2006;21:529-35.  
44  
45 34 Lorentzon M, Swanson C, Andersson N, et al. Free testosterone is a positive, whereas  
46  
47 free estradiol is a negative, predictor of cortical bone size in young Swedish men: the  
48  
49 GOOD study. *J Bone Miner Res* 2005;20:1334-41.  
50  
51 35 Vanbillemont G, Lapauw B, Bogaert V, et al. Sex hormone-binding globulin as an  
52  
53 independent determinant of cortical bone status in men at the age of peak bone mass. *J*  
54  
55 *Clin Endocrinol Metab* 2010;95:1579-86.  
56  
57  
58  
59  
60

- 1  
2  
3 36 Hoppé E, Bouvard B, Royer M, et al. Sex hormone-binding globulin in osteoporosis. *Joint*  
4  
5 Bone Spine 2010;77:306-312.  
6  
7 37 Khosla S. Sex hormone binding globulin: inhibitor or facilitator (or both) of sex steroid  
8  
9 action? *J Clin Endocrinol Metab* 2006;91:4764-6.  
10  
11 38 Harman S, Metter E, Tobin J, et al. Longitudinal effects of aging on serum total and free  
12  
13 testosterone levels in healthy men. *J Clin Endocrinol Metab* 2001;86:724-31.  
14  
15 39 Johnell O, Kanis JA, Oden A, et al. Predictive value of BMD for hip and other fractures. *J*  
16  
17 Bone Miner Res 2005;20:1185-94.  
18  
19 40 Katznelson L, Finkelstein JS, Schoenfeld DA, et al. Increase in bone density and lean  
20  
21 body mass during testosterone administration in men with acquired hypogonadism. *J Clin*  
22  
23 Endocrinol Metab 1996;81:4358-65.  
24  
25 41 Snyder PJ, Peachey H, Berlin JA, et al. Effects of testosterone replacement in  
26  
27 hypogonadal men. *J Clin Endocrinol Metab* 2000;85:2670-77.  
28  
29 42 Daniell HW, Lentz R, Mazer NA. Open-label pilot study of testosterone patch therapy in  
30  
31 men with opioid-induced androgen deficiency. *J Pain* 2006;7:200-10.  
32  
33  
34  
35  
36  
37  
38  
39  
40  
41  
42  
43  
44  
45  
46  
47  
48  
49  
50  
51  
52  
53  
54  
55  
56  
57  
58  
59  
60

1  
2  
3 **Hypogonadism and low bone mineral density in patients on long-term intrathecal**  
4 **opioid delivery therapy**

5  
6 Rui V. Duarte,<sup>1,2</sup> Jon H. Raphael,<sup>1,2</sup> Jane L. Southall,<sup>2</sup> Mourad H. Labib,<sup>3</sup> Andrew J.  
7 Whallett,<sup>4</sup> Robert L. Ashford<sup>1</sup>

8  
9 <sup>1</sup> Faculty of Health, Birmingham City University, Birmingham, UK

10 <sup>2</sup> Department of Pain Management, Russells Hall Hospital, Dudley, UK

11 <sup>3</sup> Department of Clinical Biochemistry, Russells Hall Hospital, Dudley, UK

12 <sup>4</sup> Department of Rheumatology, Russells Hall Hospital, Dudley, UK  
13  
14  
15  
16  
17

18 Name and address for correspondence: Rui V. Duarte, Faculty of Health, Birmingham City  
19 University, City South Campus, Room 220 Ravensbury House, B15 3TN, Birmingham,  
20 United Kingdom  
21  
22

23  
24 Tel.: +44 24768 88063; Fax: +44 0121 331 6076; Email: ruivduarte@gmail.com  
25  
26  
27

28 Keywords: bone density; chronic pain; hypogonadism; drug delivery systems, implantable  
29

30 Word count: 2,675  
31  
32  
33  
34  
35  
36  
37  
38  
39  
40  
41  
42  
43  
44  
45  
46  
47  
48  
49  
50  
51  
52  
53  
54  
55  
56  
57  
58  
59  
60

## ABSTRACT

### Objectives

This study aimed to investigate the hypothalamic-pituitary-gonadal axis in a sample of male patients undertaking intrathecal opioid delivery for the management of chronic non-malignant pain and the presence of osteopenia and/or osteoporosis in those diagnosed with hypogonadism.

### Design

Observational study using health data routinely collected for non-research purposes.

### Setting

Department of Pain Management, Russells Hall Hospital, Dudley, United Kingdom.

### Patients

Twenty consecutive male patients attending follow-up clinics for intrathecal opioid therapy had the gonadal axis evaluated by measuring their serum luteinising hormone, follicle stimulating hormone, total testosterone, sex hormone binding globulin and calculation of free testosterone. Bone mineral density was measured by DEXA scanning in those patients diagnosed with hypogonadism.

### Results

Based on calculated free testosterone concentrations, 17 (85%) patients had biochemical hypogonadism with 15 patients (75%) having free testosterone <180 pmol/L and 2 patients (10%) between 180 and 250 pmol/L. Bone mineral density was assessed in 14 of the 17 patients after the exclusion of 3 patients. Osteoporosis (defined as a T-score  $\leq$  -2.5 SD) was detected in three patients (21.4%) and osteopenia (defined as a T-score between -1.0 and -2.5 SD) was observed in seven patients (50%). Five of the 14 patients (35.7%) were at or above the intervention threshold for hip fracture.

### Conclusion

This study suggests an association between hypogonadism and low bone mass density in patients undertaking intrathecal opioid delivery for the management of chronic non-malignant pain. Surveillance of hypogonadism and bone mineral density levels followed by appropriate treatment may be paramount to reduce the risk of osteoporosis development and prevention of fractures in this group of patients.

## INTRODUCTION

Treatment strategies for the management of chronic pain start with the lowest risk and least invasive intervention and progress if a treatment is not effective. Intrathecal drug delivery

1  
2  
3 (IDD) is considered a last resort treatment for the management of severe chronic pain due to  
4 its invasive nature, concerns about long-term opioid use, and the possible complications  
5 related to this modality of treatment. Intrathecal spinal analgesia has become a recognized  
6 treatment for chronic non-malignant pain since the first reservoir was implanted in 1981.[1]  
7  
8 The use of opioids via intrathecal drug delivery allows for a selective concentration to reach  
9 an important site of pain transmission, the spinal cord dorsal horn.[2] Opioid administration  
10 into the intrathecal space achieves its effects at lower doses than using the epidural route.[3]  
11  
12 The drug is highly localized, so its analgesic efficacy is maximized at lower doses.[4]  
13  
14 Moreover, opioid dose escalation throughout the years may be modest.[5,6] These factors  
15 lead to a decrease in the possible opioid side-effects.  
16  
17  
18  
19  
20  
21  
22  
23  
24

25 The potential effect of intrathecal opioid delivery on the endocrine system is one of the least  
26 recognised and investigated.[7] Currently, opioid-induced hypogonadism is under-  
27 recognised and undertreated.[8,9] Some patients may attribute the signs and symptoms of  
28 hypogonadism; such as decreased libido, tiredness, loss of muscle mass and strength,  
29 among others, to the chronic pain and its related conditions rather than to the intrathecal  
30 medication.[7, 10] Moreover, symptoms of hypogonadism are often neither disclosed by the  
31 patient nor documented by the physician.[11] The current limited clinical awareness of the  
32 opioid effects on the endocrine system, together with the lack of information on their long-  
33 term consequences, is likely to result in a lack of information provision to the patient when  
34 long-term opioid therapy is being considered.[12]  
35  
36  
37  
38  
39  
40  
41  
42  
43  
44  
45  
46  
47

48 Animal studies suggest that opioids affect gonadotropin release via the inhibition of the  
49 gonadotropin releasing hormone (GnRH) by  $\beta$ -endorphin,[13] most likely at  $\mu$ -receptors.[14]  
50 This inhibition reduces the release of luteinizing hormone (LH) and follicle stimulating  
51 hormone (FSH) by the pituitary gland and consequently the production of testosterone by the  
52 gonads, resulting in hypogonadism and loss of libido. This is characterized by low or low-  
53  
54  
55  
56  
57  
58  
59  
60

1  
2  
3 normal LH and FSH levels, and low testosterone levels.[11] Most circulating testosterone is  
4 bound to sex hormone-binding globulin (SHBG). A lesser fraction is non-specifically bound to  
5 albumin and only a small percentage of testosterone is unbound.[15] Historically, free  
6 testosterone was thought to be the only biologically-active component. However,  
7 testosterone is weakly bound to serum albumin and dissociates freely in the capillary bed,  
8 and is readily available for tissue uptake. All non-SHBG-bound testosterone is therefore  
9 considered bioavailable.  
10  
11  
12  
13  
14  
15  
16  
17  
18

19 Hypogonadism is an important risk factor for development of osteoporosis in both sexes, but  
20 opioids have not been considered as a risk factor.[16] To our knowledge, the assessment of  
21 BMD in patients undertaking intrathecal drug delivery is limited to one study which  
22 suggested a tendency towards decreased BMD in these patients but the prevalence of  
23 osteopenia or osteoporosis in these patients was not reported in this study.[17]  
24  
25  
26  
27  
28  
29  
30

31 The aim of this study was to investigate the hypothalamic-pituitary-gonadal axis in a sample  
32 of male patients undertaking intrathecal opioid delivery for the management of chronic non-  
33 malignant pain and to assess the prevalence of osteopenia and/or osteoporosis in those  
34 diagnosed with hypogonadism.  
35  
36  
37  
38  
39  
40

## 41 **METHODS**

### 42 **Patients**

43  
44 Twenty consecutive male patients attending follow-up clinics for IDD therapy at Russells Hall  
45 Hospital, Dudley, UK, for the management of chronic non-cancer pain were included in this  
46 observational study using health data routinely collected for non-research purposes. All  
47 assessments were performed as part of routine clinical care. No additional procedures were  
48 carried out for research purposes. None of these patients received testosterone  
49 supplementation within the previous three months. The pain syndrome experienced by the  
50  
51  
52  
53  
54  
55  
56  
57  
58  
59  
60

1  
2  
3 patients was classified as nociceptive (58.8%), neuropathic (5.8%) and mixed nociceptive-  
4  
5 neuropathic (35.3%). All the patients were receiving intrathecal opioids for the management  
6  
7 of their pain. Intrathecal morphine was the only medication administered to 50% of the  
8  
9 sample. In individual cases, other substances were added to the intrathecal medication, with  
10  
11 combinations of morphine with bupivacaine (12.5%), morphine with bupivacaine and  
12  
13 clonidine (25%), and morphine with bupivacaine and baclofen (12.5%).  
14

### 15 16 17 **Laboratory Methods**

18  
19 Blood samples were collected between 8am and 11am during a seven-month period (April to  
20  
21 October 2010), as part of routine clinical care, for the measurement of serum LH, FSH,  
22  
23 prolactin (PRL), total testosterone (TT) and SHBG. All assays were carried out by the  
24  
25 Department of Clinical Biochemistry at Russells Hall Hospital, Dudley, UK. LH, FSH, PRL  
26  
27 and TT were measured according to the manufacturer's instructions by immuno-  
28  
29 enzymometric fluorimetric assay on the Tosoh AIA 2000 LA analyser (Tosoh Bioscience  
30  
31 N.V., Tessenderlo, Belgium). The inter-assay imprecision (%CV) quoted by the manufacturer  
32  
33 was 2.6% for LH, 2.3% for FSH and 5.3% for testosterone. SHBG was measured according  
34  
35 to the manufacturer's instructions by chemiluminescent immunometric assay on the Immulite  
36  
37 2000 XPi analyser (Siemens Healthcare Diagnostics Ltd, Camberley, Surrey, UK). The inter-  
38  
39 assay variability (%CV) for SHBG was 5%. Calculations of free testosterone (FT) were  
40  
41 carried out using the Vermeulen equation.[15] Serum TT < 8 nmol/L and/or FT < 180 pmol/L  
42  
43 was considered as biochemical hypogonadism. Serum TT 8 – 12 nmol/L and/or FT 180-250  
44  
45 pmol/L was considered as borderline/low.[18]  
46  
47  
48

### 49 50 **Assessment of Bone Mineral Density**

51  
52 Bone mineral density was measured by DEXA scanning of the femur (neck and hip) and  
53  
54 lumbar spine or left forearm using the Lunar Prodigy DEXA (GE Lunar Corp., Madison, WI,  
55  
56 USA). Bone densitometry DEXA scans were carried out by the Department of Radiology, at  
57  
58  
59  
60



1  
2  
3 Corbett Hospital, Dudley, UK. Lumbar spine scan was not carried out in patients who had  
4 previous spinal surgery. In those cases, assessment was performed at the left forearm site.  
5 Results are presented as BMD ( $\text{g}/\text{cm}^2$ ), T-scores and Z-scores. Reference values for T-  
6 score were based on UK (ages 20-40) femur, spine or forearm reference population (v107).  
7 Osteopenia was defined as a T-score between -1.0 and -2.5 SD, and osteoporosis as a T-  
8 score at or below -2.5 SD. Measurements of height, weight and body mass index (BMI) were  
9 also performed. The BMI scores were categorised according to the World Health  
10 Organisation key cut-off points as  $<18.5$  (underweight),  $\geq 18.5$  and  $\leq 24.9$  (normal weight),  $\geq$   
11  $25$  and  $\leq 29.9$  (overweight), and  $\geq 30 \text{ kg}/\text{m}^2$  (obese). The 10-year probability of fracture was  
12 calculated based on the Fracture Risk Assessment Tool (FRAX).[19] In addition to the BMD  
13 value or T-score (femoral neck), this tool takes into account clinical risk factors for the  
14 development of osteoporotic or hip fractures such as previous fractures, history of hip  
15 fracture in the patient's parents and hypogonadism, among other factors.  
16  
17  
18  
19  
20  
21  
22  
23  
24  
25  
26  
27  
28  
29  
30

### 31 **Data analysis**

32 Kolmogorov-Smirnov test was performed to test distribution of numerical data, followed by  
33 the appropriate statistical tests. Comparisons between groups were carried out with the  
34 Mann-Whitney test. Data is reported as median (minimum-maximum). The 95% confidence  
35 intervals for the TT and FT median values were calculated for comparison with normal  
36 reference values. Statistical significance was judged at 5% level. Statistical tests were  
37 performed using Predictive Analytics SoftWare (PASW) (version 18.0, SPSS Inc., Chicago,  
38 IL, USA).  
39  
40  
41  
42  
43  
44  
45  
46  
47  
48

## 49 **RESULTS**

### 50 **Assessment of Sex Hormones**

51 The median age at the time of blood collection was 58 years (47-69). The median duration  
52 from implantation of the IDD system to hormone assay was 100 months (15-203) with an  
53  
54  
55  
56  
57  
58  
59  
60

intrathecal opioid dose of 2.68 mg/day (range 1-9.7) (Table 1). The duration of pain prior to commencement of IDD was 9 years (range 3-35).

**Table 1.** Reference ranges and levels in 20 men undertaking intrathecal opioid administration

|                      | Reference range | Intrathecal opioid patients |
|----------------------|-----------------|-----------------------------|
| <b>LH (IU/L)</b>     | 2.2 - 13.3      | 1.9 (0.2-19.9)              |
| <b>FSH (IU/L)</b>    | 1 - 7           | 5.3 (0.3-23.9)              |
| <b>SHBG (nmol/L)</b> | 13 - 71         | 51 (17-123)                 |
| <b>PRL (mU/L)</b>    | 0 - 445         | 225 (53-614)                |
| <b>TT (nmol/L)</b>   | 9.47 - 28.3     | 4.95 (1.2-18.8)             |
| <b>FT (pmol/L)</b>   | 185 - 437       | 69.45 (14-328)              |

**Key:** LH - luteinizing hormone; FSH - follicle stimulating hormone; SHBG - sex hormone binding globulin; PRL - prolactin; TT - total testosterone; FT - free testosterone

Statistics are presented as median (minimum-maximum)

The median TT levels with 95% confidence intervals was 4.95 nmol/L (3.0-10.1), which were significantly lower than the cut-off level of 12 nmol/L for borderline/low testosterone. The median FT levels with 95% confidence intervals [69.45 (47.3-127.0)] were also significantly lower than the cut-off level of 180 pmol/L for low FT ( $t = -3.403$ ,  $p < 0.005$ ,  $r = 0.61$ ). The mean LH, FSH and SHBG concentrations were within the respective reference ranges.

Prolactin levels were above the reference range in two patients. One of these patients had low TT and FT and the other patient presented borderline/low TT. Based on TT, 17 (85%) of the patients presented biochemical hypogonadism values with 12 (60%) at less than 8 nmol/L and 5 (25%) with TT values between 8 and 12 nmol/L (borderline/low). Based on FT calculations, 17 (85%) patients were biochemically hypogonadal with 15 (75%) at less than 180 pmol/L and two (10%) patients between 180 and 250 pmol/L. Only one of the patients had TT and FT values within quoted reference ranges, two patients presented borderline/low TT and normal FT, one patient had low FT values and normal TT, and one borderline/low FT and normal TT.

### Assessment of Bone Mineral Density

Considering that free testosterone reflects more accurately the clinical situation than total testosterone in plasma, [15] the 17 male patients diagnosed as hypogonadal through calculated FT were considered for assessment of bone mineral density. Three patients were excluded (one patient was excluded on the basis that the primary indication for IDD use was spinal osteoporosis, one patient had the intrathecal opioid therapy discontinued and one patient passed away).

The median age of the 14 patients at the time of BMD assessment was 62.5 years (48-70). All the patients investigated for BMD were Caucasian. The BMI score was 29.4 kg/m<sup>2</sup> (20.1-45.4). According to the BMI score, the majority of the patients (64.3%) were either overweight or obese and none of the patients were underweight.

Table 2 shows the results of the BMD assessment. Individual T-scores below -1.0 SD in at least one site were identified in 10 (71.4%) of the patients. Osteopenia defined as a T-score between -1.0 and -2.5 SD was observed in seven (50%) of the patients. Osteoporosis defined as a T-score at or below -2.5 SD was detected in three (21.4%) of the subjects. When considering the Z-scores, one (7.1%) of the participants presented a value at or below -2.5 SD indicating osteoporosis and four (28.6%) other patients Z-scores between -1.0 and -2.5 SD representative of osteopenia.

**Table 2.** Bone Mineral Density measurements

| Site of measurement   | BMD (g/cm <sup>2</sup> ) | T-score            | Z-score            |
|-----------------------|--------------------------|--------------------|--------------------|
| Femoral neck (n = 14) | 0.925 (0.734 - 1.176)    | -1.10 (-2.6 - 0.8) | -0.10 (-1.9 - 2.0) |
| Total hip (n = 14)    | 0.947 (0.686 - 1.222)    | -1.10 (-3.1 - 1.0) | -0.40 (-2.6 - 1.9) |
| Forearm (n = 10)      | 0.736 (0.665 - 0.845)    | -0.40 (-3.2 - 1.2) | 0.30 (-2.4 - 1.7)  |
| Lumbar (n = 4)        | 1.185 (0.876 - 1.487)    | -0.40 (-2.4 - 2.0) | 0.00 (-1.9 - 2.3)  |

**Key:** BMD - Bone Mineral Density

Statistics are presented as median (minimum-maximum)

Seven of the subjects had T-scores below -1.0 SD in more than one assessed site (Table 3). Three patients had either osteoporosis and/or osteopenia in two sites and four patients in three sites. Three of the patients presented Z-scores lower than -1.0 SD in three sites and one patient in two sites. No statistical differences were observed between the patients within normal reference range values and those with osteopenia or osteoporosis for age ( $p = 0.72$ ) or BMI ( $p = 0.48$ ).

**Table 3.** Bone Mineral Density outcomes

| Site of measurement   | Normal       | Osteopenia <sup>a</sup> | Osteoporosis <sup>b</sup> |
|-----------------------|--------------|-------------------------|---------------------------|
| Femoral neck (n = 14) | 7 / 14 (50%) | 5 / 14 (35.7%)          | 2 / 14 (14.3%)            |
| Total hip (n = 14)    | 7 / 14 (50%) | 4 / 14 (28.6%)          | 3 / 14 (21.4%)            |
| Forearm (n = 10)      | 7 / 10 (70%) | 2 / 10 (20%)            | 1 / 10 (10%)              |
| Lumbar (n = 4)        | 2 / 4 (50%)  | 2 / 4 (50%)             |                           |

<sup>a</sup> Osteopenia was defined as  $-2.5 \text{ SD} < \text{T-score} < -1.0 \text{ SD}$

<sup>b</sup> Osteoporosis was defined as  $\text{T-score} \leq -2.5 \text{ SD}$

Values represent the number of patients/total patients (%)

Several known clinical risk factors for low bone mineral density were present in this sample including hypogonadism in all of the patients. *Investigation of osteoporosis related fractures through x-rays were not performed.* Although the patients in the studied group did not report any incident fractures, assessment of the ten-year probability of major osteoporotic or hip fracture based on the FRAX tool indicated a median probability of 5.7% (2.3-17) for major osteoporotic fracture and 1.1% (0.1-11) for hip fracture. Five (35.7%) of the patients were at or above the intervention threshold for hip fracture.

## DISCUSSION

Our study showed that 85% of male patients on intrathecal opioid therapy were biochemically hypogonadal. The serum gonadotropin (LH and FSH) levels in these patients were inappropriately low or low-normal despite low serum testosterone concentrations, suggesting that testosterone suppression was caused through an inhibition of pituitary FSH and LH secretion (secondary hypogonadism). *Raised serum prolactin may have contributed*

1  
2  
3 to the low testosterone in two patients. Although acute administration of morphine leads to  
4 an increase in PRL levels,[12] tolerance usually develops during chronic administration.[20]  
5  
6 Previous studies investigating chronic administration of intrathecal morphine have also  
7  
8 reported a small proportion of patients with elevated PRL levels.[17,21] In a group of cancer  
9  
10 survivors on opioids, 90% exhibited hypogonadism and low testosterone levels; LH levels  
11  
12 but not FSH levels were found to be significantly lower when compared with cancer survivors  
13  
14 not on opioid therapy.[22] The important role of endogenous opioids in the control of LH  
15  
16 secretion has been demonstrated [23] and suppression of the hypothalamic-pituitary-  
17  
18 gonadal axis by intrathecal opioids may be caused by a similar mechanism to that of  
19  
20 endogenous opioids.[24] Nevertheless, the suppression of LH levels may be less  
21  
22 accentuated when the opioids are administered orally or transdermally rather than  
23  
24 intrathecally.[12]  
25  
26  
27  
28

29 Hypogonadism is an important risk factor for the development of osteoporosis in both  
30  
31 sexes.[16] To our knowledge, the incidence of osteopaenia or osteoporosis in patients  
32  
33 undertaking intrathecal opioid therapy has not been previously reported. In our study, 50% of  
34  
35 patients had osteopenia and 21.4% had osteoporosis. Interestingly, an association between  
36  
37 oral opioid administration and reduced BMD was demonstrated in one study but the  
38  
39 presence or absence of hypogonadism was not assessed.[25] In a cross-sectional study,  
40  
41 osteopenia was present in 50% of the male patients undertaking oral opioids [26] but again it  
42  
43 was not clear if those patients were hypogonadal.  
44  
45  
46  
47

48 An association between oral opioid medication and an increase in fracture risk has also been  
49  
50 reported [27] but assessment of bone mineral density was not performed. The authors  
51  
52 suggested that this increase in fracture risk was possibly related to the risk of falls due to the  
53  
54 central nervous system side effect of dizziness caused by oral opioids. Opioid-induced  
55  
56 dizziness is less likely to occur in IDD patients since only a fraction of the opioid delivered  
57  
58  
59  
60

1  
2  
3 via intrathecal route reaches the brain. Low bone mass is an important component of the risk  
4 of fracture as well as non-skeletal factors such as propensity to fall.[16,28] Many fragility  
5 fractures occur in the absence of osteoporosis, although in the presence of this disease, the  
6 risk of fracture is higher.[29] Osteoporotic fractures are a significant cause of morbidity and  
7 mortality especially in the developed countries,[30] and are associated with increased  
8 mortality, particularly in men.[31]

9  
10  
11  
12  
13  
14  
15  
16  
17 The assumption that hypogonadism is a risk factor for decreased BMD has not always been  
18 confirmed in the literature. No association between age-related hypogonadism (based on  
19 total testosterone) and decreased BMD was found in elderly men.[32] In contrast, free  
20 testosterone (calculated according to the Vermeulen equation) was demonstrated to be an  
21 independent predictor of BMD and fractures in elderly men [33] and a positive predictor of  
22 cortical bone size in young men at the age of peak bone mass.[34] These contradictory  
23 findings may have occurred because free testosterone is more important physiologically than  
24 total testosterone. SHBG levels, which generally are genetically determined, seem to play an  
25 important role in bone mass, hence the reason for free testosterone to be a stronger  
26 predictor than total testosterone alone. Recently it has been suggested that SHBG levels in  
27 healthy adult men at the age of peak bone mass were positively associated with cortical  
28 bone size independently of sex-steroid levels.[35] However, in middle aged and elderly men,  
29 SHBG elevation was significantly associated with the occurrence of osteoporotic  
30 fractures.[36] Although not yet confirmed, it has been suggested that the effect of SHBG on  
31 BMD may change with age and/or testosterone sufficiency or deficiency.[37]

32  
33  
34  
35  
36  
37  
38  
39  
40  
41  
42  
43  
44  
45  
46  
47  
48  
49 It is important to note the limitations of this study. A small number of patients were included  
50 without a control group. The gonadal status and bone mineral density were not evaluated  
51 prior to commencement of IDD therapy. Information on systemic opioids was not collected. A  
52 proportion of these patients are provided with oral opioid medication on an individual basis  
53  
54  
55  
56  
57  
58  
59  
60

1  
2  
3 for occasional flare-ups. The strongest systemic opioid provided is tramadol at a dose  $\leq 400$   
4 mg/day. Several possible factors may affect the sexual function in this group of patients.  
5  
6  
7 Chronic pain did not seem to be the cause of gonadal function reduction in patients  
8  
9 undertaking intrathecal morphine therapy when compared with a control group of chronic  
10  
11 pain patients who were not taking any form of opioid drugs.[24] Of the possible chronic  
12  
13 illnesses identified in a longitudinal study with 890 male participants, only cancer (9%) was  
14  
15 associated with a greater decrease in testosterone levels than the decrease that occurred  
16  
17 with ageing alone.[38] Women were not included in this study. Low libido and amenorrhea  
18  
19 have been reported in female IDDS patients,[17,24] although the prevalence has been  
20  
21 reported to be lower in women.[26] A large meta-analysis, which included approximately  
22  
23 39,000 men and women has concluded that the age-specific risk of hip fracture is similar in  
24  
25 both men and women with the same BMD and age.[39] Despite these limitations, the results  
26  
27 of BMD assessment suggest that the IDDS population may have an increased risk for  
28  
29 osteoporotic fractures.  
30  
31

32  
33 It is important to provide appropriate treatment to patients with low BMD. FRAX analysis is a  
34  
35 simple tool that can be used to identify of patients in whom osteoporosis prophylaxis is  
36  
37 appropriate by taking into account multiple risk factors including BMD levels and  
38  
39 hypogonadism. BMD can be normalized and maintained within the normal range in men with  
40  
41 either primary or secondary hypogonadism by continuous, long-term hormonal replacement  
42  
43 therapy [40] though the full effect on BMD may take up to 24 months.[41] Opioid induced  
44  
45 hypogonadism may be reversible. Clinically significant improvements in hypogonadal  
46  
47 symptoms were observed in men with opioid induced androgen deficiency following  
48  
49 treatment with transdermal testosterone patches. [42] In patients undertaking intrathecal  
50  
51 opioid delivery, recovery of serum testosterone levels following cessation of therapy or  
52  
53 significant improvements in libido following hormonal replacement therapy have also been  
54  
55 reported.[17,24]  
56  
57  
58  
59  
60

1  
2  
3  
4  
5 Further studies in this patient group are warranted. Future studies should prospectively  
6  
7 evaluate the gonadal axis, reported sexual health of the participants and BMD. It would also  
8  
9 be important to compare these results with matched cohorts of chronic pain patients.

10  
11 Potential comparisons include patients on systemic opioids only, on a different course of  
12  
13 intrathecal therapy (e.g. ziconotide) or patients using spinal cord stimulation for the  
14  
15 management of their chronic pain.

16  
17  
18  
19 This study suggests an important association between hypogonadism and low bone mass  
20  
21 density in patients undertaking intrathecal opioid delivery for the management of chronic  
22  
23 non-malignant pain. However, since the gonadal status and BMD were not determined prior  
24  
25 to initiation of intrathecal opioid delivery, we cannot conclude that the decreased BMD was  
26  
27 caused by hypogonadism or opioid administration. Early detection of hypogonadism followed  
28  
29 by appropriate treatment may be paramount to reduce the risk of osteoporosis development  
30  
31 and prevention of fractures in this population. Furthermore, surveillance of BMD levels in  
32  
33 hypogonadal intrathecal opioid delivery patients should be considered.  
34  
35  
36  
37  
38  
39  
40  
41  
42  
43  
44  
45  
46  
47  
48  
49  
50  
51  
52  
53  
54  
55  
56  
57  
58  
59  
60



## ARTICLE SUMMARY

### Article focus

- Hypogonadism is common in intrathecal opioid therapy patients but there is limited literature investigating bone mineral density in this population.
- We aimed to prospectively investigate if undiagnosed hypogonadism in intrathecal opioid therapy patients may result in low bone mineral density levels.

### Key messages

- Undiagnosed hypogonadism in intrathecal opioid therapy patients may lead to low bone mineral density levels.
- Hypogonadism and bone mineral density levels surveillance may be paramount to reduce the risk of osteoporosis and fractures in patients undertaking intrathecal opioid therapy.

### Strengths and limitations of this study

- To our knowledge, this is the first study to specifically address the potential decrease in bone mineral density as a consequence of long-term intrathecal opioid therapy.
- Further studies are warranted to assess the effectiveness of early detection and adequate treatment to prevent bone mineral density decrease and to investigate the value of hormonal replacement therapy to normalise bone mineral density levels.

### Acknowledgments

The authors are grateful to Dr Jane Dale from the Department of Endocrinology and Diabetes at Russells Hall Hospital for her comments on the final version of this manuscript.

### Funding statement

This research received no specific grant from any funding agency in the public, commercial or not-for-profit sectors.

### Competing interests statement

The authors report no conflicts of interest.

### Contributorship statement

RVD, JHR, JLS, MHL, AJW and RLA have made substantial contributions to (1) the conception and design of the study, or acquisition of data, or analysis and interpretation of data; (2) drafting the article or revising it critically for important intellectual content; and (3) final approval of the version to be submitted.

### Ethics approval

All assessments were performed as part of routine clinical care. No additional procedures were carried out for research purposes.

### REFERENCES

- 1 Onofrio BM, Yaksh TL, Arnold PG. Continuous low-dose intrathecal morphine administration in the treatment of chronic pain of malignant origin. *Mayo Clin Proc* 1981;56:516-20.
- 2 Grady K, Raphael J. Spinal administration. In: Rice A. ed. *Textbook of Clinical Pain Management: Chronic Volume*. London: Hodder Arnold 2008:284-91.
- 3 Nordberg G, Hedner T, Mellstrand T, et al. Pharmacokinetic aspects of intrathecal morphine analgesia. *Anesthesiology* 1984;60:448-54.
- 4 Bernards C. Cerebrospinal fluid and spinal cord distribution of baclofen and bupivacaine during slow intrathecal infusion in pigs. *Anesthesiology* 2006;105:169-178.
- 5 Duarte RV, Raphael JH, Sparkes E, et al. Long-term intrathecal drug administration for chronic nonmalignant pain. *J Neurosurg Anesthesiol* 2012;24:63-70.
- 6 Duarte RV, Raphael JH, Haque MS, et al. A predictive model for intrathecal opioid dose escalation for chronic non-cancer pain. *Pain Physician* 2012;15:363-69.

- 1  
2  
3 7 Doleys D, Dinoff B, Page L, et al. Sexual dysfunction and other side effects of intraspinal  
4 opiate use in the management of chronic non-cancer pain. *American Journal of Pain*  
5 Management 1998;8:5-11.  
6  
7  
8  
9 8 Reddy RG, Aung T, Karavitaki N, et al. Opioid induced hypogonadism. *BMJ*  
10 2010;341:c4462.  
11  
12  
13 9 Duarte RV, Raphael JH, Mourad Labib, et al. Prevalence and influence of diagnostic  
14 criteria in the assessment of hypogonadism in intrathecal opioid therapy patients. *Pain*  
15 Physician 2013;16:9-14.  
16  
17  
18  
19 10 Katz N, Mazer NA. The impact of opioids on the endocrine system. *Clin J Pain*  
20 2009;25:170-5.  
21  
22  
23 11 Petak SM, Nankin HR, Spark RF, et al. American Association of Clinical Endocrinologists  
24 Medical Guidelines for clinical practice for the evaluation and treatment of hypogonadism  
25 in adult male patients - 2002 update. *Endocr Pract* 2002;8:440-56.  
26  
27  
28  
29 12 Vuong C, Van Uum SHM, O'Dell LE, et al. The effects of opioids and opioid analogs on  
30 animal and human endocrine systems. *Endocr Rev* 2010;31:98-132.  
31  
32  
33 13 Schulz R, Wilhelm A, Pirke KM, et al. Beta-endorphin and dynorphin control serum  
34 luteinizing hormone level in immature female rats. *Nature* 1981;294:757-9.  
35  
36  
37 14 Pfeiffer DG, Pfeiffer A, Shimohigashi Y, et al. Predominant involvement of mu-rather than  
38 delta- or kappa-opiate receptors in LH secretion. *Peptides* 1983;4:647-9.  
39  
40  
41 15 Vermeulen A, Verdonck L, Kaufman JM. A critical evaluation of simple methods for the  
42 estimation of free testosterone in serum. *J Clin Endocrinol Metab* 1999;84:3666-72.  
43  
44  
45 16 Kanis JA. Diagnosis of osteoporosis and assessment of fracture risk. *Lancet*  
46 2002;359:1929-36.  
47  
48  
49 17 Abs R, Verhelst J, Maeyaert J, et al. Endocrine consequences of long-term intrathecal  
50 administration of opioids. *J Clin Endocrinol Metab* 2000;85:2215-22.  
51  
52  
53 18 Hackett G, Cole NS, Deshpande AA, et al. Biochemical hypogonadism in men with type 2  
54 diabetes in primary care practice. *Br J Diabetes Vasc Dis* 2009;9:226-31.  
55  
56  
57  
58  
59  
60

- 1  
2  
3 19 Kanis JA, Johnell O, Oden A, et al. FRAX and the assessment of fracture probability in  
4 men and women from the UK. *Osteoporos Int* 2008;19:385-97.  
5  
6  
7 20 Morley JE. The endocrinology of the opiates and opioid peptides. *Metabolism*  
8 1981;30:195-209.  
9  
10  
11 21 Paice JA, Penn RD, Ryan WG. Altered sexual function and decreased testosterone in  
12 patients receiving intraspinal opioids. *J Pain Symptom Manage* 1994;9:126-31.  
13  
14 22 Rajagopal A, Vassilopoulou-Sellin R, Palmer JL, et al. Symptomatic hypogonadism in  
15 male survivors of cancer with chronic exposure to opioids. *Cancer* 2004;100:851-8.  
16  
17 23 Genazzani AR, Genazzani AD, Volpogni C, et al. Opioid control of gonadotrophin  
18 secretion in humans. *Hum Reprod* 1993;8(Suppl 2):151-3.  
19  
20 24 Finch P, Roberts L, Price L, et al. Hypogonadism in patients treated with intrathecal  
21 morphine. *Clin J Pain* 2000;16:251-4.  
22  
23 25 Kinjo M, Setoguchi S, Schneeweiss S, et al. Bone mineral density in subjects using  
24 central nervous system-active medications. *Am J Med* 2005;118:1414.  
25  
26 26 Fraser LA, Morrison D, Morley-Forster P, et al. Oral opioids for chronic non-cancer pain:  
27 higher prevalence of hypogonadism in men than in women. *Exp Clin Endocrinol Diabetes*  
28 2009;117:38-43.  
29  
30 27 Vestergaard P, Rejnmark L, Mosekilde L. Fracture risk associated with the use of  
31 morphine and opiates. *J Inter Med* 2006;260:76-87.  
32  
33 28 Center JR, Nguyen TV, Sambrook PN, et al. Hormonal and biochemical parameters and  
34 osteoporotic fractures in elderly men. *J Bone Miner Res* 2000;15:05-1411.  
35  
36 29 Kanis JA, Melton LJ, Christiansen C, et al. The diagnosis of osteoporosis. *J Bone Miner*  
37 *Res* 1994;9:1137-41.  
38  
39 30 Johnell O, Kanis JA. An estimate of the worldwide prevalence and disability associated  
40 with osteoporotic fractures. *Osteoporos Int* 2006;17:1726-33.  
41  
42 31 Center JR, Nguyen TV, Schneider D, et al. Mortality after all major types of osteoporotic  
43 fracture in men and women: an observational study. *Lancet* 1999;353:878-82.  
44  
45  
46  
47  
48  
49  
50  
51  
52  
53  
54  
55  
56  
57  
58  
59  
60

- 1  
2  
3 32 Amin S, Zhang Y, Sawin CT, et al. Association of hypogonadism and estradiol levels with  
4 bone mineral density in elderly men from the Framingham study. *Ann Intern Med*  
5 2000;133:951-63.  
6  
7  
8  
9 33 Mellström D, Johnell O, Ljunggren O, et al. Free testosterone is an independent predictor  
10 of BMD and prevalent fractures in elderly men: MrOS Sweden. *J Bone Miner Res*  
11 2006;21:529-35.  
12  
13  
14 34 Lorentzon M, Swanson C, Andersson N, et al. Free testosterone is a positive, whereas  
15 free estradiol is a negative, predictor of cortical bone size in young Swedish men: the  
16 GOOD study. *J Bone Miner Res* 2005;20:1334-41.  
17  
18  
19  
20 35 Vanbillemont G, Lapauw B, Bogaert V, et al. Sex hormone-binding globulin as an  
21 independent determinant of cortical bone status in men at the age of peak bone mass. *J*  
22 *Clin Endocrinol Metab* 2010;95:1579-86.  
23  
24  
25  
26 36 Hoppé E, Bouvard B, Royer M, et al. Sex hormone-binding globulin in osteoporosis. *Joint*  
27 *Bone Spine* 2010;77:306-312.  
28  
29  
30  
31 37 Khosla S. Sex hormone binding globulin: inhibitor or facilitator (or both) of sex steroid  
32 action? *J Clin Endocrinol Metab* 2006;91:4764-6.  
33  
34  
35  
36 38 Harman S, Metter E, Tobin J, et al. Longitudinal effects of aging on serum total and free  
37 testosterone levels in healthy men. *J Clin Endocrinol Metab* 2001;86:724-31.  
38  
39  
40 39 Johnell O, Kanis JA, Oden A, et al. Predictive value of BMD for hip and other fractures. *J*  
41 *Bone Miner Res* 2005;20:1185-94.  
42  
43  
44 40 Katznelson L, Finkelstein JS, Schoenfeld DA, et al. Increase in bone density and lean  
45 body mass during testosterone administration in men with acquired hypogonadism. *J Clin*  
46 *Endocrinol Metab* 1996;81:4358-65.  
47  
48  
49  
50 41 Snyder PJ, Peachey H, Berlin JA, et al. Effects of testosterone replacement in  
51 hypogonadal men. *J Clin Endocrinol Metab* 2000;85:2670-77.  
52  
53  
54 42 Daniell HW, Lentz R, Mazer NA. Open-label pilot study of testosterone patch therapy in  
55 men with opioid-induced androgen deficiency. *J Pain* 2006;7:200-10.  
56  
57  
58  
59  
60

## STROBE Statement—checklist of items that should be included in reports of observational studies

|                              | Item No | Recommendation                                                                                                                                                                                                                                                                                                                                                                                                                                                                                                                                                                                                                                                                                                   |
|------------------------------|---------|------------------------------------------------------------------------------------------------------------------------------------------------------------------------------------------------------------------------------------------------------------------------------------------------------------------------------------------------------------------------------------------------------------------------------------------------------------------------------------------------------------------------------------------------------------------------------------------------------------------------------------------------------------------------------------------------------------------|
| <b>Title and abstract</b>    | 1       | (a) Indicate the study's design with a commonly used term in the title or the abstract <b>Page 2</b><br>(b) Provide in the abstract an informative and balanced summary of what was done and what was found <b>Page 2</b>                                                                                                                                                                                                                                                                                                                                                                                                                                                                                        |
| <b>Introduction</b>          |         |                                                                                                                                                                                                                                                                                                                                                                                                                                                                                                                                                                                                                                                                                                                  |
| Background/rationale         | 2       | Explain the scientific background and rationale for the investigation being reported <b>Page 2-4</b>                                                                                                                                                                                                                                                                                                                                                                                                                                                                                                                                                                                                             |
| Objectives                   | 3       | State specific objectives, including any prespecified hypotheses <b>Page 4</b>                                                                                                                                                                                                                                                                                                                                                                                                                                                                                                                                                                                                                                   |
| <b>Methods</b>               |         |                                                                                                                                                                                                                                                                                                                                                                                                                                                                                                                                                                                                                                                                                                                  |
| Study design                 | 4       | Present key elements of study design early in the paper <b>Page 4</b>                                                                                                                                                                                                                                                                                                                                                                                                                                                                                                                                                                                                                                            |
| Setting                      | 5       | Describe the setting, locations, and relevant dates, including periods of recruitment, exposure, follow-up, and data collection <b>Page 4,5</b>                                                                                                                                                                                                                                                                                                                                                                                                                                                                                                                                                                  |
| Participants                 | 6       | (a) <i>Cohort study</i> —Give the eligibility criteria, and the sources and methods of selection of participants. Describe methods of follow-up <b>Page 4-6</b><br><i>Case-control study</i> —Give the eligibility criteria, and the sources and methods of case ascertainment and control selection. Give the rationale for the choice of cases and controls<br><i>Cross-sectional study</i> —Give the eligibility criteria, and the sources and methods of selection of participants<br>(b) <i>Cohort study</i> —For matched studies, give matching criteria and number of exposed and unexposed<br><i>Case-control study</i> —For matched studies, give matching criteria and the number of controls per case |
| Variables                    | 7       | Clearly define all outcomes, exposures, predictors, potential confounders, and effect modifiers. Give diagnostic criteria, if applicable <b>Page 4,5</b>                                                                                                                                                                                                                                                                                                                                                                                                                                                                                                                                                         |
| Data sources/<br>measurement | 8*      | For each variable of interest, give sources of data and details of methods of assessment (measurement). Describe comparability of assessment methods if there is more than one group <b>Page 4,5</b>                                                                                                                                                                                                                                                                                                                                                                                                                                                                                                             |
| Bias                         | 9       | Describe any efforts to address potential sources of bias <b>Page 4</b>                                                                                                                                                                                                                                                                                                                                                                                                                                                                                                                                                                                                                                          |
| Study size                   | 10      | Explain how the study size was arrived at                                                                                                                                                                                                                                                                                                                                                                                                                                                                                                                                                                                                                                                                        |
| Quantitative variables       | 11      | Explain how quantitative variables were handled in the analyses. If applicable, describe which groupings were chosen and why <b>Page 6</b>                                                                                                                                                                                                                                                                                                                                                                                                                                                                                                                                                                       |
| Statistical methods          | 12      | (a) Describe all statistical methods, including those used to control for confounding <b>Page 6</b><br>(b) Describe any methods used to examine subgroups and interactions <b>Page 6</b><br>(c) Explain how missing data were addressed<br>(d) <i>Cohort study</i> —If applicable, explain how loss to follow-up was addressed<br><i>Case-control study</i> —If applicable, explain how matching of cases and controls was addressed<br><i>Cross-sectional study</i> —If applicable, describe analytical methods taking account of sampling strategy<br>(e) Describe any sensitivity analyses                                                                                                                    |

Continued on next page

**Results**

|                  |     |                                                                                                                                                                                                                                                                                                                                                                                                                                             |
|------------------|-----|---------------------------------------------------------------------------------------------------------------------------------------------------------------------------------------------------------------------------------------------------------------------------------------------------------------------------------------------------------------------------------------------------------------------------------------------|
| Participants     | 13* | (a) Report numbers of individuals at each stage of study—eg numbers potentially eligible, examined for eligibility, confirmed eligible, included in the study, completing follow-up, and analysed <b>Page 6,7</b><br>(b) Give reasons for non-participation at each stage <b>Page 7</b><br>(c) Consider use of a flow diagram                                                                                                               |
| Descriptive data | 14* | (a) Give characteristics of study participants (eg demographic, clinical, social) and information on exposures and potential confounders <b>Page 6-8</b><br>(b) Indicate number of participants with missing data for each variable of interest<br>(c) <i>Cohort study</i> —Summarise follow-up time (eg, average and total amount)                                                                                                         |
| Outcome data     | 15* | <i>Cohort study</i> —Report numbers of outcome events or summary measures over time <b>Page 7-9</b><br><i>Case-control study</i> —Report numbers in each exposure category, or summary measures of exposure<br><i>Cross-sectional study</i> —Report numbers of outcome events or summary measures                                                                                                                                           |
| Main results     | 16  | (a) Give unadjusted estimates and, if applicable, confounder-adjusted estimates and their precision (eg, 95% confidence interval). Make clear which confounders were adjusted for and why they were included <b>Page 7</b><br>(b) Report category boundaries when continuous variables were categorized <b>Page 5-6</b><br>(c) If relevant, consider translating estimates of relative risk into absolute risk for a meaningful time period |
| Other analyses   | 17  | Report other analyses done—eg analyses of subgroups and interactions, and sensitivity analyses                                                                                                                                                                                                                                                                                                                                              |

**Discussion**

|                  |    |                                                                                                                                                                                             |
|------------------|----|---------------------------------------------------------------------------------------------------------------------------------------------------------------------------------------------|
| Key results      | 18 | Summarise key results with reference to study objectives <b>Page 9</b>                                                                                                                      |
| Limitations      | 19 | Discuss limitations of the study, taking into account sources of potential bias or imprecision. Discuss both direction and magnitude of any potential bias <b>Page 11,12</b>                |
| Interpretation   | 20 | Give a cautious overall interpretation of results considering objectives, limitations, multiplicity of analyses, results from similar studies, and other relevant evidence <b>Page 9-12</b> |
| Generalisability | 21 | Discuss the generalisability (external validity) of the study results <b>Page 12</b>                                                                                                        |

**Other information**

|         |    |                                                                                                                                                                              |
|---------|----|------------------------------------------------------------------------------------------------------------------------------------------------------------------------------|
| Funding | 22 | Give the source of funding and the role of the funders for the present study and, if applicable, for the original study on which the present article is based <b>Page 13</b> |
|---------|----|------------------------------------------------------------------------------------------------------------------------------------------------------------------------------|

\*Give information separately for cases and controls in case-control studies and, if applicable, for exposed and unexposed groups in cohort and cross-sectional studies.

**Note:** An Explanation and Elaboration article discusses each checklist item and gives methodological background and published examples of transparent reporting. The STROBE checklist is best used in conjunction with this article (freely available on the Web sites of PLoS Medicine at <http://www.plosmedicine.org/>, Annals of Internal Medicine at <http://www.annals.org/>, and Epidemiology at <http://www.epidem.com/>). Information on the STROBE Initiative is available at [www.strobe-statement.org](http://www.strobe-statement.org).
